# Supplementary material for: Dinuclear zinc-catalyzed asymmetric [3 + 2] cyclization reaction for direct assembly of chiral α-amino-γ-butyrolactones bearing three stereocenters
Source: Royal Society of Chemistry journal article supplement (doi:10.1039/d1qo01338f), 2021-01-01
Supplement: d1qo01338f1.pdf [file d1qo01338f1.pdf]

## Supporting Information

# **Dinuclear zinc-catalyzed asymmetric [3+2] cyclization reaction for direct assembly of chiral $\alpha$ -amino- $\gamma$ -butyrolactones bearing three stereocenters**

Wen-Peng Yang, Shi-Kun Jia,\* Tian-Tian Liu, Yuan-Zhao Hua\* and Min-Can Wang\*

Green Catalysis Center, and College of Chemistry, Zhengzhou University, China.

### Table of Contents

|                                                                                            |              |
|--------------------------------------------------------------------------------------------|--------------|
| <b>1. General Information</b>                                                              | <b>2</b>     |
| <b>2. General Procedure for optimization of the reaction conditions.</b>                   | <b>2</b>     |
| <b>3. Synthesis of chiral <math>\alpha</math>-amino-<math>\gamma</math>-butyrolactones</b> | <b>2-14</b>  |
| <b>4. Gram-scale reaction</b>                                                              | <b>14</b>    |
| <b>5. References</b>                                                                       | <b>15</b>    |
| <b>6. NMR Spectra</b>                                                                      | <b>16-50</b> |
| <b>7. HPLC</b>                                                                             | <b>51-72</b> |
| <b>8. Single-crystal X-ray diffraction</b>                                                 | <b>73-80</b> |

## General Information

All reactions were carried out under an atmosphere of argon using oven-dried glassware. Super dry solvents, metal catalysts, were purchased from chemical companies and used without further treatment. Flash column chromatography was performed using silica gel (300-400 mesh).  $^1\text{H}$  NMR,  $^{13}\text{C}$  NMR,  $^{19}\text{F}$  NMR spectra were recorded in  $\text{CDCl}_3$  or  $\text{DMSO-d}_6$  on a 400 MHz spectrometer; chemical shifts are reported in ppm with the solvent signals as reference, and coupling constants ( $J$ ) are given in Hertz. The peak information is described as: s = singlet, d = doublet, t = triplet, q = quartet, m = multiplet. High-resolution mass spectra (HRMS) were recorded on a commercial apparatus (ESI Source).  $\alpha$ -Hydroxy-1-indanone<sup>1</sup>,  $\alpha$ -hydroxyacetophenone<sup>2</sup>, 3-hydroxychroman-4-one<sup>3</sup> and alkylidene azlactone<sup>4</sup> were synthesized according to the literature.

## General Procedure for optimization of the reaction conditions.

Under a nitrogen atmosphere, a solution of diethylzinc (40  $\mu\text{L}$ , 1.0 M in hexane, 0.04 mmol) was added dropwise to a solution of **L** (0.02 mmol) in solvent (2 mL). After the mixture was stirred for 30 min at room temperature, then,  $\alpha$ -hydroxy-1-indanone **1a** (0.2 mmol) and alkylidene azlactone **2a** (0.2 mmol) were added. The reaction mixture was stirred for 24 h at the same temperature. The reaction was quenched with HCl solution (1 M, 2 mL), and the organic layer was extracted with  $\text{CH}_2\text{Cl}_2$  (3  $\times$  5 mL). The combined organic layer was washed with brine and dried over  $\text{Na}_2\text{SO}_4$ . The solvent was removed under reduced pressure by using a rotary evaporator. The residue was purified by flash chromatography with petroleum ether/ethyl acetate (4/1) to afford the desired product **3a**.

## Synthesis of chiral $\alpha$ -amino- $\gamma$ -butyrolactones.

Under a nitrogen atmosphere, a solution of diethylzinc (40  $\mu\text{L}$ , 1.0 M in hexane, 0.04 mmol) was added dropwise to a solution of **L4** (0.02 mmol) in THF (2 mL). After the mixture was stirred for 30 min at room temperature, then,  $\alpha$ -hydroxy-1-indanone **1** or  $\alpha$ -hydroxyacetophenone **1** or 3-hydroxychroman-4-one **1** (0.2 mmol) and alkylidene azlactone **2** (0.2 mmol) were added. The reaction mixture was stirred for 24 h at the same temperature. The reaction was quenched with HCl solution (1 M, 2 mL), and the organic layer was extracted with  $\text{CH}_2\text{Cl}_2$  (3  $\times$  5 mL). The combined organic layer was washed with brine and dried over  $\text{Na}_2\text{SO}_4$ . The solvent was removed under reduced pressure by using a rotary evaporator. The residue was purified by flash chromatography with petroleum ether/ethyl acetate (4/1) to afford the desired product **3**.

## Characterization of **3**

*N*-((2*S*,3*S*,4*R*)-1',5-dioxo-3-phenyl-1',3',4,5-tetrahydro-3*H*-spiro[furan-2,2'-inden]-4-yl)benzamide (**3a**):

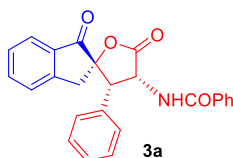

Yellow solid in 70% isolated yield (83mg, >20:1 dr);  $[\alpha]_{\text{D}}^{20} = +125$  ( $c = 1.0$ ,  $\text{DMSO}$ , 99% ee); **m.p.** = 112.6-113.4  $^{\circ}\text{C}$ ;  $^1\text{H}$  NMR (400 MHz,  $\text{DMSO-d}_6$ )  $\delta$  8.70 (d,  $J = 7.6$  Hz, 1H), 7.84 (d,  $J = 7.6$  Hz, 1H), 7.79-7.73 (m, 1H), 7.56-7.43 (m, 5H), 7.39-7.30 (m, 5H), 7.20-7.13 (m, 2H), 6.04-5.97 (m, 1H), 4.35 (d,  $J = 8.8$  Hz, 1H), 3.36 (d,  $J = 18.1$  Hz, 1H), 3.01 (d,  $J = 18.2$  Hz, 1H);  $^{13}\text{C}$  NMR (101 MHz,

DMSO- $d_6$ )  $\delta$  201.5, 173.9, 167.1, 151.1, 136.9, 134.7, 133.3, 132.3, 131.5, 129.2, 128.6, 128.0, 127.4, 126.9, 124.8, 88.6, 52.5, 49.9, 36.3; **IR** (neat): 3386, 2919, 1788, 1716, 1655, 1160, 747, 699, 467  $\text{cm}^{-1}$ ; **HRMS** (ESI):  $m/z$  for  $[M+H]^+$ : calcd 398.1387, found 398.1384; **HPLC**: Daicel Chiralpak IA, *n*-hexane/*i*-PrOH = 50/50, flow rate = 1 mL/min,  $\lambda$  = 254 nm,  $t_{\text{major}}$  = 15.50 min and  $t_{\text{minor}}$  = 9.28 min.

***N*-((2*S*,3*S*,4*R*)-6'-chloro-1',5-dioxo-3-phenyl-1',3',4,5-tetrahydro-3*H*-spiro[furan-2,2'-inden]-4-yl) benzamide (3b):**

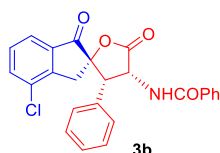

Major diastereoisomer of **3b**: Yellow solid in 80% isolated yield (103mg, 5:1 dr);  $[\alpha]_D^{20} = +79$  ( $c = 1.0$ ,  $\text{CDCl}_3$ , 94% ee); **m.p.** = 222.8-223.6 °C; **<sup>1</sup>H NMR** (400 MHz,  $\text{DMSO-}d_6$ )  $\delta$  8.74 (d,  $J = 7.5$  Hz, 1H), 7.91-7.81 (m, 2H), 7.62-7.56 (m, 1H), 7.53-7.42 (m, 3H), 7.40-7.28 (m, 5H), 7.23-7.01 (m, 3H), 6.07-5.89 (m, 1H), 4.43 (d,  $J = 8.8$  Hz, 1H), 3.31 (d,  $J = 18.1$  Hz, 1H), 2.94 (d,  $J = 18.2$  Hz, 1H); **<sup>13</sup>C NMR** (101 MHz,  $\text{DMSO-}d_6$ )  $\delta$  200.6, 173.7, 167.0, 148.2, 136.2, 134.6, 133.3, 131.4, 130.6, 129.3, 128.9, 128.4, 128.0, 127.5, 127.3, 123.7, 88.2, 52.4, 49.8, 35.4; **IR** (neat): 3392, 2926, 1797, 1715, 1667, 1523, 1156, 713, 509  $\text{cm}^{-1}$ ; **HRMS** (ESI):  $m/z$  for  $[M+H]^+$ : calcd 432.0997, found 432.0995; **HPLC**: Daicel Chiralpak IB, *n*-hexane/*i*-PrOH = 80/20, flow rate = 1 mL/min,  $\lambda$  = 254 nm,  $t_{\text{major}}$  = 14.89 min and  $t_{\text{minor}}$  = 10.98 min.

***N*-((2*S*,3*S*,4*R*)-5'-methyl-1',5-dioxo-3-phenyl-1',3',4,5-tetrahydro-3*H*-spiro[furan-2,2'-inden]-4-yl) benzamide (3c):**

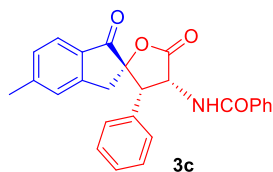

Yellow solid in 80% isolated yield (99mg, >20:1 dr);  $[\alpha]_D^{20} = +77$  ( $c = 1.0$ ,  $\text{DMSO}$ , 95% ee); **m.p.** = 235.5-236.3 °C; **<sup>1</sup>H NMR** (400 MHz,  $\text{DMSO-}d_6$ )  $\delta$  8.69 (d,  $J = 7.2$  Hz, 1H), 7.73 (d,  $J = 7.7$  Hz, 1H), 7.53-7.42 (m, 3H), 7.39-7.27 (m, 7H), 7.16 (d,  $J = 5.9$  Hz, 2H), 6.08 – 5.93 (m, 1H), 4.30 (d,  $J = 8.6$  Hz, 1H), 3.31 (d,  $J = 22.4$  Hz, 1H), 2.95 (d,  $J = 18.2$  Hz, 1H), 2.39 (s, 3H); **<sup>13</sup>C NMR** (101 MHz,  $\text{DMSO-}d_6$ )  $\delta$  200.7, 173.9, 167.0, 151.4, 148.2, 134.8, 133.3, 131.5, 129.9, 129.7, 129.3, 128.7, 128.0, 127.5, 127.0, 124.77, 88.77, 52.5, 50.15, 36.1, 21.8; **IR** (neat): 3399, 2926, 1783, 1712, 1671, 1609, 1123, 1085, 709, 496  $\text{cm}^{-1}$ ; **HRMS** (ESI):  $m/z$  for  $[M+H]^+$ : calcd 412.1543, found 432.1542; **HPLC**: Daicel Chiralpak IB, *n*-hexane/*i*-PrOH = 80/20, flow rate = 1 mL/min,  $\lambda$  = 254 nm,  $t_{\text{major}}$  = 16.07 min and  $t_{\text{minor}}$  = 12.64 min.

***N*-((2*S*,3*S*,4*R*)-5'-fluoro-1',5-dioxo-3-phenyl-1',3',4,5-tetrahydro-3*H*-spiro[furan-2,2'-inden]-4-yl) benzamide (3d):**

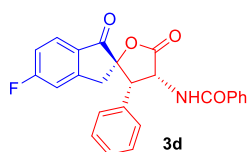

Yellow solid in 76% isolated yield (94mg, >20:1 dr);  $[\alpha]_{\text{D}}^{20} = +90$  (c = 1.0, DMSO, 99% ee); **m.p.** = 239.1-240.2 °C; **<sup>1</sup>H NMR** (400 MHz, DMSO-*d*<sub>6</sub>) δ 8.71 (d, *J* = 7.4 Hz, 1H), 7.98-7.85 (m, 1H), 7.52-7.43 (m, 3H), 7.41-7.29 (m, 7H), 7.17 (d, *J* = 6.6 Hz, 2H), 6.05-5.92 (m, 1H), 4.38 (d, *J* = 8.8 Hz, 1H), 3.36 (d, *J* = 17.9 Hz, 1H), 3.02 (d, *J* = 18.4 Hz, 1H); **<sup>13</sup>C NMR** (101 MHz, DMSO-*d*<sub>6</sub>) δ 199.7, 173.8, 167.40 (d, *J* = 256.0 Hz), 167.0, 154.46 (d, *J* = 11.3 Hz), 134.7, 133.3, 131.5, 129.2, 128.7, 128.2, 128.3, 127.4, 127.3, 117.0, 116.7, 113.8, 113.6, 88.6, 52.5, 50.0, 36.3; **<sup>19</sup>F NMR** (376 MHz, DMSO-*d*<sub>6</sub>) δ -99.98; **IR** (neat): 3383, 2929, 1799, 1713, 1662, 1264, 1139, 714, 646, 498 cm<sup>-1</sup>; **HRMS** (ESI): *m/z* for [M+H]<sup>+</sup>: calcd 416.1293, found 416.1292; **HPLC**: Daicel Chiralpak IB, *n*-hexane/*i*-PrOH = 80/20, flow rate = 1 mL/min, λ = 254 nm, *t*<sub>major</sub> = 14.65 min and *t*<sub>minor</sub> = 18.34 min.  
***N*-((2*S*,3*S*,4*R*)-5'-chloro-1',5-dioxo-3-phenyl-1',3',4,5-tetrahydro-3*H*-spiro[furan-2,2'-inden]-4-yl) benzamide (3e):**

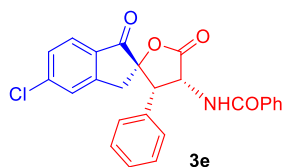

Yellow solid in 78% isolated yield (100mg, >20:1 dr);  $[\alpha]_{\text{D}}^{20} = +97$  (c = 1.0, DMSO, 98% ee); **m.p.** = 232.2-233.4 °C; **<sup>1</sup>H NMR** (400 MHz, DMSO-*d*<sub>6</sub>) δ 8.72 (d, *J* = 7.4 Hz, 1H), 7.85 (d, *J* = 8.2 Hz, 1H), 7.65 (s, 1H), 7.59 (d, *J* = 8.1 Hz, 1H), 7.52-7.42 (m, 3H), 7.40-7.29 (m, 5H), 7.17 (d, *J* = 6.5 Hz, 2H), 6.05-5.95 (m, 1H), 4.39 (d, *J* = 8.8 Hz, 1H), 3.35 (d, *J* = 18.3 Hz, 1H), 3.02 (d, *J* = 18.4 Hz, 1H); **<sup>13</sup>C NMR** (101 MHz, DMSO-*d*<sub>6</sub>) δ 200.3, 173.8, 167.0, 152.9, 141.7, 134.7, 133.3, 131.5, 131.2, 129.3, 129.0, 128.7, 128.0, 127.5, 127.0, 126.4, 88.5, 52.5, 49.9, 36.2; **IR** (neat): 3399, 2988, 1787, 1717, 1667, 1629, 1102, 1084, 713, 464 cm<sup>-1</sup>; **HRMS** (ESI): *m/z* for [M+H]<sup>+</sup>: calcd 432.0997, found 432.0996; **HPLC**: Daicel Chiralpak IB, *n*-hexane/*i*-PrOH = 80/20, flow rate = 1 mL/min, λ = 254 nm, *t*<sub>major</sub> = 11.54 min and *t*<sub>minor</sub> = 15.50 min.

***N*-((2*S*,3*S*,4*R*)-5'-bromo-1',5-dioxo-3-phenyl-1',3',4,5-tetrahydro-3*H*-spiro[furan-2,2'-inden]-4-yl) benzamide (3f):**

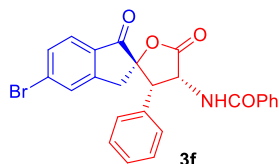

Yellow solid in 40% isolated yield (57mg, >20:1 dr);  $[\alpha]_{\text{D}}^{20} = +66$  (c = 1.0, DMSO, 97% ee); **m.p.** = 258.0-259.1 °C; **<sup>1</sup>H NMR** (400 MHz, DMSO-*d*<sub>6</sub>) δ 8.69 (d, *J* = 7.5 Hz, 1H), 7.83-7.70 (m, 3H), 7.52-7.43 (m, 3H), 7.40-7.29 (m, 5H), 7.16 (d, *J* = 6.6 Hz, 2H), 6.07-5.90 (m, 1H), 4.38 (d, *J* = 8.8 Hz, 1H), 3.35 (d, *J* = 19.0 Hz, 1H), 3.02 (d, *J* = 18.4 Hz, 1H); **<sup>13</sup>C NMR** (101 MHz, DMSO-*d*<sub>6</sub>) δ 200.5, 173.8, 167.0, 153.0, 134.7, 133.4, 131.9, 131.5, 131.2, 130.0, 129.3, 128.7, 128.0, 127.5, 126.4, 88.5, 52.4, 49.9, 36.1; **IR** (neat): 3425, 2918, 1779, 1719, 1667, 1207, 1140, 913, 714, 489 cm<sup>-1</sup>; **HRMS** (ESI): *m/z* for [M+H]<sup>+</sup>: calcd 498.0311, found 498.0309; **HPLC**: Daicel Chiralpak IB, *n*-hexane/*i*-PrOH = 80/20, flow rate = 1 mL/min, λ = 254 nm, *t*<sub>major</sub> = 15.73 min and *t*<sub>minor</sub> = 21.68 min.

***N*-((2*S*,3*S*,4*R*)-4'-chloro-1',5-dioxo-3-phenyl-1',3',4,5-tetrahydro-3*H*-spiro[furan-2,2'-inden]-4-yl) benzamide (3g):**

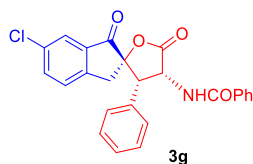

Yellow solid in 78% isolated yield (101mg, >20:1 dr);  $[\alpha]_{\text{D}}^{20} = +109$  (c = 1.0, DMSO, 99% ee); **m.p.** = 180.5-181.7 °C; **<sup>1</sup>H NMR** (400 MHz, DMSO- $d_6$ )  $\delta$  8.71 (d,  $J$  = 7.0 Hz, 1H), 7.85 (d,  $J$  = 8.0 Hz, 1H), 7.65 (s, 1H), 7.59 (d,  $J$  = 7.8 Hz, 1H), 7.52-7.43 (m, 3H), 7.41-7.27 (m, 5H), 7.21-7.11 (m, 2H), 6.08-5.91 (m, 1H), 4.39 (d,  $J$  = 8.4 Hz, 1H), 3.35 (d,  $J$  = 17.9 Hz, 1H), 3.02 (d,  $J$  = 18.3 Hz, 1H); **<sup>13</sup>C NMR**(101 MHz, DMSO- $d_6$ )  $\delta$  200.3, 173.8, 167.0, 153.0, 141.7, 134.7, 133.3, 131.5, 131.2, 129.3, 129.0, 128.7, 128.0, 127.5, 127.0, 126.4, 88.5, 52.5, 49.9, 36.2; **IR** (neat): 3399, 2923, 1788, 1717, 1667, 1519, 1101, 702, 635, 493  $\text{cm}^{-1}$ ; **HRMS** (ESI):  $m/z$  for  $[M+H]^+$ : calcd 432.0997, found 432.0995; **HPLC**: Daicel Chiralpak IB, *n*-hexane/*i*-PrOH = 80/20, flow rate = 1 mL/min,  $\lambda$  = 254 nm,  $t_{\text{major}}$  = 17.12 min and  $t_{\text{minor}}$  = 13.33 min.

**((2S,3S,4R)-4'-bromo-1',5-dioxo-3-phenyl-1',3',4,5-tetrahydro-3H-spiro[furan-2,2'-inden]-4-yl)benzamide (3h):**

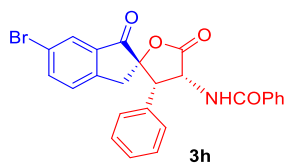

Yellow solid in 39% isolated yield (56mg, >20:1 dr);  $[\alpha]_{\text{D}}^{20} = +172$  (c = 1.0, DMSO, 99% ee); **m.p.** = 236.1-237.4 °C; **<sup>1</sup>H NMR** (400 MHz, DMSO- $d_6$ )  $\delta$  8.71 (d,  $J$  = 7.3 Hz, 1H), 7.99 (s, 1H), 7.92 (d,  $J$  = 7.8 Hz, 1H), 7.52-7.43 (m, 4H), 7.41-7.28 (m, 5H), 7.19-7.10 (m, 2H), 6.02-5.90 (m, 1H), 4.39 (d,  $J$  = 8.7 Hz, 1H), 3.31 (d,  $J$  = 17.6 Hz, 1H), 2.96 (d,  $J$  = 18.3 Hz, 1H); **<sup>13</sup>C NMR** (101 MHz, DMSO- $d_6$ )  $\delta$  200.3, 173.8, 167.0, 150.1, 139.1, 134.6, 133.3, 131.5, 129.3, 129.1, 128.7, 128.0, 127.5, 127.1, 121.5, 88.7, 52.4, 49.8, 36.1; **IR** (neat): 3384, 2933, 1798, 1714, 1662, 1524, 1132, 1084, 633, 509  $\text{cm}^{-1}$ ; **HRMS** (ESI):  $m/z$  for  $[M+H]^+$ : calcd 476.0492, found 476.0491; **HPLC**: Daicel Chiralpak IB, *n*-hexane/*i*-PrOH = 80/20, flow rate = 1 mL/min,  $\lambda$  = 254 nm,  $t_{\text{major}}$  = 13.19 min and  $t_{\text{minor}}$  = 17.52 min.

***N*-((2S,3S,4R)-3-(4-methoxyphenyl)-1',5-dioxo-1',3',4,5-tetrahydro-3H-spiro[furan-2,2'-inden]-4-yl)benzamide (3i):**

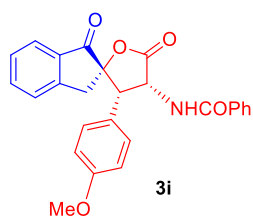

Yellow solid in 85% isolated yield (109mg, >20:1 dr);  $[\alpha]_{\text{D}}^{20} = +147$  (c = 1.0, DMSO, 99% ee); **m.p.** = 207.1-208.4 °C; **<sup>1</sup>H NMR** (400 MHz, DMSO- $d_6$ )  $\delta$  8.69 (d,  $J$  = 7.6 Hz, 1H), 7.84 (d,  $J$  = 7.6 Hz, 1H), 7.76 (t,  $J$  = 7.9 Hz, 1H), 7.60-7.45 (m, 5H), 7.41-7.33 (m, 2H), 7.10 (d,  $J$  = 8.7 Hz, 2H), 6.91 (d,  $J$  = 8.7 Hz, 2H), 6.05-5.97 (m, 1H), 4.30 (d,  $J$  = 8.8 Hz, 1H), 3.74 (s, 3H), 3.33 (d,  $J$  = 18.2 Hz, 1H), 3.03 (d,  $J$  = 18.2 Hz, 1H); **<sup>13</sup>C NMR**(101 MHz, DMSO- $d_6$ )  $\delta$  201.5, 174.0, 167.0, 158.7, 151.0, 136.8, 133.3, 132.4, 131.5, 130.4, 128.5, 128.1, 127.5, 126.9, 126.6, 124.8, 114.1, 88.8, 55.0, 52.4, 49.4, 36.3; **IR** (neat): 3360, 2917, 1791, 1708, 1662, 1258, 1185, 931, 754, 471  $\text{cm}^{-1}$ ; **HRMS** (ESI):  $m/z$  for  $[M+H]^+$ : calcd 428.1492, found 428.1491; **HPLC**: Daicel Chiralpak IB, *n*-hexane/*i*-PrOH = 80/20, flow rate = 1 mL/min,  $\lambda$  = 254 nm,  $t_{\text{major}}$  = 17.64 min and  $t_{\text{minor}}$  = 26.98 min.

***N*-((2*S*,3*S*,4*R*)-1',5-dioxo-3-(*p*-tolyl)-1',3',4,5-tetrahydro-3*H*-spiro[furan-2,2'-inden]-4-yl)benzamide (3j):**

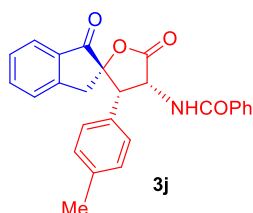

Yellow solid in 70% isolated yield (86mg, >20:1 dr);  $[\alpha]_{\text{D}}^{20} = +120$  (c = 1.0, DMSO, 97% ee); **m.p.** = 239.5-240.9 °C; **<sup>1</sup>H NMR** (400 MHz, DMSO-*d*<sub>6</sub>) δ 8.68 (d, *J* = 7.6 Hz, 1H), 7.83 (d, *J* = 7.7 Hz, 1H), 7.76 (t, *J* = 7.3 Hz, 1H), 7.56-7.45 (m, 5H), 7.39-7.33 (m, 2H), 7.16 (d, *J* = 7.9 Hz, 2H), 7.05 (d, *J* = 7.9 Hz, 2H), 6.03-5.93 (m, 1H), 4.29 (d, *J* = 8.8 Hz, 1H), 3.28 (d, *J* = 18.2 Hz, 1H), 2.98 (d, *J* = 18.2 Hz, 1H), 2.29 (s, 3H); **<sup>13</sup>C NMR** (101 MHz, DMSO-*d*<sub>6</sub>) δ 201.5, 174.0, 167.0, 151.1, 136.9, 133.3, 132.4, 132.2, 131.9, 131.6, 129.2, 128.5, 128.1, 127.5, 126.9, 124.8, 88.7, 52.4, 49.6, 36.3, 20.7; **IR** (neat): 3336, 2926, 1796, 1709, 1661, 1340, 1124, 998, 748, 567 cm<sup>-1</sup>; **HRMS** (ESI): *m/z* for [M+H]<sup>+</sup>: calcd 412.1543, found 412.1542; **HPLC**: Daicel Chiralpak IA, *n*-hexane/*i*-PrOH = 50/50, flow rate = 1 mL/min, λ = 254 nm, *t*<sub>major</sub> = 14.53 min and *t*<sub>minor</sub> = 10.41 min.

***N*-((2*S*,3*S*,4*R*)-3-(4-fluorophenyl)-1',5-dioxo-1',3',4,5-tetrahydro-3*H*-spiro[furan-2,2'-inden]-4-yl)benzamide (3k):**

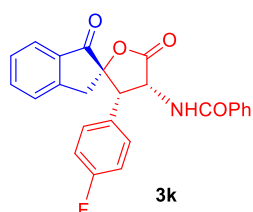

Yellow solid in 80% isolated yield (100mg, >20:1 dr);  $[\alpha]_{\text{D}}^{20} = +148$  (c = 1.0, DMSO, 99% ee); **m.p.** = 200.3-201.5 °C; **<sup>1</sup>H NMR** (400 MHz, DMSO-*d*<sub>6</sub>) δ 8.78 (d, *J* = 7.5 Hz, 1H), 7.85 (d, *J* = 7.6 Hz, 1H), 7.78 (t, *J* = 7.5 Hz, 1H), 7.57-7.47 (m, 5H), 7.41-7.35 (m, 2H), 7.24-7.17 (m, 4H), 6.07-5.95 (m, 1H), 4.43 (d, *J* = 8.8 Hz, 1H), 3.39 (d, *J* = 18.1 Hz, 1H), 3.03 (d, *J* = 18.2 Hz, 1H); **<sup>13</sup>C NMR** (101 MHz, DMSO-*d*<sub>6</sub>) δ 201.3, 173.8, 167.0, 161.58 (d, *J* = 244.1 Hz), 151.1, 136.9, 133.3, 132.4, 131.9, 131.1, 131.1, 128.6, 128.1, 127.5, 126.9, 124.8, 115.6, 115.4, 88.5, 52.5, 49.1, 36.3; **<sup>19</sup>F NMR** (376 MHz, DMSO) δ -114.39. **IR** (neat): 3349, 2921, 1793, 1698, 1337, 1224, 1195, 921, 732, 453 cm<sup>-1</sup>; **HRMS** (ESI): *m/z* for [M+H]<sup>+</sup>: calcd 416.1293, found 416.1290; **HPLC**: Daicel Chiralpak IA, *n*-hexane/*i*-PrOH = 50/50, flow rate = 1 mL/min, λ = 254 nm, *t*<sub>major</sub> = 18.92 min and *t*<sub>minor</sub> = 9.89 min.

***N*-((2*S*,3*S*,4*R*)-3-(4-chlorophenyl)-1',5-dioxo-1',3',4,5-tetrahydro-3*H*-spiro[furan-2,2'-inden]-4-yl)benzamide (3l):**

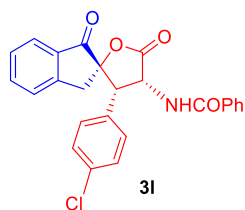

Yellow solid in 72% isolated yield (93mg, >20:1 dr);  $[\alpha]_{\text{D}}^{20} = +152$  (c = 1.0, DMSO, 99% ee); **m.p.** = 216.3-217.4 °C; **<sup>1</sup>H NMR** (400 MHz, CDCl<sub>3</sub>) δ 7.87 (d, *J* = 7.7 Hz, 1H), 7.70-7.64 (m, 1H), 7.50-7.39

(m, 4H), 7.37-7.29 (m, 5H), 7.09 (d,  $J = 8.4$  Hz, 2H), 6.33 (d,  $J = 5.2$  Hz, 1H), 6.06-5.98 (m, 1H), 4.31 (d,  $J = 8.3$  Hz, 1H), 3.42 (d,  $J = 18.0$  Hz, 1H), 3.13 (d,  $J = 18.0$  Hz, 1H);  $^{13}\text{C NMR}$  (101 MHz,  $\text{CDCl}_3$ )  $\delta$  200.2, 174.8, 167.3, 150.2, 136.9, 134.5, 133.2, 132.7, 132.0, 130.1, 129.5, 128.7, 126.8, 126.5, 125.7, 89.0, 53.7, 51.2, 36.6; **IR** (neat): 3350, 2923, 1795, 1703, 1663, 1326, 1220, 1192, 726, 522  $\text{cm}^{-1}$ ; **HRMS** (ESI):  $m/z$  for  $[\text{M}+\text{H}]^+$ : calcd 432.0997 found 432.0995; **HPLC**: Daicel Chiralpak IA,  $n$ -hexane/ $i$ -PrOH = 50/50, flow rate = 1 mL/min,  $\lambda = 254$  nm,  $t_{\text{major}} = 23.54$  min and  $t_{\text{minor}} = 10.71$  min.  
***N*-((2S,3S,4R)-3-(4-bromophenyl)-1',5-dioxo-1',3',4,5-tetrahydro-3H-spiro[furan-2,2'-inden]-4-yl)benzamide (3m):**

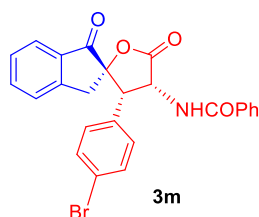

Yellow solid in 80% isolated yield (111mg, >20:1 dr);  $[\alpha]_{\text{D}}^{20} = +158$  ( $c = 1.0$ ,  $\text{CDCl}_3$ , 99% ee); **m.p.** = 204.1-205.5  $^{\circ}\text{C}$ ;  $^1\text{H NMR}$  (400 MHz,  $\text{CDCl}_3$ )  $\delta$  7.87 (d,  $J = 7.7$  Hz, 1H), 7.69-7.64 (m, 1H), 7.50-7.39 (m, 6H), 7.37-7.31 (m, 3H), 7.03 (d,  $J = 8.5$  Hz, 2H), 6.33 (d,  $J = 5.5$  Hz, 1H), 6.05-5.98 (m, 1H), 4.30 (d,  $J = 8.3$  Hz, 1H), 3.41 (d,  $J = 18.0$  Hz, 1H), 3.13 (d,  $J = 18.0$  Hz, 1H);  $^{13}\text{C NMR}$  (101 MHz,  $\text{CDCl}_3$ )  $\delta$  200.1, 174.8, 167.3, 150.2, 136.9, 133.7, 133.1, 132.7, 132.5, 132.0, 130.4, 128.7, 126.8, 126.5, 125.7, 122.6, 88.9, 53.7, 51.3, 36.6; **IR**(neat): 3337, 2923, 1795, 1660, 1157, 1069, 725, 515  $\text{cm}^{-1}$ ; **HRMS** (ESI):  $m/z$  for  $[\text{M}+\text{H}]^+$ : calcd 476.0492, found 476.0490; **HPLC**: Daicel Chiralpak IB,  $n$ -hexane/ $i$ -PrOH = 70/30, flow rate = 1 mL/min,  $\lambda = 254$  nm,  $t_{\text{major}} = 12.43$  min and  $t_{\text{minor}} = 26.42$  min.  
***N*-((2S,3S,4R)-3-(3-methoxyphenyl)-1',5-dioxo-1',3',4,5-tetrahydro-3H-spiro[furan-2,2'-inden]-4-yl)benzamide (3n):**

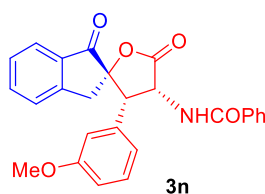

Yellow solid in 75% isolated yield (96mg, >20:1 dr);  $[\alpha]_{\text{D}}^{20} = +148$  ( $c = 1.0$ , DMSO, 99% ee); **m.p.** = 180.0-181.4  $^{\circ}\text{C}$ ;  $^1\text{H NMR}$  (400 MHz,  $\text{DMSO-d}_6$ )  $\delta$  8.73 (d,  $J = 7.7$  Hz, 1H), 7.84 (d,  $J = 7.5$  Hz, 1H), 7.77 (t,  $J = 7.5$  Hz, 1H), 7.56-7.45 (m, 5H), 7.39-7.33 (m, 2H), 7.27 (t,  $J = 7.9$  Hz, 1H), 6.92-6.87 (m, 1H), 6.76-6.68 (m, 2H), 6.02 (t,  $J = 8.2$  Hz, 1H), 4.31 (d,  $J = 8.8$  Hz, 1H), 3.72 (s, 3H), 3.41 (d,  $J = 18.3$  Hz, 1H), 3.06 (d,  $J = 18.3$  Hz, 1H);  $^{13}\text{C NMR}$  (101 MHz,  $\text{DMSO-d}_6$ )  $\delta$  202.0, 174.4, 167.6, 159.7, 151.7, 137.4, 136.7, 133.9, 132.8, 132.0, 130.3, 129.0, 128.6, 128.0, 127.4, 125.3, 121.9, 115.3, 113.8, 89.0, 55.4, 53.0, 50.4, 36.8; **IR** (neat): 3266, 2922, 1783, 1716, 1665, 1326, 1227, 1173, 719, 472  $\text{cm}^{-1}$ ; **HRMS** (ESI):  $m/z$  for  $[\text{M}+\text{H}]^+$ : calcd 428.1492, found 428.1490; **HPLC**: Daicel Chiralpak IA,  $n$ -hexane/ $i$ -PrOH = 50/50, flow rate = 1 mL/min,  $\lambda = 254$  nm,  $t_{\text{major}} = 11.01$  min and  $t_{\text{minor}} = 8.60$  min.  
***N*-((2S,3S,4R)-3-(2-methoxyphenyl)-1',5-dioxo-1',3',4,5-tetrahydro-3H-spiro[furan-2,2'-inden]-4-yl)benzamide (3o):**

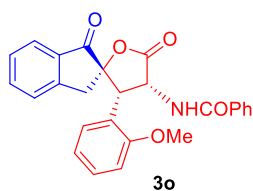

Yellow solid in 88% isolated yield (113mg, >20:1 dr);  $[\alpha]_{\text{D}}^{20} = +138$  (c = 1.0, DMSO, 99% ee); **m.p.** = 126.9-128.6 °C; **<sup>1</sup>H NMR** (400 MHz, DMSO-*d*<sub>6</sub>) δ 8.17 (d, *J* = 14.0 Hz, 1H), 7.87-7.80 (m, 1H), 7.78-7.71 (m, 1H), 7.57- 7.28 (m, 8H), 7.13-6.96 (m, 2H), 6.90-6.75 (m, 1H), 5.87-5.61 (m, 1H), 4.36 (d, *J* = 6.2 Hz, 1H), 3.76 (s, 3H), 3.31 (d, *J* = 22.7 Hz, 2H), 2.90 (d, *J* = 18.1 Hz, 1H); **<sup>13</sup>C NMR** (101 MHz, DMSO-*d*<sub>6</sub>) δ 202.1, 173.9, 167.3, 157.2, 151.1, 136.8, 133.5 132.3, 131.4, 129.7, 128.5, 128.0, 127.3, 126.8, 124.8, 122.7, 120.6, 110.9, 87.4, 55.0, 51.3, 36.0; **IR** (neat): 3339, 2937, 1783, 1718, 1664, 1334, 1226, 1021, 749, 491 cm<sup>-1</sup>; **HRMS**. (ESI): *m/z* for [M+H]<sup>+</sup>: calcd 428.1492, found 428.1491; **HPLC**: Daicel Chiralpak IB, *n*-hexane/*i*-PrOH = 80/20, flow rate = 1 mL/min, λ = 254 nm, *t*<sub>major</sub> = 13.92 min and *t*<sub>minor</sub> = 15.61 min.

***N*-((3S,4R)-3-(2-chlorophenyl)-1',5-dioxo-1',3',4,5-tetrahydro-3H-spiro[furan-2,2'-inden]-4-yl)benzamide (3p):**

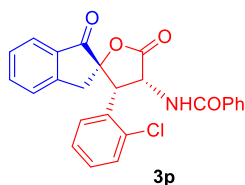

Yellow solid in 75% isolated yield (97mg, >20:1 dr);  $[\alpha]_{\text{D}}^{20} = +175$  (c = 1.0, DMSO, 98% ee); **m.p.** = 212.1-213.8 °C; **<sup>1</sup>H NMR** (400 MHz, DMSO-*d*<sub>6</sub>) δ 8.85 (d, *J* = 7.2 Hz, 1H), 7.87 (d, *J* = 7.6 Hz, 1H), 7.79 (t, *J* = 7.4 Hz, 1H), 7.59-7.34 (m, 11H), 6.23-6.05 (m, 1H), 4.76 (d, *J* = 8.8 Hz, 1H), 3.54 (d, *J* = 18.1 Hz, 1H), 3.06 (d, *J* = 18.2 Hz, 1H); **<sup>13</sup>C NMR** (101 MHz, DMSO-*d*<sub>6</sub>) δ 201.2, 173.5, 167.1, 151.1, 137.1, 134.6, 133.3, 131.8, 131.6, 130.0, 129.7, 128.7, 128.1, 127.8, 127.5, 126.9, 124.9, 87.8, 52.0, 46.0, 36.2; **IR** (neat): 3375, 2926, 1789, 1713, 1667, 1328, 1119, 879, 744, 457 cm<sup>-1</sup>; **HRMS** (ESI): *m/z* for [M+H]<sup>+</sup>: calcd 432.0997, found 432.0996; **HPLC**: Daicel Chiralpak IA, *n*-hexane/*i*-PrOH = 50/50, flow rate = 1 mL/min, λ = 254 nm, *t*<sub>major</sub> = 10.78 min and *t*<sub>minor</sub> = 8.78 min.

***N*-((3S,4R)-3-(3,4-dimethylphenyl)-1',5-dioxo-1',3',4,5-tetrahydro-3H-spiro[furan-2,2'-inden]-4-yl)benzamide (3q):**

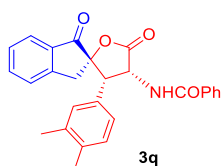

Yellow solid in 74% isolated yield (94mg, >20:1 dr);  $[\alpha]_{\text{D}}^{20} = +115$  (c = 1.0, DMSO, 98% ee); **m.p.** = 204.8-206.4 °C; **<sup>1</sup>H NMR** (400 MHz, DMSO-*d*<sub>6</sub>) δ 8.70 (d, *J* = 7.7 Hz, 1H), 7.83 (d, *J* = 7.6 Hz, 1H), 7.78-7.71 (m, 1H), 7.59 -7.44 (m, 6H), 7.40-7.33 (m, 2H), 7.10 (d, *J* = 7.7 Hz, 1H), 6.94 (s, 1H), 6.88 (d, *J* = 7.7 Hz, 1H), 6.05-5.98 (m, 1H), 4.24 (d, *J* = 8.8 Hz, 1H), 3.31 (d, *J* = 18.2 Hz, 1H), 3.01 (d, *J* = 18.2 Hz, 1H), 2.19 (s, 3H), 2.18 (s, 3H); **<sup>13</sup>C NMR** (101 MHz, DMSO-*d*<sub>6</sub>) δ 201.6, 174.1, 167.0, 151.1, 136.8, 136.5, 135.7, 133.3, 132.3, 132.0, 131.5, 130.2, 129.7, 128.5, 128.1, 127.6, 126.9, 126.7, 124.8, 88.7, 52.3, 49.7, 36.3, 19.4, 19.0; **IR** (neat): 3364, 2923, 1791, 1707, 1668, 1320, 1227, 1168, 756, 466 cm<sup>-1</sup>; **HRMS** (ESI): *m/z* for [M+H]<sup>+</sup>: calcd 426.1700, found 426.1701; **HPLC**: Daicel Chiralpak IB, *n*-hexane/*i*-PrOH = 80/20, flow rate = 1 mL/min, λ = 254 nm, *t*<sub>major</sub> = 15.48 min and *t*<sub>minor</sub> = 13.85 min.



***N*-((2*S*,3*S*,4*R*)-3-(3-bromo-4-chlorophenyl)-1',5-dioxo-1',3',4,5-tetrahydro-3*H*-spiro[furan-2,2'-inden]-4-yl)benzamide (3r):**

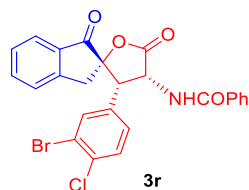

Yellow solid in 80% isolated yield (122mg, >20:1 dr);  $[\alpha]_D^{20} = +115$  (c = 1.0, DMSO, 99% ee); **m.p.** = 158.7-160.4 °C; **<sup>1</sup>H NMR** (400 MHz, CDCl<sub>3</sub>) δ 7.87 (d, *J* = 7.7 Hz, 1H), 7.71-7.65 (m, 1H), 7.50-7.44 (m, 4H), 7.44-7.39 (m, 2H), 7.38 – 7.33 (m, 3H), 7.08 – 7.03 (m, 1H), 6.44 (d, *J* = 5.2 Hz, 1H), 6.04 – 5.95 (m, 1H), 4.33 (d, *J* = 8.3 Hz, 1H), 3.44 (d, *J* = 18.0 Hz, 1H), 3.13 (d, *J* = 18.0 Hz, 1H); **<sup>13</sup>C NMR** (101 MHz, CDCl<sub>3</sub>) δ 199.9, 174.5, 167.5, 150.1, 137.0, 135.0, 134.8, 134.0, 132.9, 132.6, 132.1, 131.0, 128.8, 128.7, 128.5, 126.9, 126.5, 125.7, 123.4, 88.8, 53.9, 51.0, 36.6; **IR** (neat): 3364, 2923, 1791, 1707, 1668, 1320, 1227, 1168, 756, 466 cm<sup>-1</sup>; **HRMS** (ESI): *m/z* for [M+H]<sup>+</sup>: calcd 510.0102, found 510.0103; **HPLC**: Daicel Chiralpak IB, *n*-hexane/*i*-PrOH = 80/20, flow rate = 1 mL/min, λ = 254 nm, *t*<sub>major</sub> = 11.45min and *t*<sub>minor</sub> = 24.14min.

***N*-((2*S*,3*S*,4*R*)-3-(benzo[*d*][1,3]dioxol-4-yl)-1',5-dioxo-1',3',4,5-tetrahydro-3*H*-spiro[furan-2,2'-inden]-4-yl)benzamide (3s):**

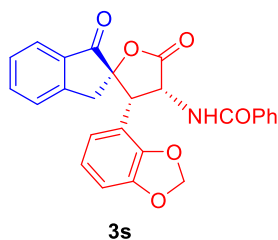

Yellow solid in 80% isolated yield (105mg, >20:1 dr);  $[\alpha]_D^{20} = +74$  (c = 1.0, DMSO, 97% ee); **m.p.** = 253.1-254.4 °C; **<sup>1</sup>H NMR** (400 MHz, CDCl<sub>3</sub>) δ 7.78 (d, *J* = 7.6 Hz, 1H), 7.58 (t, *J* = 7.4 Hz, 1H), 7.44-7.34 (m, 4H), 7.31- 7.23 (m, 3H), 6.67 (d, *J* = 7.9 Hz, 1H), 6.57-6.47 (m, 2H), 6.22 (d, *J* = 5.9 Hz, 1H), 6.02-5.94 (m, 1H), 5.88 (d, *J* = 6.1 Hz, 2H), 4.10 (d, *J* = 8.3 Hz, 1H), 3.34 (d, *J* = 18.0 Hz, 1H), 3.14 (d, *J* = 18.0 Hz, 1H); **<sup>13</sup>C NMR**(101 MHz, CDCl<sub>3</sub>) δ 199.4, 174.0, 166.3, 149.3, 147.4, 146.7, 135.7, 132.4, 131.7, 130.8, 127.6, 127.1, 125.9, 125.4, 124.6, 121.7, 107.9, 107.4, 106.6, 100.4, 88.1, 52.5, 50.4, 35.5; **IR** (neat): 3396, 2930, 1790, 1718, 1660, 1331, 1218, 873, 562, 471 cm<sup>-1</sup>; **HRMS** (ESI): *m/z* for [M+H]<sup>+</sup>: calcd 442.1285, found 442.1285; **HPLC**: Daicel Chiralpak IB, *n*-hexane/*i*-PrOH = 80/20, flow rate = 1 mL/min, λ = 254 nm, *t*<sub>major</sub> = 24.00 min and *t*<sub>minor</sub> = 57.42 min.

***N*-((3*R*,4*R*)-3-(furan-2-yl)-1',5-dioxo-1',3',4,5-tetrahydro-3*H*-spiro[furan-2,2'-inden]-4-yl)benzamide (3t):**

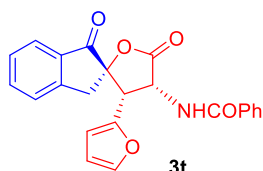

Yellow solid in 74% isolated yield (86mg, >20:1 dr);  $[\alpha]_D^{20} = +140$  (c = 1.0, DMSO, 90% ee); **m.p.** = 188.7-190.1 °C; **<sup>1</sup>H NMR** (400 MHz, DMSO-*d*<sub>6</sub>) δ 8.77 (d, *J* = 7.7 Hz, 1H), 7.87-7.75 (m, 2H), 7.71 (s, 1H), 7.66 (d, *J* = 7.4 Hz, 2H), 7.60-7.48 (m, 3H), 7.45-7.37 (m, 2H), 6.49-6.26 (m, 2H), 5.96-5.84 (m, 1H), 4.53 (d, *J* = 8.8 Hz, 1H), 3.38 (d, *J* = 17.2 Hz, 1H), 3.03 (d, *J* = 18.2 Hz, 1H); **<sup>13</sup>C NMR**(101 MHz,

DMSO- $d_6$ )  $\delta$  201.0, 173.2, 167.3, 151.0, 148.9, 143.9, 136.9, 133.3, 132.4, 131.6, 128.6, 128.1, 127.7, 126.9, 124.8, 111.0, 110.1, 87.5, 51.3, 44.1, 36.0; **IR** (neat): 3441, 2925, 1784, 1707, 1668, 1232, 1164, 786, 597, 467  $\text{cm}^{-1}$ ; **HRMS** (ESI):  $m/z$  for  $[M+H]^+$ : calcd 408.1206, found 410.0998; **HPLC**: Daicel Chiralpak IB, *n*-hexane/*i*-PrOH = 50/50, flow rate = 1 mL/min,  $\lambda$  = 254 nm,  $t_{\text{major}}$  = 12.64 min and  $t_{\text{minor}}$  = 13.57 min.

***N*-((3*S*,4*R*)-1',5-dioxo-3-(thiophen-2-yl)-1',3',4,5-tetrahydro-3*H*-spiro[furan-2,2'-inden]-4-yl)benzamide (3u):**

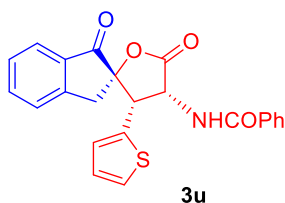

Yellow solid in 74% isolated yield (89mg, >20:1 dr);  $[\alpha]_{\text{D}}^{20} = +207$  ( $c = 1.0$ , DMSO, 99% ee); **m.p.** = 212.6-213.9  $^{\circ}\text{C}$ ;  **$^1\text{H NMR}$**  (400 MHz, DMSO- $d_6$ )  $\delta$  8.78 (d,  $J = 7.5$  Hz, 1H), 7.83 (d,  $J = 7.6$  Hz, 1H), 7.79-7.73 (m, 1H), 7.67-7.61 (m, 2H), 7.58-7.48 (m, 4H), 7.45-7.36 (m, 2H), 7.08-7.01 (m, 1H), 6.99-6.92 (m, 1H), 5.96-5.85 (m, 1H), 4.76 (d,  $J = 8.6$  Hz, 1H), 3.43 (d,  $J = 18.3$  Hz, 1H), 3.27 (d,  $J = 18.3$  Hz, 1H);  **$^{13}\text{C NMR}$** (101 MHz, DMSO- $d_6$ )  $\delta$  201.0, 173.3, 167.2, 151.2, 136.9, 135.7, 133.3, 132.6, 131.6, 128.6, 128.1, 127.6, 127.3, 126.9, 126.3, 124.7, 88.6, 52.7, 45.6, 36.4; **IR** (neat): 3433, 2926, 1778, 1708, 1670, 1327, 1234, 1128, 909, 702, 466  $\text{cm}^{-1}$ ; **HRMS** (ESI):  $m/z$  for  $[M+H]^+$ : calcd 402.1158, found 404.0950; **HPLC**: Daicel Chiralpak IB, *n*-hexane/*i*-PrOH = 50/50, flow rate = 1 mL/min,  $\lambda$  = 254 nm,  $t_{\text{major}}$  = 10.28 min and  $t_{\text{minor}}$  = 9.33 min.

***N*-((3*S*,4*R*)-3-(naphthalen-1-yl)-1',5-dioxo-1',3',4,5-tetrahydro-3*H*-spiro[furan-2,2'-inden]-4-yl)benzamide (3v):**

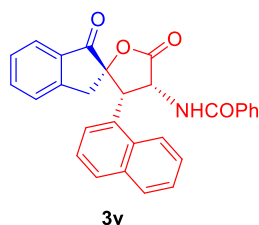

Yellow solid in 72% isolated yield (97mg, >20:1 dr);  $[\alpha]_{\text{D}}^{20} = +136$  ( $c = 1.0$ , DMSO, 99% ee); **m.p.** = 167.6-168.9  $^{\circ}\text{C}$ ;  **$^1\text{H NMR}$**  (400 MHz, DMSO- $d_6$ )  $\delta$  8.60 (d,  $J = 8.1$  Hz, 1H), 7.98-7.85 (m, 4H), 7.75-7.69 (m, 1H), 7.66-7.60 (m, 1H), 7.57-7.51 (m, 2H), 7.44-7.29 (m, 4H), 7.23-7.15 (m, 4H), 6.42-6.33 (m, 1H), 5.30 (d,  $J = 8.7$  Hz, 1H), 3.56 (d,  $J = 18.3$  Hz, 1H), 3.11 (d,  $J = 18.3$  Hz, 1H);  **$^{13}\text{C NMR}$** (101 MHz, DMSO- $d_6$ )  $\delta$  201.5, 174.2, 167.4, 151.0, 136.8, 133.4, 132.4, 131.2, 130.8, 128.5, 128.2, 127.8, 127.3, 126.8, 126.2, 125.6, 124.9, 123.2, 88.5, 52.9, 44.0, 36.50; **IR** (neat): 3399, 2970, 1789, 1717, 1662, 1513, 1087, 902, 785, 575  $\text{cm}^{-1}$ ; **HRMS** (ESI):  $m/z$  for  $[M+H]^+$ : calcd 468.1570, found 470.1360; **HPLC**: Daicel Chiralpak IB, *n*-hexane/*i*-PrOH = 80/20, flow rate = 1 mL/min,  $\lambda$  = 254 nm,  $t_{\text{major}}$  = 16.22 min and  $t_{\text{minor}}$  = 20.35min.

***N*-((3*S*,4*R*)-3-(naphthalen-2-yl)-1',5-dioxo-1',3',4,5-tetrahydro-3*H*-spiro[furan-2,2'-inden]-4-yl)benzamide (3w):**

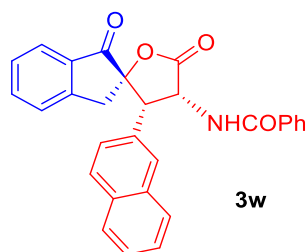

Yellow solid in 71% isolated yield (95mg, >20:1 dr);  $[\alpha]_{\text{D}}^{20} = +142$  ( $c = 1.0$ , DMSO, 99% ee); **m.p.** = 207.6-208.9 °C; **<sup>1</sup>H NMR** (400 MHz, DMSO- $d_6$ )  $\delta$  8.83 (d,  $J = 7.2$  Hz, 1H), 7.97-7.89 (m, 2H), 7.89-7.81 (m, 2H), 7.79-7.69 (m, 2H), 7.57-7.44 (m, 6H), 7.42-7.36 (m, 1H), 7.35-7.30 (m, 1H), 7.30-7.19 (m, 2H), 6.17-6.06 (m, 1H), 4.54 (d,  $J = 8.7$  Hz, 1H), 3.39 (d,  $J = 18.3$  Hz, 1H), 3.02 (d,  $J = 18.2$  Hz, 1H); **<sup>13</sup>C NMR** (101 MHz, DMSO- $d_6$ )  $\delta$  201.5, 174.0, 167.0, 151.2, 136.9, 133.2, 132.8, 132.6, 132.2, 131.4, 128.6, 128.2, 128.0, 127.5, 126.8, 126.3, 124.8, 88.6, 52.6, 50.2, 36.3; **IR** (neat): 3349, 2917, 1791, 1705, 1661, 1345, 1211, 1185, 931, 749, 646, 480  $\text{cm}^{-1}$ ; **HRMS** (ESI):  $m/z$  for  $[M+H]^+$ : calcd 468.1570, found 470.1363; **HPLC**: Daicel Chiralpak IA, *n*-hexane/*i*-PrOH = 60/40, flow rate = 1 mL/min,  $\lambda = 254$  nm,  $t_{\text{major}} = 28.66$  min and  $t_{\text{minor}} = 46.62$  min.

***N*-((3S,4R)-3-cyclopropyl-1',5-dioxo-1',3',4,5-tetrahydro-3H-spiro[furan-2,2'-inden]-4-yl)benzamide (3x):**

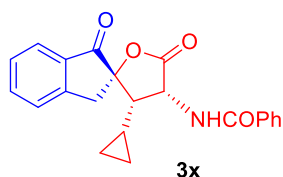

Yellow solid in 70% isolated yield (76mg, >20:1 dr);  $[\alpha]_{\text{D}}^{20} = +58$  ( $c = 1.0$ , DMSO, 73% ee); **m.p.** = 245.6-246.9 °C; **<sup>1</sup>H NMR** (400 MHz, DMSO- $d_6$ )  $\delta$  9.14 (d,  $J = 8.5$  Hz, 1H), 7.93 (d,  $J = 7.2$  Hz, 2H), 7.86-7.75 (m, 2H), 7.70-7.64 (m, 1H), 7.62-7.48 (m, 4H), 5.59-5.48 (m, 1H), 4.08 (d,  $J = 17.8$  Hz, 1H), 3.45 (d,  $J = 17.8$  Hz, 1H), 2.23 – 2.08 (m, 1H), 0.97 – 0.81 (m, 1H), 0.58 – 0.43 (m, 2H), 0.00 (d,  $J = 2.5$  Hz, 2H); **<sup>13</sup>C NMR** (101 MHz, DMSO- $d_6$ )  $\delta$  202.1, 174.2, 166.7, 151.3, 136.8, 133.5, 132.4, 131.7, 128.4, 127.5, 126.8, 124.6, 88.9, 54.9, 51.5, 48.5, 34.6, 8.4, 3.8, 3.4, 2.7; **IR** (neat): 3350, 2922, 1788, 1709, 1661, 1334, 1232, 1073, 998, 713, 572  $\text{cm}^{-1}$ ; **HRMS** (ESI):  $m/z$  for  $[M+H]^+$ : calcd 382.1414, found 384.1205; **HPLC**: Daicel Chiralpak IB, *n*-hexane/*i*-PrOH = 80/20, flow rate = 1 mL/min,  $\lambda = 254$  nm,  $t_{\text{major}} = 10.16$  min and  $t_{\text{minor}} = 15.48$  min.

***N*-((3R,4S,5S)-5-benzoyl-2-oxo-4-phenyltetrahydrofuran-3-yl)benzamide (3aa)**

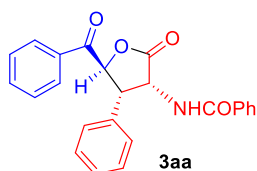

Yellow solid in 70% isolated yield (81mg, >20:1 dr);  $[\alpha]_{\text{D}}^{20} = +36$  ( $c = 1.0$ ,  $\text{CH}_2\text{Cl}_2$ , 98% ee); **m.p.** = 90.6-91.9 °C; **<sup>1</sup>H NMR** (400 MHz,  $\text{CDCl}_3$ )  $\delta$  7.85 (d,  $J = 7.6$  Hz, 2H), 7.59 (t,  $J = 7.4$  Hz, 1H), 7.48-7.40 (m, 2H), 7.38-7.27 (m, 6H), 7.25-7.16 (m, 4H), 6.07 (s, 1H), 6.00 (d,  $J = 5.9$  Hz, 1H), 5.18-5.10 (m, 1H), 4.26 (d,  $J = 8.6$  Hz, 1H); **<sup>13</sup>C NMR** (101 MHz,  $\text{CDCl}_3$ )  $\delta$  192.5, 174.3, 167.7, 135.4, 134.8, 133.1, 132.9, 132.0, 129.5, 129.3, 128.6, 127.6, 126.9, 82.7, 52.2, 47.7; **IR** (neat): 3345, 3030, 1792, 1654, 1562, 1151, 694, 510,  $\text{cm}^{-1}$ ; **HRMS** (ESI):  $m/z$  for  $[M+H]^+$ : calcd 386.1387, found

386.1386; **HPLC**: Daicel Chiralpak IB, *n*-hexane/*i*-PrOH = 80/20, flow rate = 1 mL/min,  $\lambda$  = 254 nm,  $t_{\text{major}}$  = 12.22 min and  $t_{\text{minor}}$  = 33.33 min.

***N*-((3*R*,4*S*,5*S*)-5-(4-methylbenzoyl)-2-oxo-4-phenyltetrahydrofuran-3-yl)benzamide (3ba)**

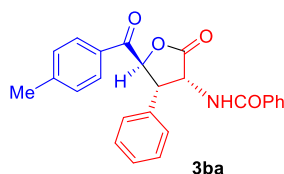

Yellow solid in 68% isolated yield (81mg, >20:1 dr);  $[\alpha]_{\text{D}}^{20}$  = +56 ( $c$  = 1.0,  $\text{CH}_2\text{Cl}_2$ , 99% ee); **m.p.** = 76.6-77.9 °C; **<sup>1</sup>H NMR** (400 MHz,  $\text{CDCl}_3$ )  $\delta$  7.75 (d,  $J$  = 8.2 Hz, 2H), 7.39-7.33 (m, 1H), 7.33-7.27 (m, 5H), 7.26-7.21 (m, 4H), 7.20-7.17 (m, 2H), 6.05 (d,  $J$  = 0.6 Hz, 1H), 5.94 (d,  $J$  = 6.2 Hz, 1H), 5.18-5.11 (m, 1H), 4.25 (d,  $J$  = 8.7 Hz, 1H), 2.37 (s, 3H); **<sup>13</sup>C NMR** (101 MHz,  $\text{CDCl}_3$ )  $\delta$  192.1, 174.4, 167.6, 146.0, 135.5, 133.2, 132.0, 130.4, 129.9, 129.5, 128.9, 128.5, 127.6, 126.8, 82.6, 52.2, 47.8, 21.9; **IR** (neat): 3356, 2927, 1800, 1667, 1494, 1137, 723, 634  $\text{cm}^{-1}$ ; **HRMS** (ESI):  $m/z$  for  $[\text{M}+\text{H}]^+$ : calcd 400.1543, found 400.1542; **HPLC**: Daicel Chiralpak IB, *n*-hexane/*i*-PrOH = 80/20, flow rate = 1 mL/min,  $\lambda$  = 254 nm,  $t_{\text{major}}$  = 10.97 min and  $t_{\text{minor}}$  = 21.07 min.

***N*-((3*R*,4*S*,5*S*)-5-(3-methylbenzoyl)-2-oxo-4-phenyltetrahydrofuran-3-yl)benzamide (3ca)**

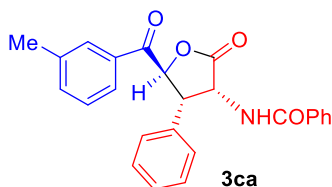

Yellow solid in 67% isolated yield (81mg, >20:1 dr);  $[\alpha]_{\text{D}}^{20}$  = +36 ( $c$  = 1.0,  $\text{CH}_2\text{Cl}_2$ , 92% ee); **m.p.** = 77.6-78.9 °C; **<sup>1</sup>H NMR** (400 MHz,  $\text{CDCl}_3$ )  $\delta$  7.78 (s, 1H), 7.67 (d,  $J$  = 7.7 Hz, 1H), 7.50-7.35 (m, 8H), 7.34-7.28 (m, 2H), 7.28-7.24 (m, 2H), 6.12 (s, 1H), 6.03 (d,  $J$  = 6.1 Hz, 1H), 5.26-5.18 (m, 1H), 4.33 (d,  $J$  = 8.7 Hz, 1H), 2.42 (s, 3H); **<sup>13</sup>C NMR** (101 MHz,  $\text{CDCl}_3$ )  $\delta$  192.7, 174.3, 167.6, 139.3, 135.5, 133.2, 132.9, 132.0, 129.5, 129.2, 129.0, 128.6, 127.6, 126.8, 125.8, 82.7, 52.2, 47.7, 21.4; **IR** (neat): 3337, 2921, 1786, 1656, 1157, 1149, 696, 511  $\text{cm}^{-1}$ ; **HRMS** (ESI):  $m/z$  for  $[\text{M}+\text{H}]^+$ : calcd 400.1543, found 400.1540; **HPLC**: Daicel Chiralpak IB, *n*-hexane/*i*-PrOH = 80/20, flow rate = 1 mL/min,  $\lambda$  = 254 nm,  $t_{\text{major}}$  = 11.74 min and  $t_{\text{minor}}$  = 25.07 min.

***N*-((3*R*,4*S*,5*S*)-5-(3-chlorobenzoyl)-2-oxo-4-phenyltetrahydrofuran-3-yl)benzamide (3da)**

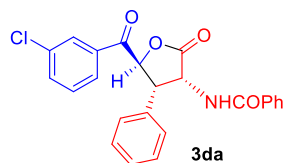

Yellow solid in 65% isolated yield (82mg, 10:1 dr);  $[\alpha]_{\text{D}}^{20}$  = +36 ( $c$  = 1.0,  $\text{CH}_2\text{Cl}_2$ , 97% ee); **m.p.** = 100.6-101.9 °C; **<sup>1</sup>H NMR** (400 MHz,  $\text{CDCl}_3$ )  $\delta$  7.98-7.92 (m, 1H), 7.79-7.74 (m, 1H), 7.66-7.61 (m, 1H), 7.49-7.42 (m, 2H), 7.41-7.35 (m, 5H), 7.32-7.24 (m, 4H), 6.13-6.05 (m, 2H), 5.23-5.15 (m, 1H), 4.34 (d,  $J$  = 8.9 Hz, 1H); **<sup>13</sup>C NMR** (101 MHz,  $\text{CDCl}_3$ )  $\delta$  191.6, 174.0, 167.7, 135.8, 135.1, 134.7, 134.5, 133.0, 132.0, 130.5, 129.6, 128.9, 128.6, 127.6, 126.8, 82.6, 52.2, 47.4; **IR** (neat): 3327, 2919, 1792, 1654, 1533, 1156, 700, 496  $\text{cm}^{-1}$ ; **HRMS** (ESI):  $m/z$  for  $[\text{M}+\text{H}]^+$ : calcd 420.0997, found 420.0993; **HPLC**: Daicel Chiralpak IB, *n*-hexane/*i*-PrOH = 80/20, flow rate = 1 mL/min,  $\lambda$  = 254 nm,  $t_{\text{major}}$  = 11.96 min and  $t_{\text{minor}}$  = 25.84 min.

***N*-((3*R*,4*S*,5*S*)-5-(3-bromobenzoyl)-2-oxo-4-phenyltetrahydrofuran-3-yl)benzamide (3ea)**

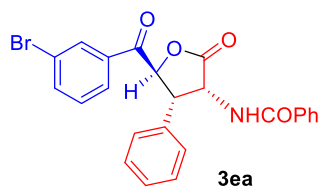

Yellow solid in 68% isolated yield (95mg, >20:1 dr);  $[\alpha]_{\text{D}}^{20} = +36$  ( $c = 1.0$ ,  $\text{CH}_2\text{Cl}_2$ , 97% ee); **m.p.** = 102.6-103.9 °C; **<sup>1</sup>H NMR** (400 MHz,  $\text{CDCl}_3$ )  $\delta$  8.13-8.08 (m, 1H), 7.85-7.76 (m, 2H), 7.46-7.35 (m, 7H), 7.33-7.28 (m, 2H), 7.27-7.24 (m, 2H), 6.12-6.03 (m, 2H), 5.22-5.15 (m, 1H), 4.34 (d,  $J = 9.2$  Hz, 1H); **<sup>13</sup>C NMR** (101 MHz,  $\text{CDCl}_3$ )  $\delta$  191.5, 174.0, 167.7, 137.6, 135.1, 134.7, 133.0, 132.0, 131.8, 130.7, 129.6, 128.8, 128.6, 127.6, 127.1, 126.9, 123.7, 82.6, 52.1, 47.4; **IR** (neat): 3309, 2927, 1782, 1656, 1527, 1152, 688  $\text{cm}^{-1}$ ; **HRMS** (ESI):  $m/z$  for  $[\text{M}+\text{H}]^+$ : calcd 464.0492, found 464.0493; **HPLC**: Daicel Chiralpak IB,  $n$ -hexane/ $i$ -PrOH = 80/20, flow rate = 1 mL/min,  $\lambda = 254$  nm,  $t_{\text{major}} = 13.10$  min and  $t_{\text{minor}} = 28.54$  min.

***N*-((3R,4S,5S)-2-oxo-4-phenyl-5-(thiophene-2-carbonyl)tetrahydrofuran-3-yl)benzamide (3fa)**

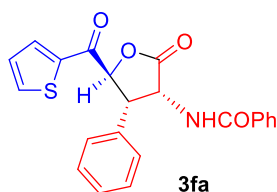

Yellow solid in 65% isolated yield (76mg, >20:1 dr);  $[\alpha]_{\text{D}}^{20} = +56$  ( $c = 1.0$ ,  $\text{CH}_2\text{Cl}_2$ , 93% ee); **m.p.** = 111.6-112.9 °C; **<sup>1</sup>H NMR** (400 MHz,  $\text{DMSO}-d_6$ )  $\delta$  8.88 (d,  $J = 7.6$  Hz, 1H), 8.17 (d,  $J = 4.6$  Hz, 1H), 7.90 (d,  $J = 3.3$  Hz, 1H), 7.56 (d,  $J = 7.4$  Hz, 2H), 7.52-7.46 (m, 1H), 7.42-7.36 (m, 2H), 7.31-7.21 (m, 6H), 6.30 (d,  $J = 6.0$  Hz, 1H), 5.02 (t,  $J = 8.6$  Hz, 1H), 4.29-4.17 (m, 1H); **<sup>13</sup>C NMR** (101 MHz,  $\text{DMSO}-d_6$ )  $\delta$  188.0, 173.8, 167.5, 140.6, 137.7, 135.7, 135.2, 133.6, 132.1, 129.7, 129.3, 128.8, 128.1, 127.8, 82.6, 52.4, 48.1; **IR** (neat): 3327, 2923, 1786, 1660, 1409, 700, 503  $\text{cm}^{-1}$ ; **HRMS** (ESI):  $m/z$  for  $[\text{M}+\text{H}]^+$ : calcd 392.0951, found 392.0948; **HPLC**: Daicel Chiralpak IB,  $n$ -hexane/ $i$ -PrOH = 80/20, flow rate = 1 mL/min,  $\lambda = 254$  nm,  $t_{\text{major}} = 13.69$  min and  $t_{\text{minor}} = 28.28$  min.

***N*-((3R,3'S,4'R)-4,5'-dioxo-3'-phenyl-4',5'-dihydro-3'H-spiro[chromane-3,2'-furan]-4'-yl)benzamide (3ga)**

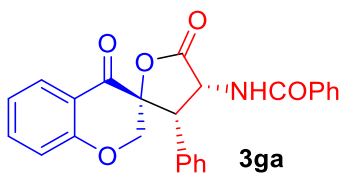

Yellow solid in 88% isolated yield (109mg, 7:1 dr);  $[\alpha]_{\text{D}}^{20} = +156$  ( $c = 1.0$ ,  $\text{CH}_2\text{Cl}_2$ , 92% ee); **m.p.** = 178.6-179.9 °C; **<sup>1</sup>H NMR** (400 MHz,  $\text{CDCl}_3$ )  $\delta$  8.02 (d,  $J = 7.6$  Hz, 1H), 7.65-7.50 (m, 1H), 7.46-7.26 (m, 8H), 7.22-7.07 (m, 3H), 6.96 (d,  $J = 8.3$  Hz, 1H), 6.40 (d,  $J = 5.5$  Hz, 1H), 5.66-5.53 (m, 1H), 4.46 (d,  $J = 11.9$  Hz, 1H), 4.35 (d,  $J = 8.2$  Hz, 1H), 4.25 (d,  $J = 11.9$  Hz, 1H); **<sup>13</sup>C NMR** (101 MHz,  $\text{CDCl}_3$ )  $\delta$  188.6, 174.2, 167.3, 161.3, 137.3, 133.1, 132.2, 131.9, 129.3, 128.9, 128.5, 126.9, 122.7, 118.1, 117.9, 82.0, 69.0, 52.2, 49.6; **IR** (neat): 3360, 2917, 1800, 1467, 1154, 1020, 717, 501  $\text{cm}^{-1}$ ; **HRMS** (ESI):  $m/z$  for  $[\text{M}+\text{H}]^+$ : calcd 414.1336, found 414.1334; **HPLC**: Daicel Chiralpak IB,  $n$ -hexane/ $i$ -PrOH = 80/20, flow rate = 1 mL/min,  $\lambda = 254$  nm,  $t_{\text{major}} = 11.05$  min and  $t_{\text{minor}} = 9.35$  min.

***N*-((3R,3'S,4'R)-6-methyl-4,5'-dioxo-3'-phenyl-4',5'-dihydro-3'H-spiro[chromane-3,2'-furan]-4'-yl)benzamide (3ha)**

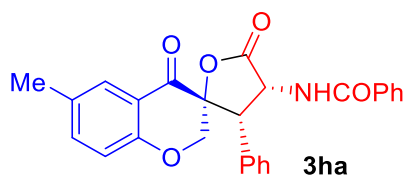

Yellow solid in 70% isolated yield (90mg, 10:1 dr);  $[\alpha]_D^{20} = +171$  (c = 1.0, CH<sub>2</sub>Cl<sub>2</sub>, 96% ee); **m.p.** = 168.6-169.9 °C; **<sup>1</sup>H NMR** (400 MHz, CDCl<sub>3</sub>) δ 7.81 (d, *J* = 1.1 Hz, 1H), 7.44-7.34 (m, 7H), 7.32-7.26 (m, 2H), 7.16-7.09 (m, 2H), 6.86 (d, *J* = 8.5 Hz, 1H), 6.32 (d, *J* = 5.7 Hz, 1H), 5.65-5.55 (m, 1H), 4.43 (d, *J* = 11.9 Hz, 1H), 4.33 (d, *J* = 8.3 Hz, 1H), 4.22 (d, *J* = 11.9 Hz, 1H), 2.37 (s, 3H); **<sup>13</sup>C NMR** (101MHz, CDCl<sub>3</sub>) δ 188.7, 174.2, 167.3, 159.3, 138.5, 133.1, 132.3, 131.9, 129.3, 128.8, 128.5, 128.0, 126.8, 117.7, 82.0, 69.0, 52.1, 49.6, 20.5; **IR** (neat): 3311, 2921, 1798, 1663, 1489, 1156, 696, 504 cm<sup>-1</sup>; **HRMS** (ESI): *m/z* for [M+H]<sup>+</sup>: calcd 428.1492, found 428.1490; **HPLC**: Daicel Chiralpak IB, *n*-hexane/*i*-PrOH = 80/20, flow rate = 1 mL/min, λ = 254 nm, *t*<sub>major</sub> = 12.56 min and *t*<sub>minor</sub> = 25.39 min. ***N*-((3*R*,3'*S*,4'*R*)-7-fluoro-4,5'-dioxo-3'-phenyl-4',5'-dihydro-3'*H*-spiro[chromane-3,2'-furan]-4-yl)benzamide (3ia)**

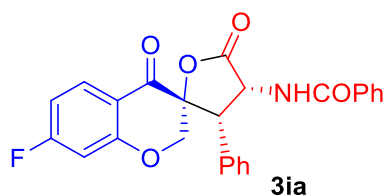

Yellow solid in 75% isolated yield (97mg, 9:1 dr);  $[\alpha]_D^{20} = +80$  (c = 1.0, CH<sub>2</sub>Cl<sub>2</sub>, 97% ee); **m.p.** = 182.6-183.2 °C; **<sup>1</sup>H NMR** (400 MHz, CDCl<sub>3</sub>) δ 8.12-8.00 (m, 1H), 7.42-7.32 (m, 6H), 7.32-7.24 (m, 2H), 7.21-7.07 (m, 2H), 6.96-6.84 (m, 1H), 6.71-6.61 (m, 1H), 6.37 (d, *J* = 6.0 Hz, 1H), 5.68-5.52 (m, 1H), 4.47 (d, *J* = 12.0 Hz, 1H), 4.35 (d, *J* = 8.3 Hz, 1H), 4.26 (d, *J* = 12.0 Hz, 1H); **<sup>13</sup>C NMR** (101 MHz, CDCl<sub>3</sub>) δ 187.2, 174.0, 168.24 (d, *J* = 259.2 Hz), 167.3, 162.88 (d, *J* = 13.8 Hz), 133.1, 132.0, 131.3, 129.4, 129.0, 128.5, 126.8, 115.1, 111.6, 111.4, 105.0, 104.7, 81.6, 69.5, 52.2, 49.5; **<sup>19</sup>F NMR** (376 MHz, CDCl<sub>3</sub>) δ -97.41; **IR** (neat): 3296, 2917, 1792, 1613, 1250, 1071, 698, 496, cm<sup>-1</sup>; **HRMS** (ESI): *m/z* for [M+H]<sup>+</sup>: calcd 432.1242, found 432.1240; **HPLC**: Daicel Chiralpak IB, *n*-hexane/*i*-PrOH = 80/20, flow rate = 1 mL/min, λ = 254 nm, *t*<sub>major</sub> = 16.95 min and *t*<sub>minor</sub> = 28.86 min.

## Gram-scale reaction

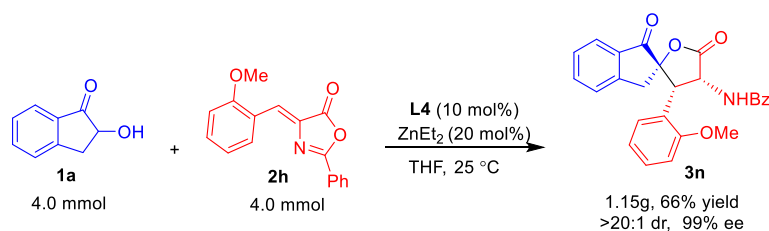

Under a nitrogen atmosphere, a solution of diethylzinc (800 μL, 1.0 M in hexane, 0.8 mmol) was added dropwise to a solution of **L4** (0.4 mmol) in MeCN (10 mL). After the mixture was stirred for 30 min at room temperature, then, α-hydroxy-1-indanone **1a** (4.0 mmol) and isatylydene malononitriles **2h** (4.0 mmol) were added. The reaction mixture was stirred for 24 h at the same temperature. The reaction was quenched with HCl solution (1 M, 2 mL), and the organic layer was extracted with EA (3 × 5 mL). The combined organic layer was washed with brine and dried over Na<sub>2</sub>SO<sub>4</sub>. The solvent was removed under

reduced pressure by using a rotary evaporator. The residue was purified by flash chromatography with petroleum ether/ethyl acetate (4/1) to afford the desired product 1.15g of **3n**.

## References

1. K. Matsuo and M. Shindo, Cu(II)-Catalyzed Acylation by Thiol Esters Under Neutral Conditions: Tandem Acylation-Wittig Reaction Leading to a One-Pot Synthesis of Butenolides, *Org. Lett.*, 2010, **12**, 5346-5349.
2. Z.-F. Zhang, X.-C. Yang, H.-J. Lu and M.-C. Wang, Enantioselective Direct Synthesis of syn- and anti- $\alpha,\beta$ -Dihydroxy  $\gamma$ -Keto Esters Using a Dinuclear Zinc–AzePhenol Complex, *Eur. J. Org. Chem.*, 2018, **2018**, 785-793.
3. R. Mato, R. Manzano, E. Reyes, L. Carrillo, U. Uria and J. L. Vicario, Catalytic Enantioselective Transannular Morita–Baylis–Hillman Reaction, *J. Am. Chem. Soc.*, 2019, **141**, 9495-9499.
4. Q. An, J. Shen, D. Liu, Y. Liu and W. Zhang, Construction of Chiral-Fused Tricyclic  $\gamma$ -Lactams via a trans-Perhydroindolic Acid-Catalyzed Asymmetric Domino Reaction, *Org. Lett.*, 2017, **19**, 2925-2928.

# NMR Spectra of compounds

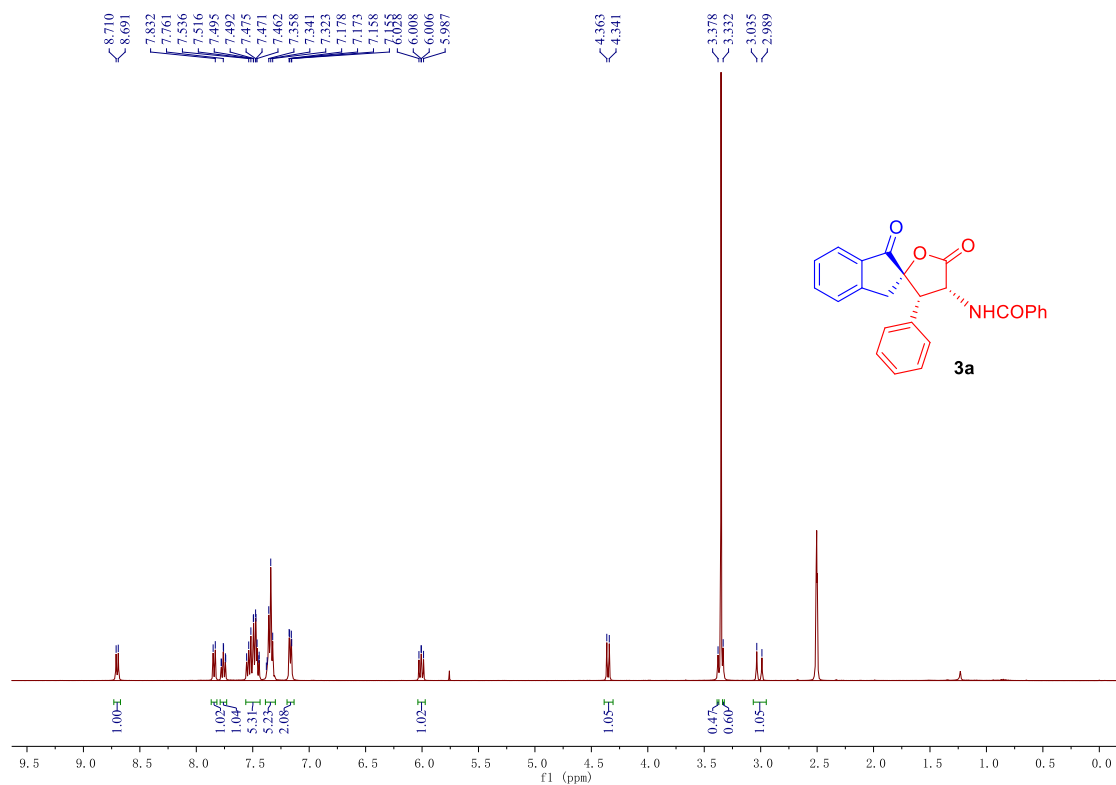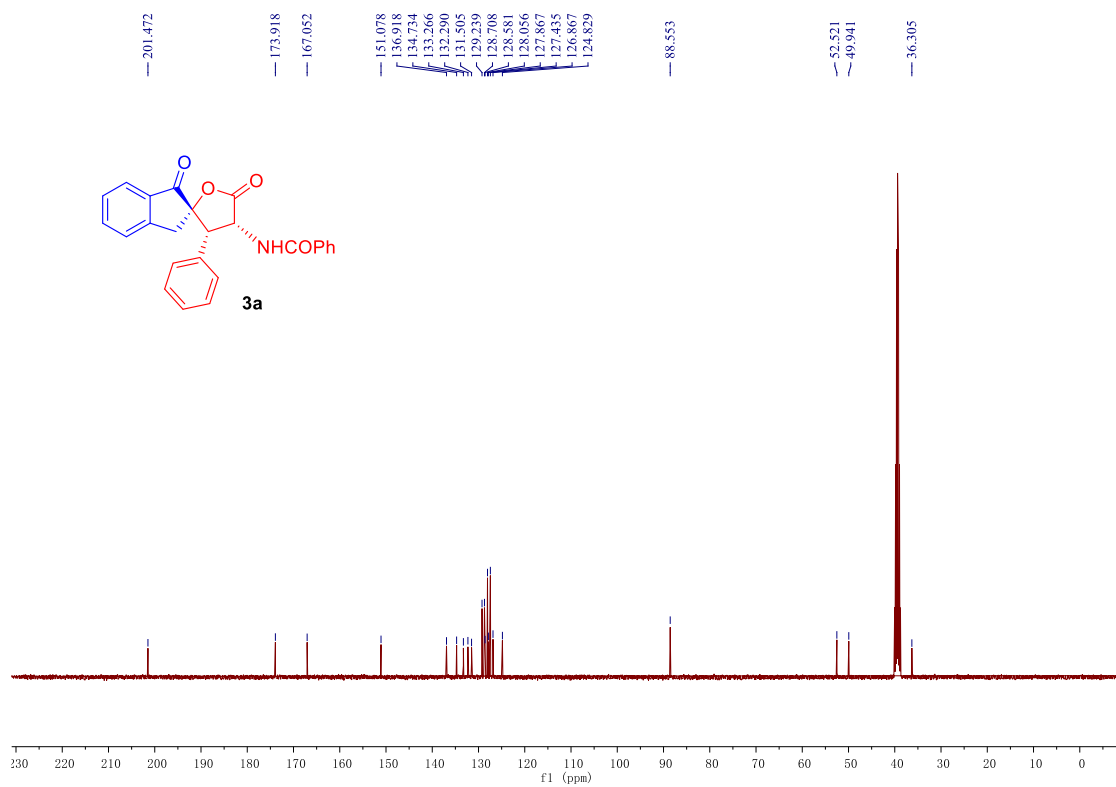



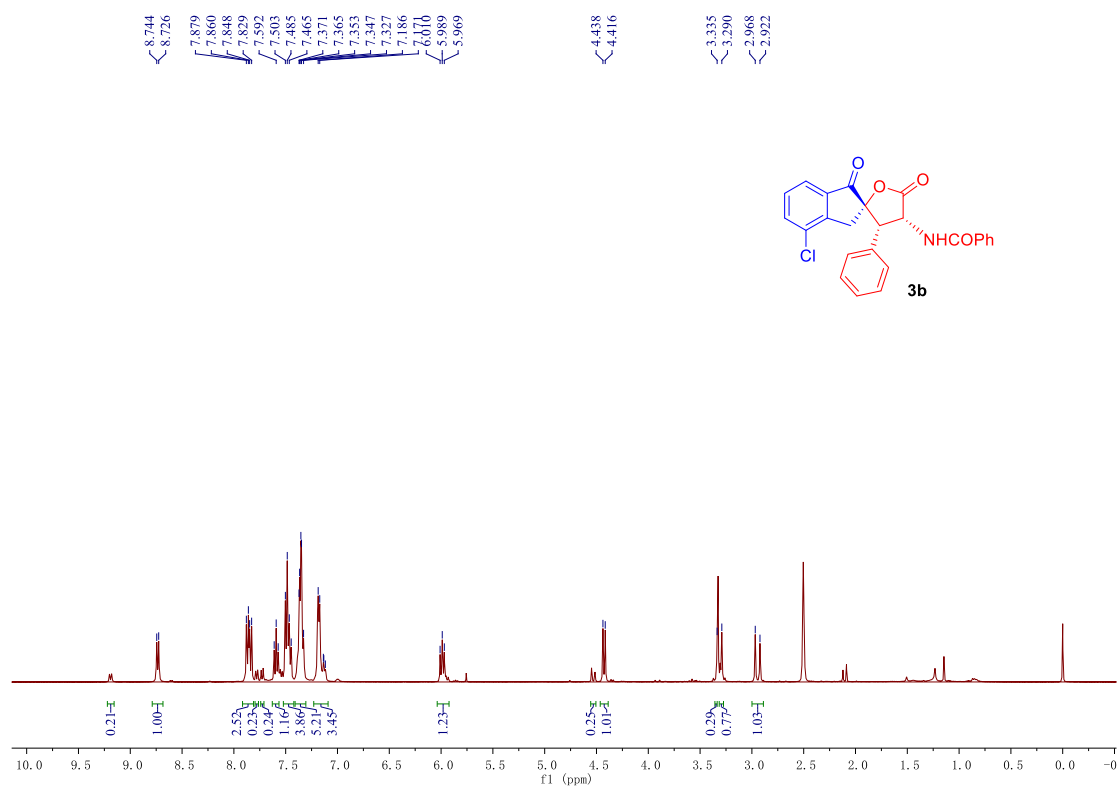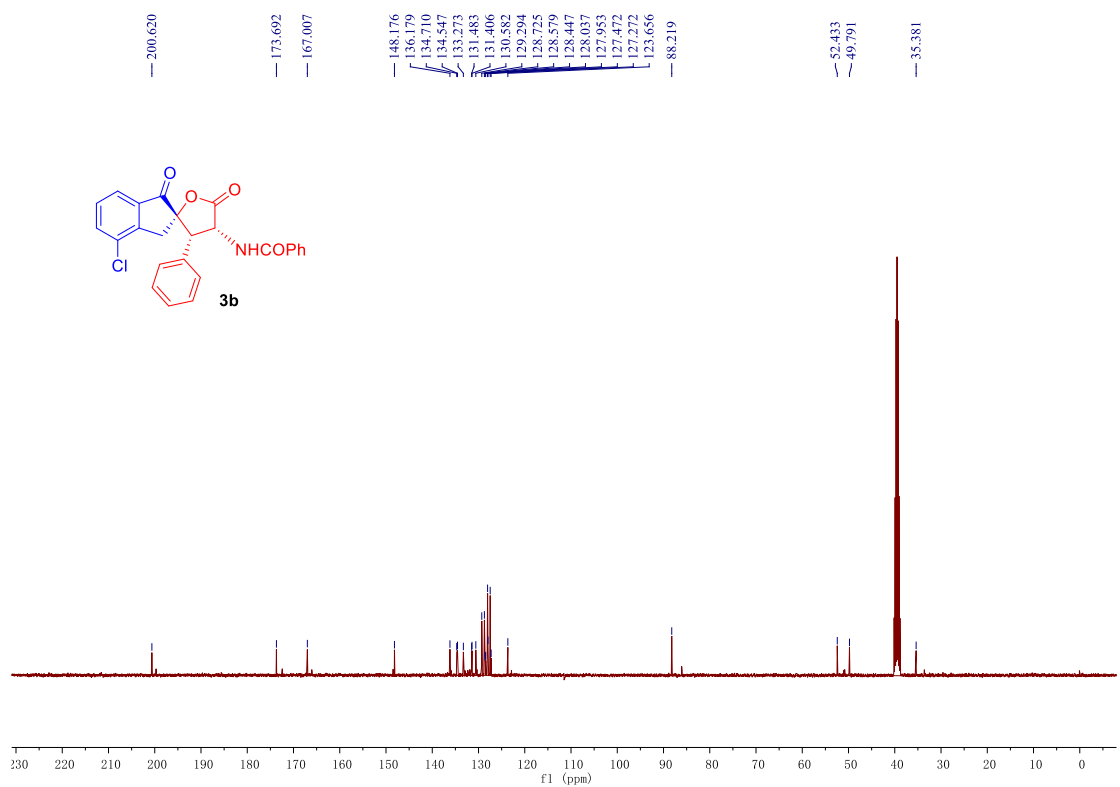

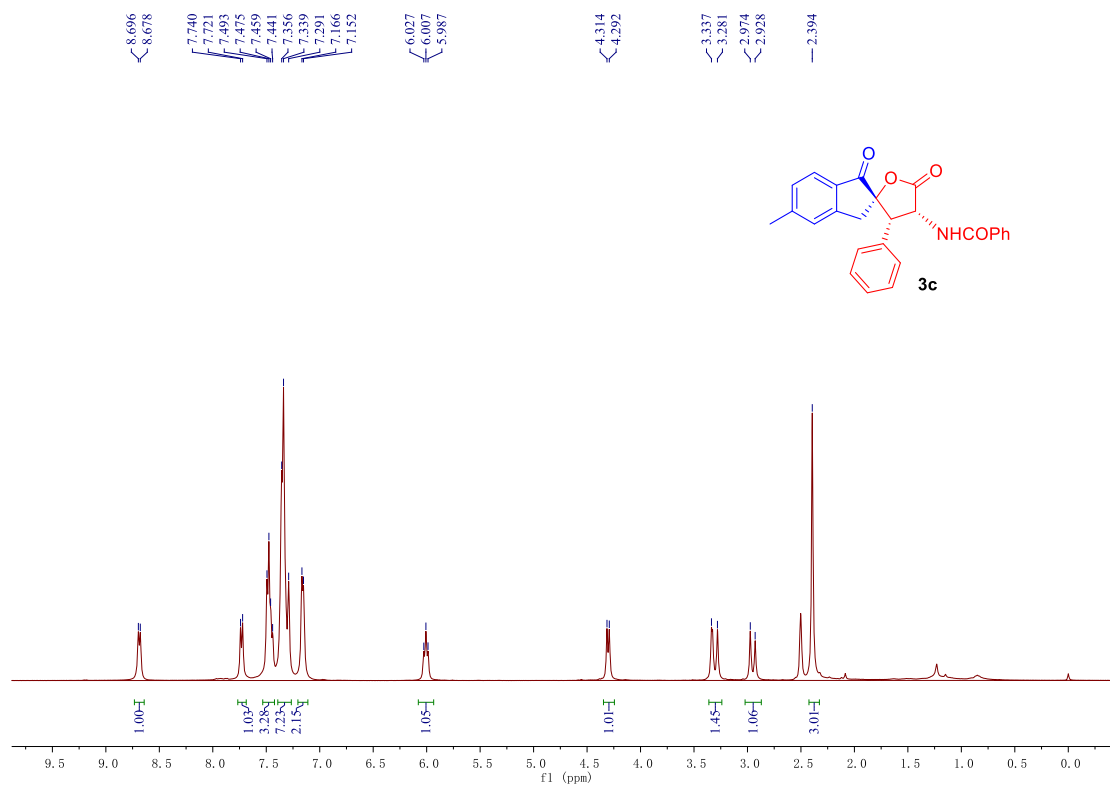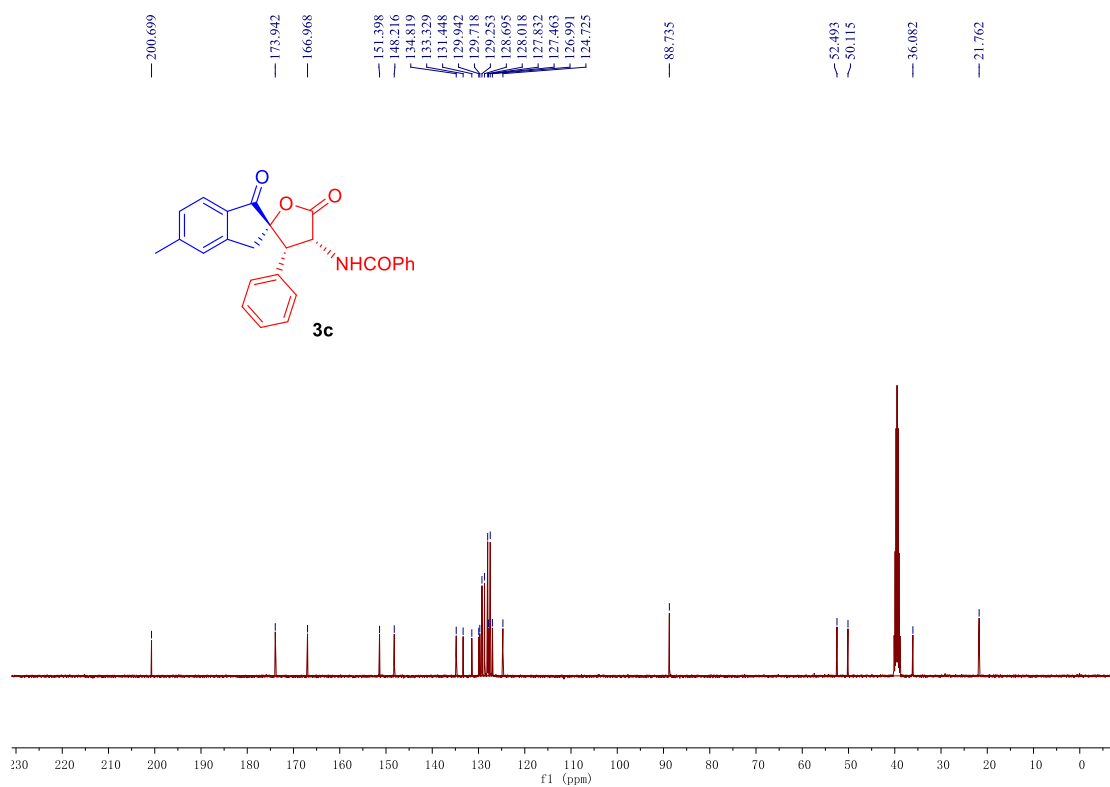

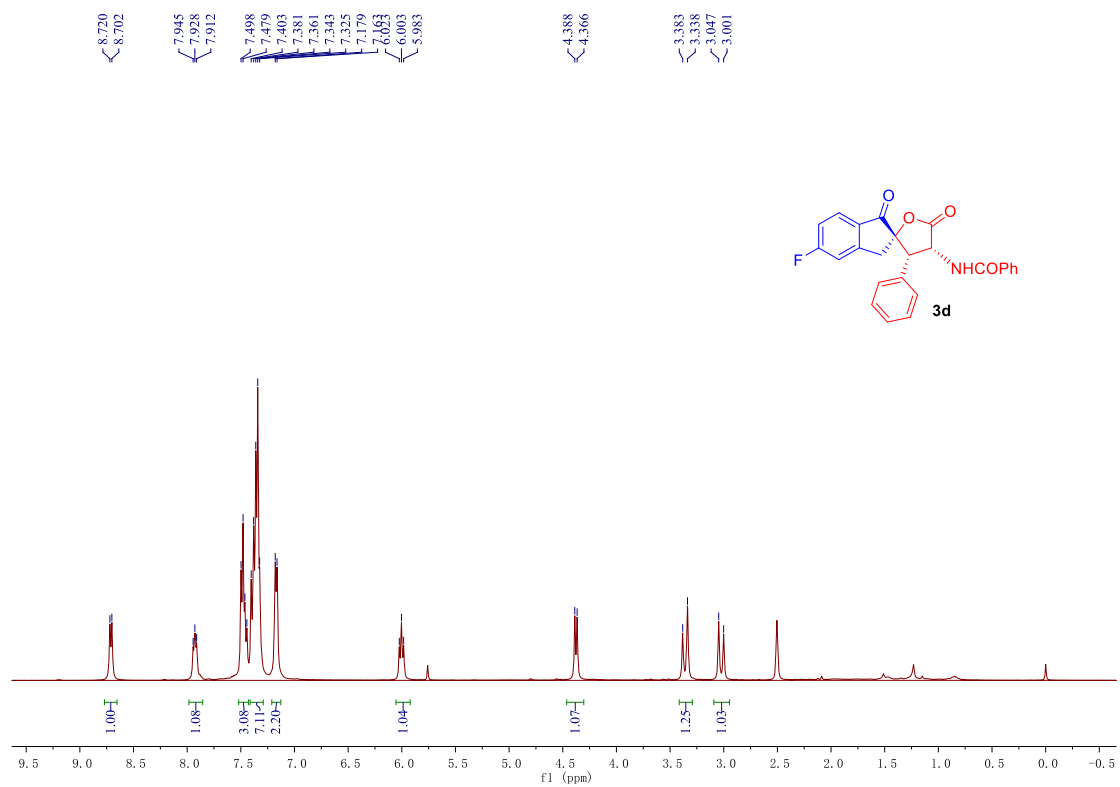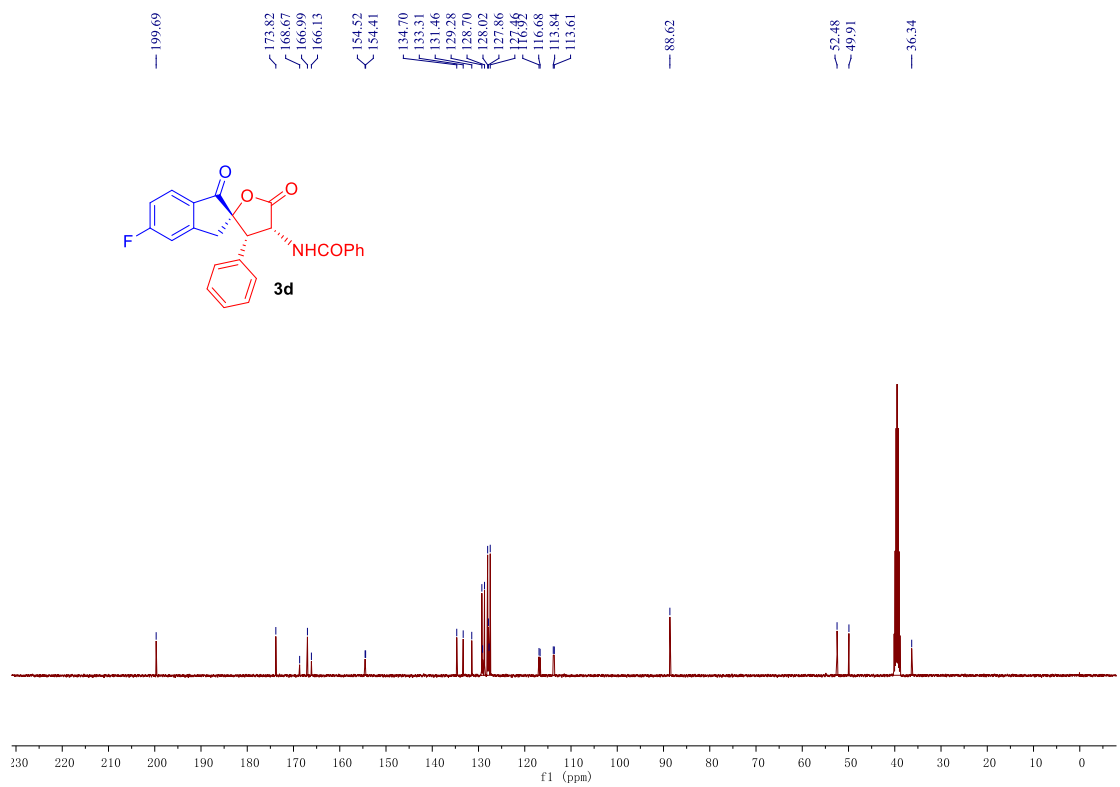

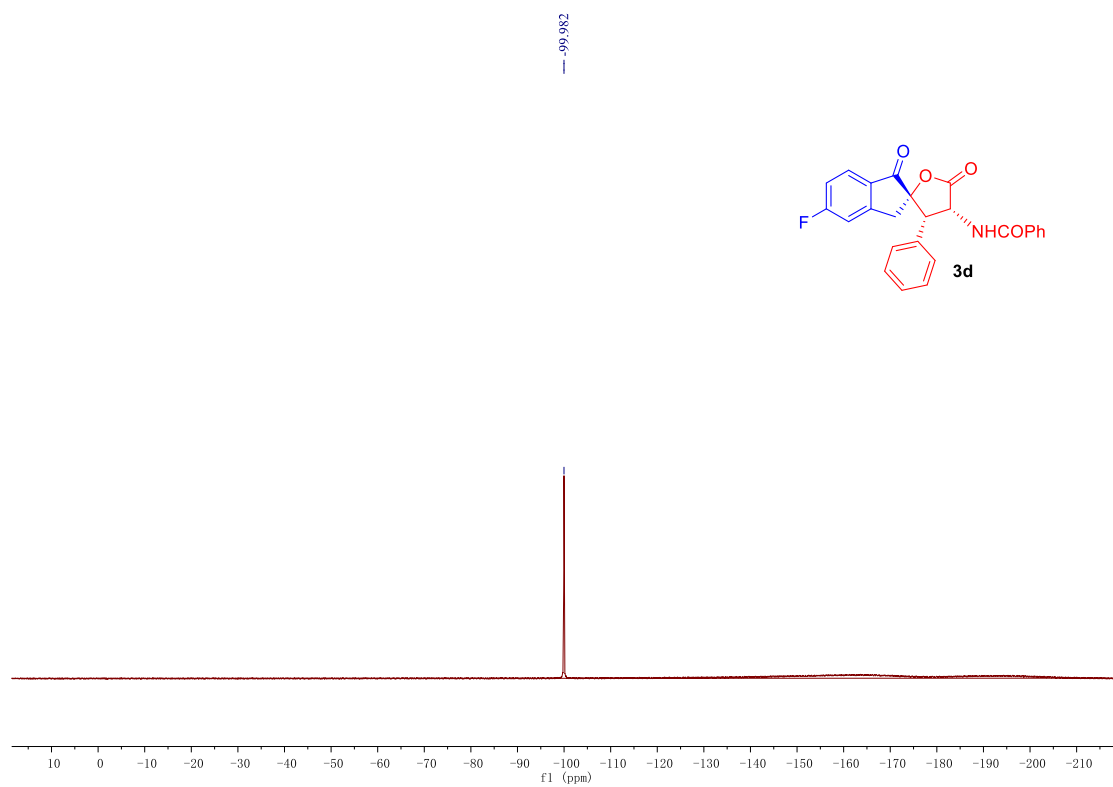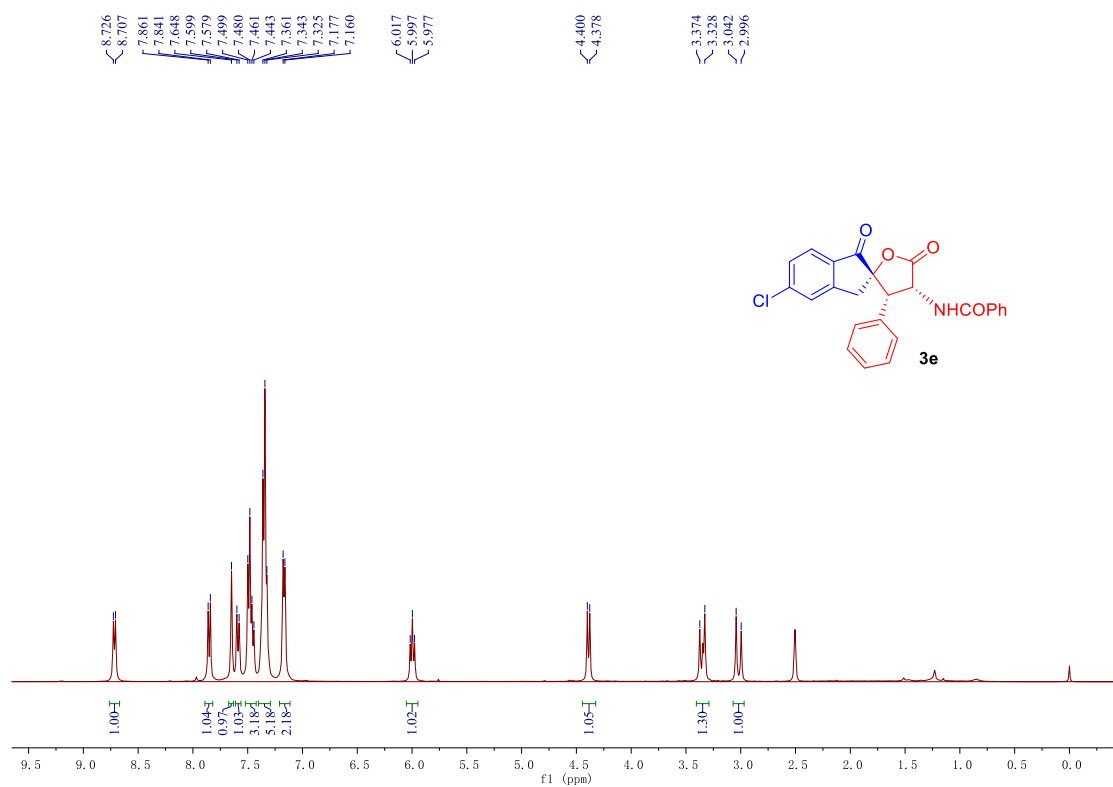

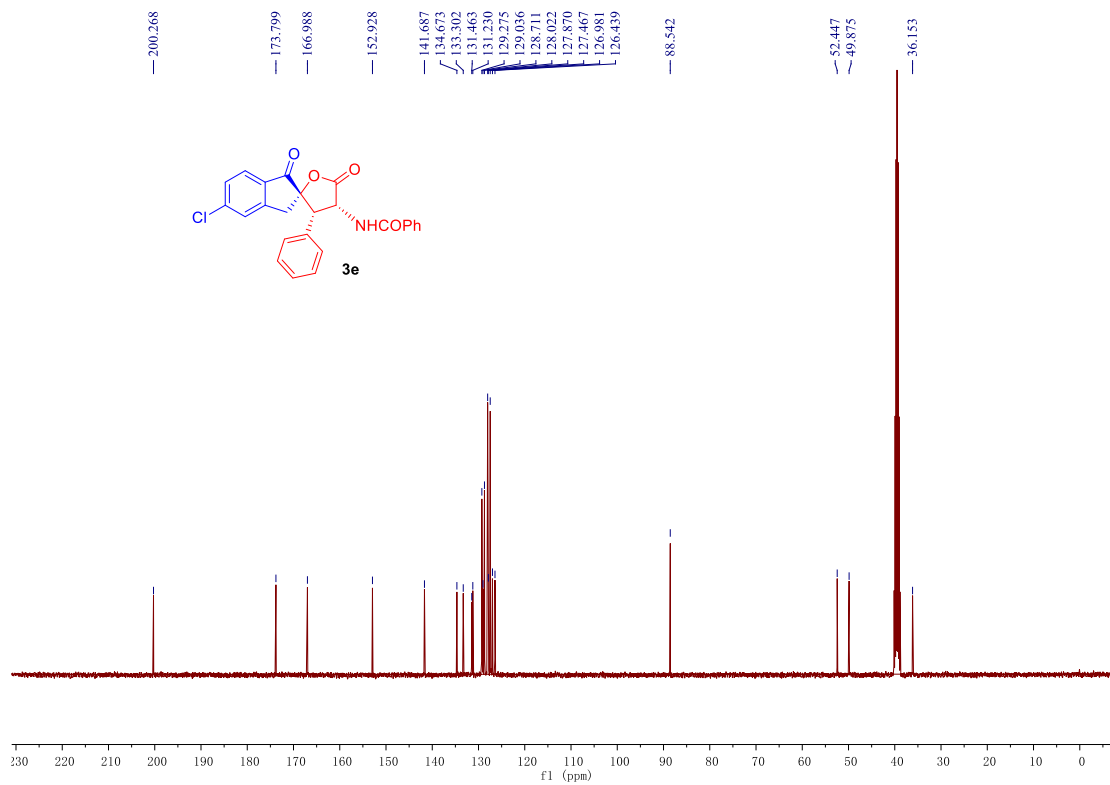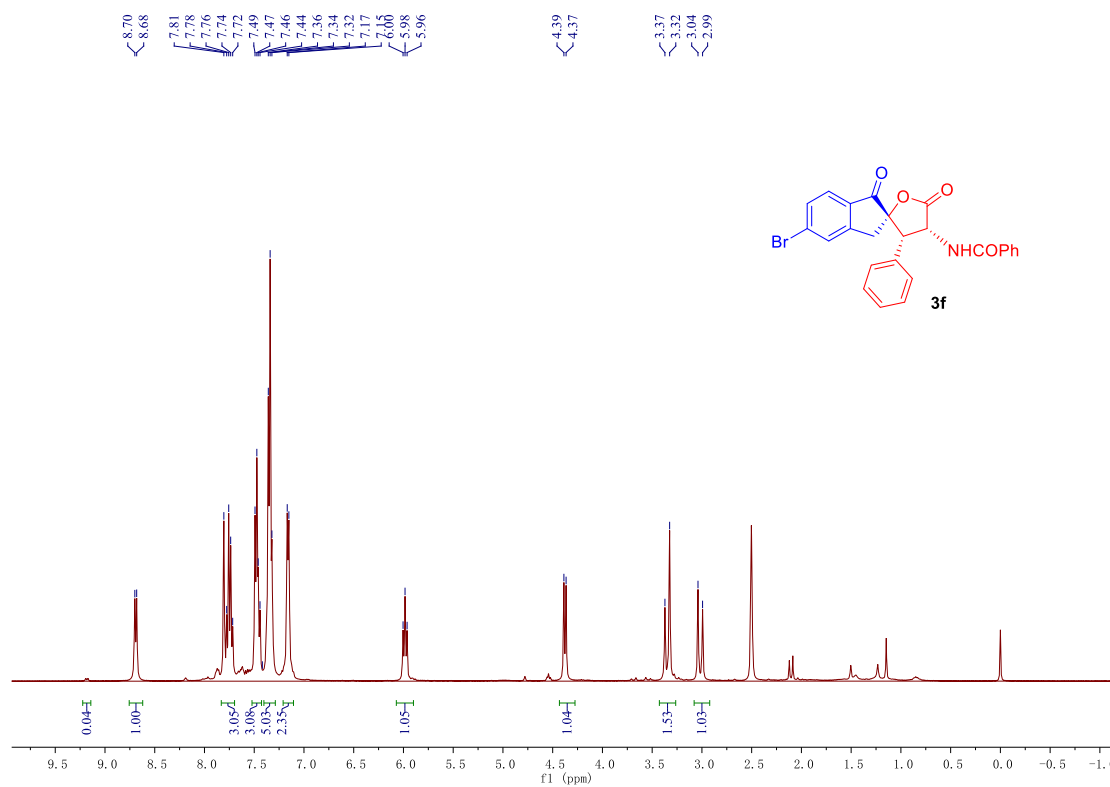

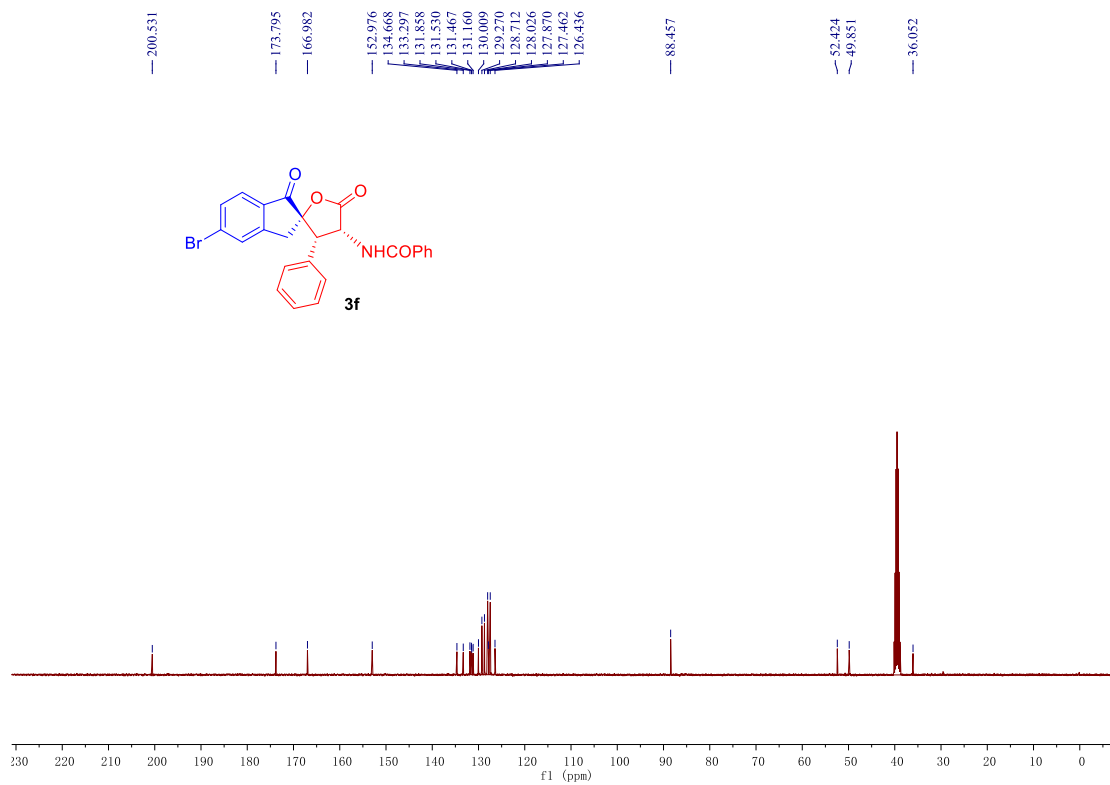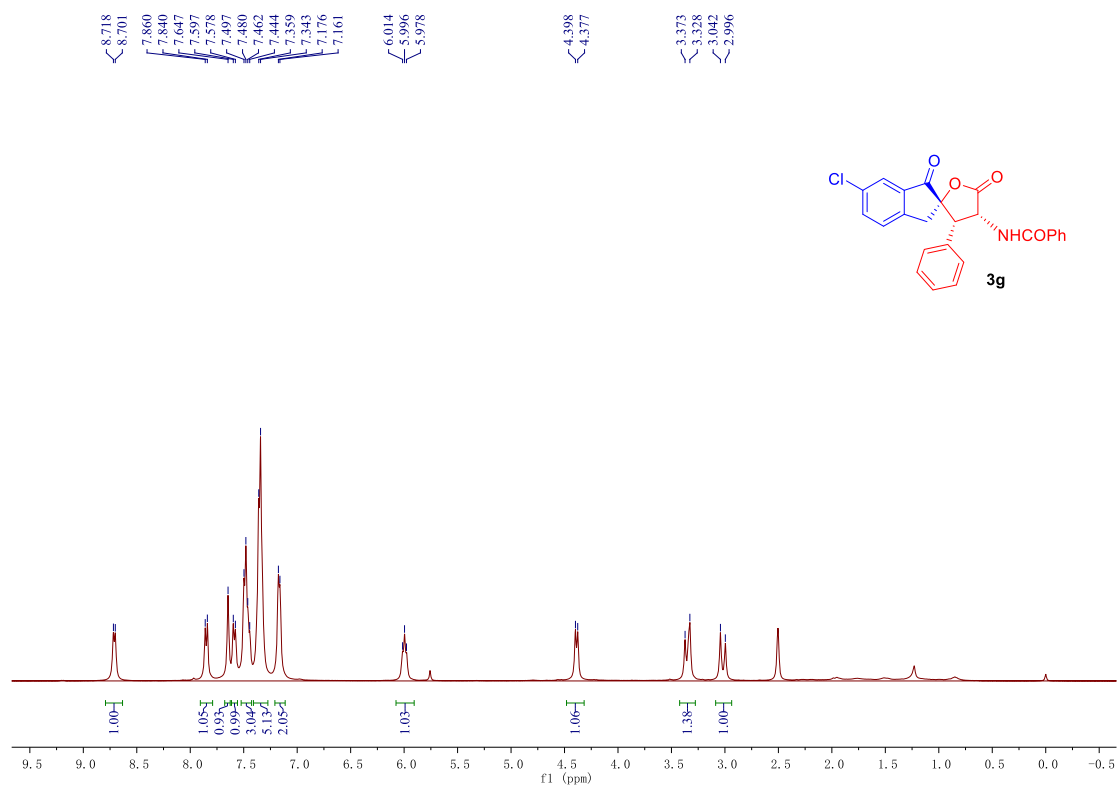

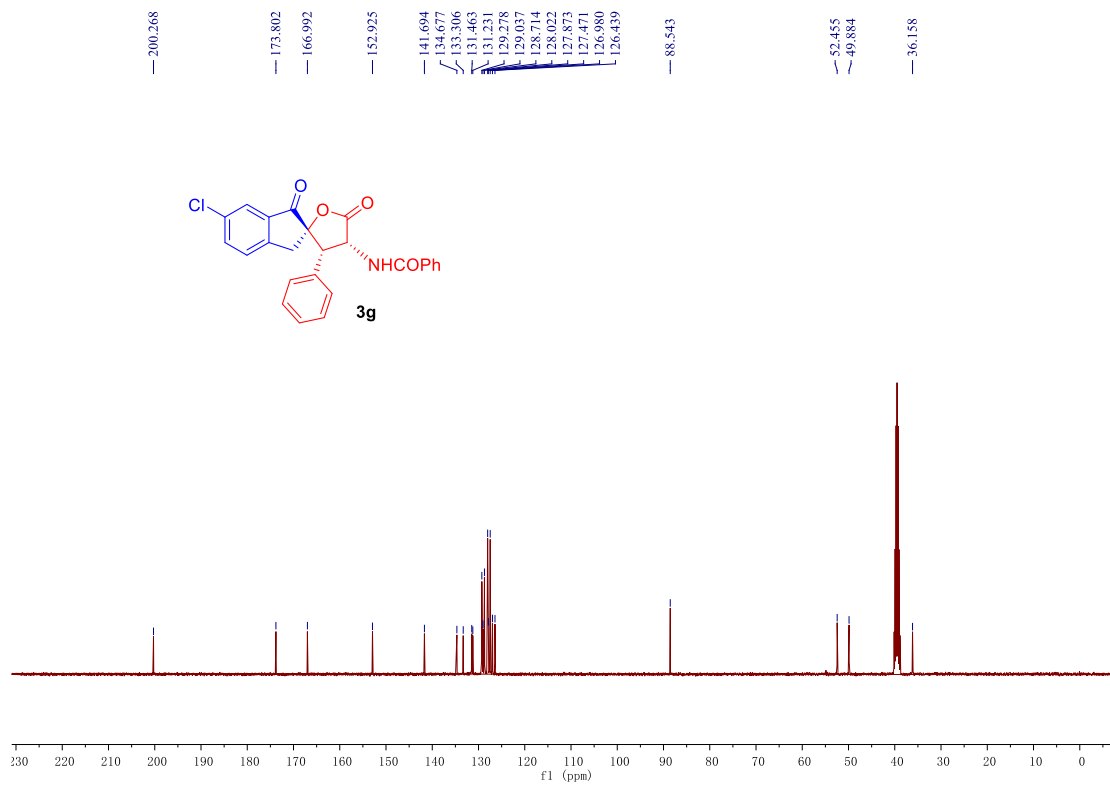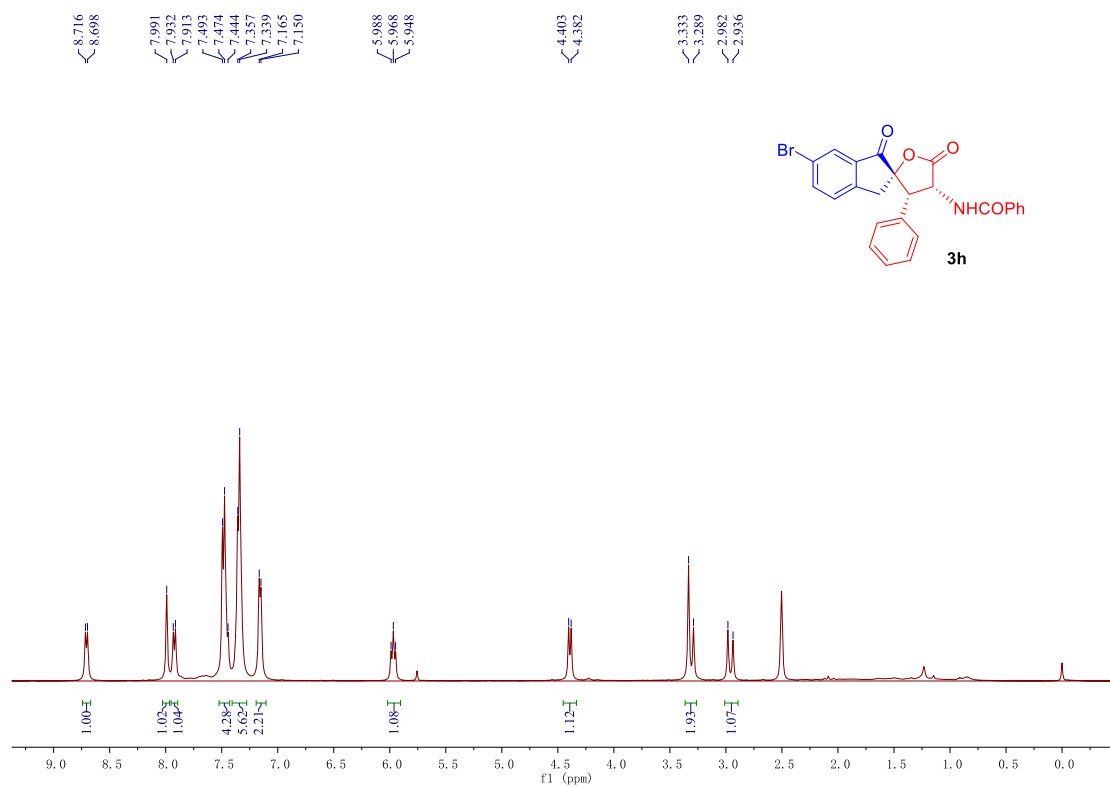

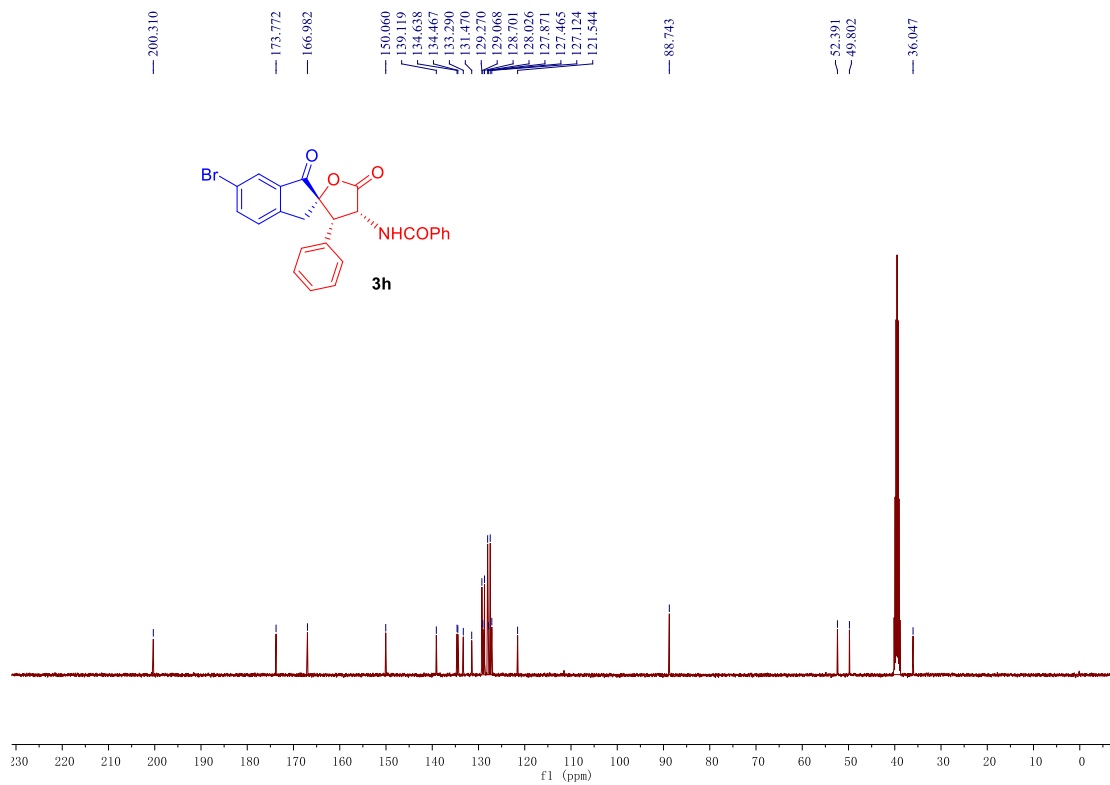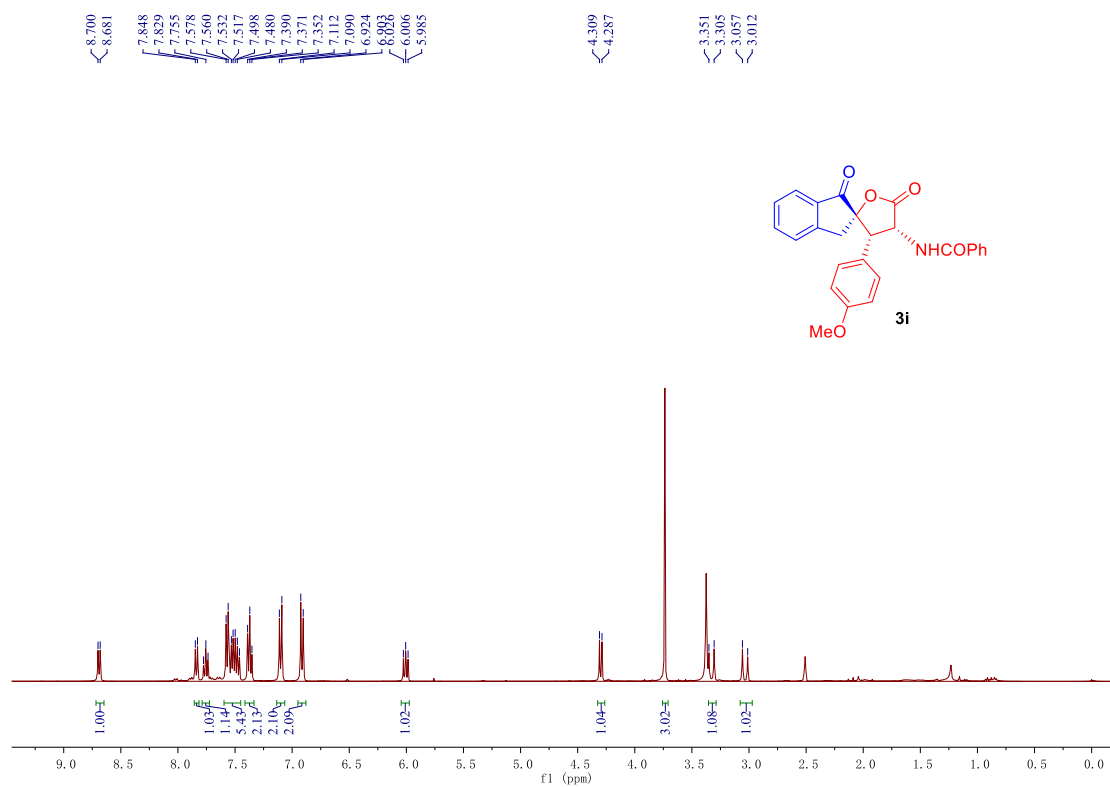



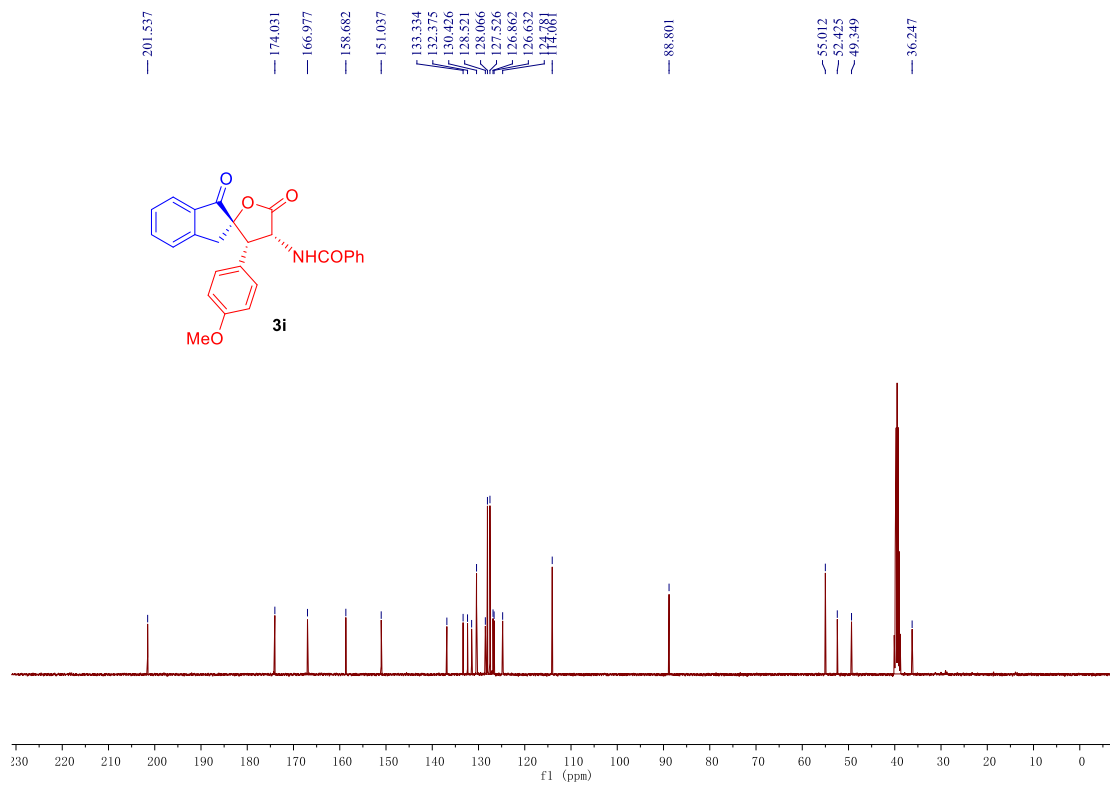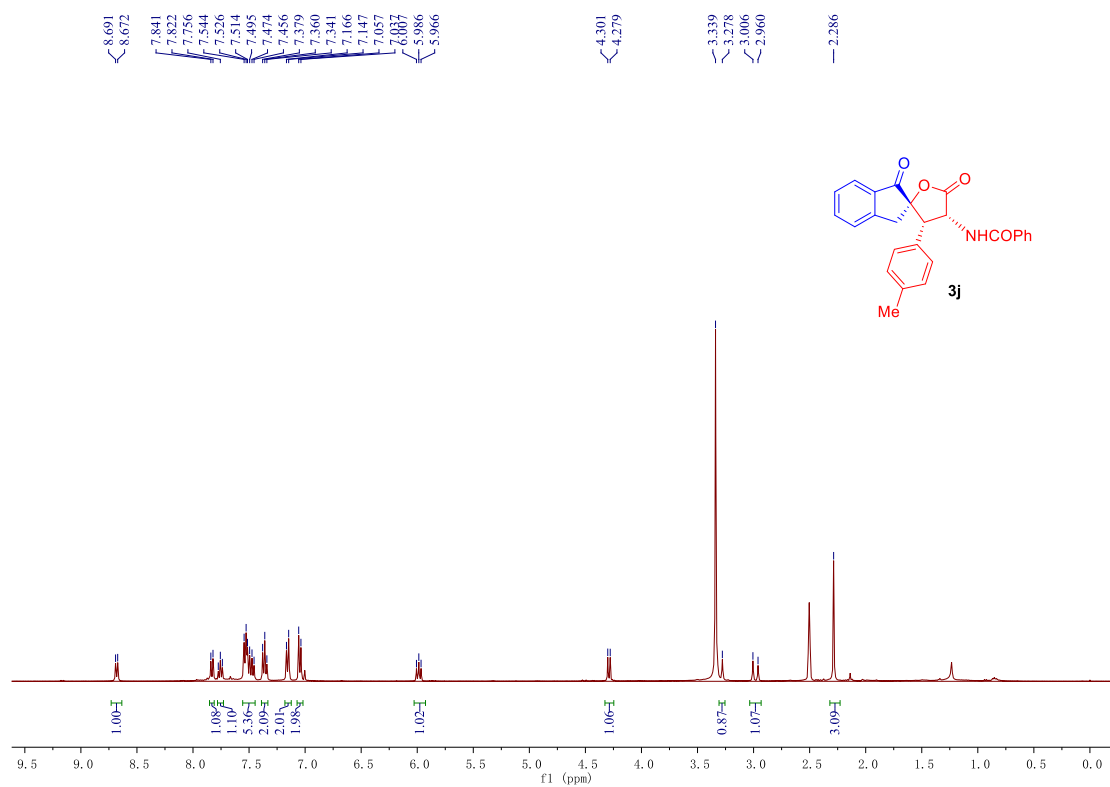

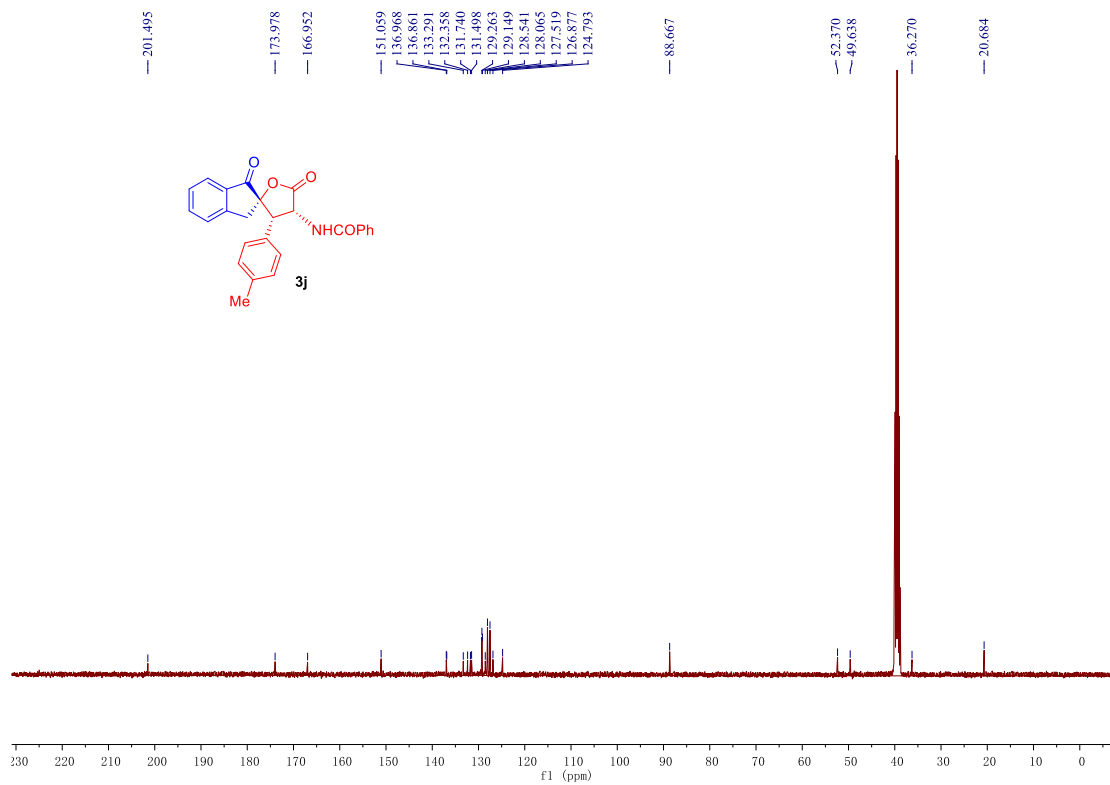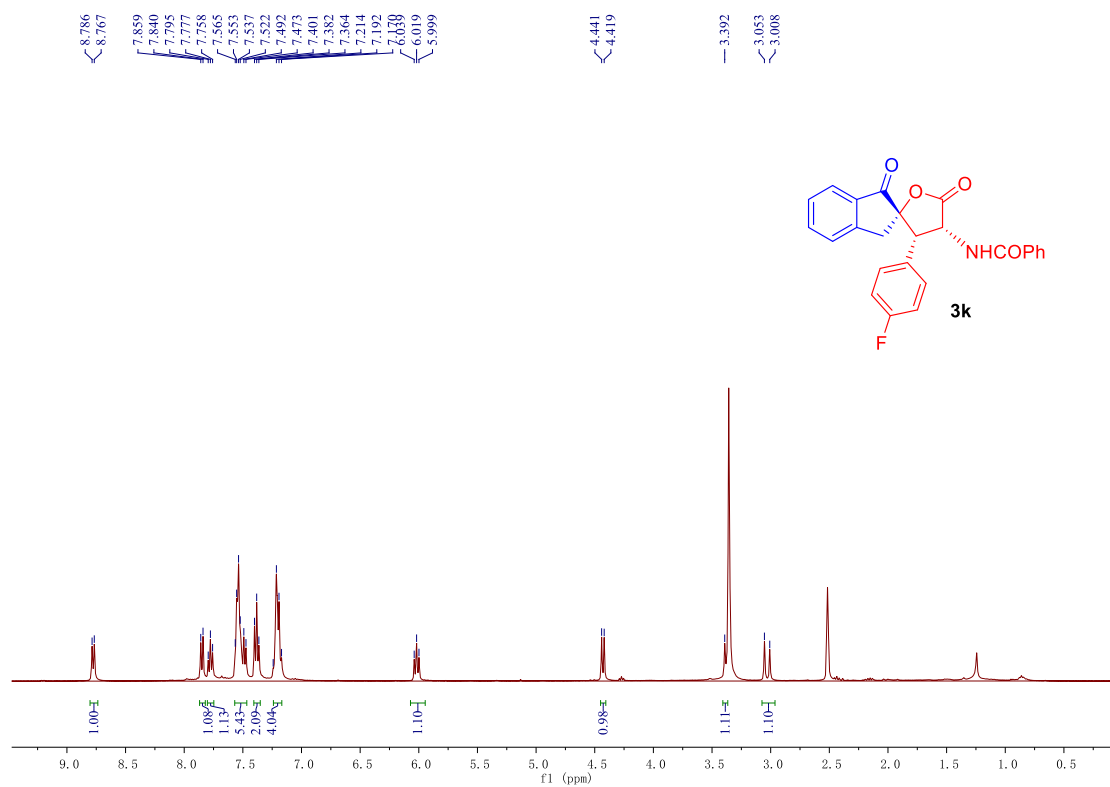

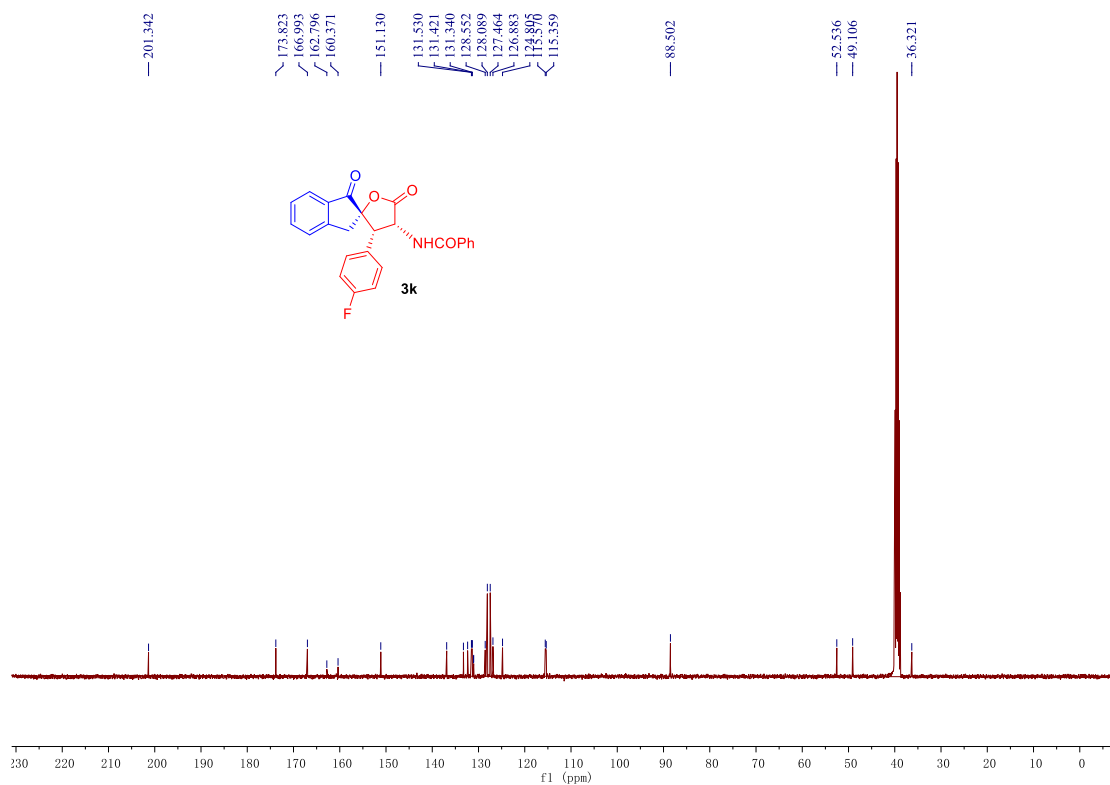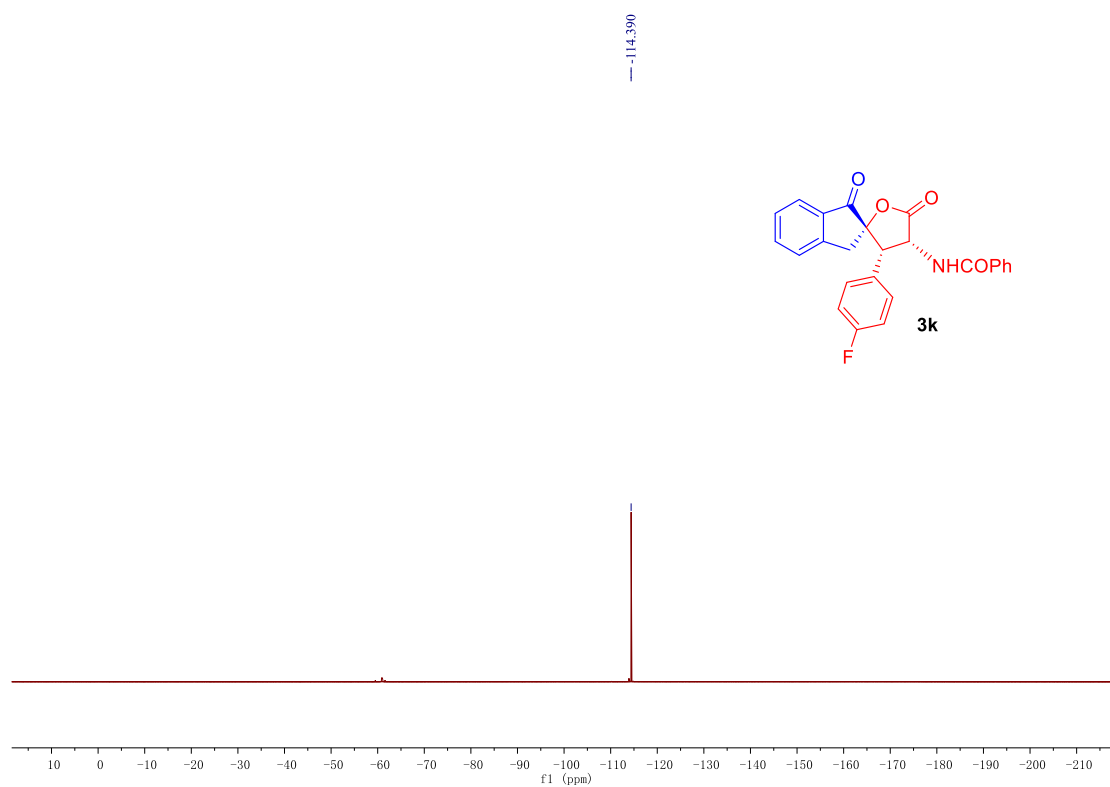

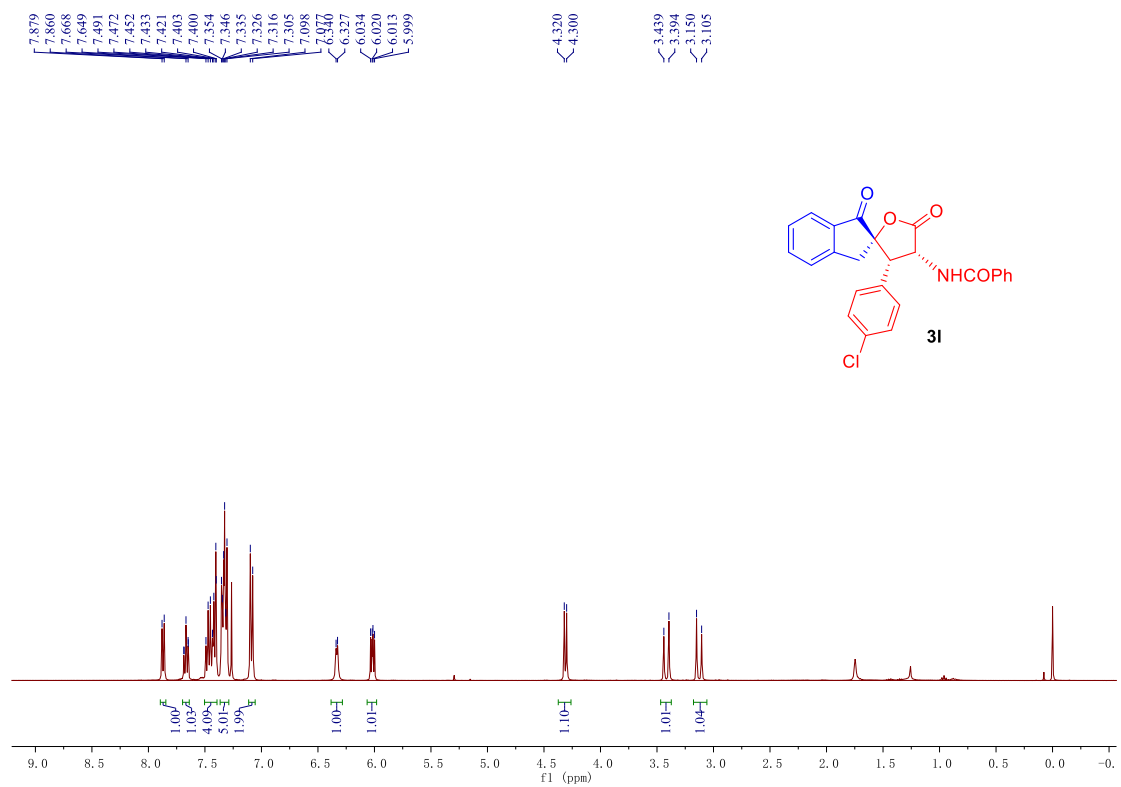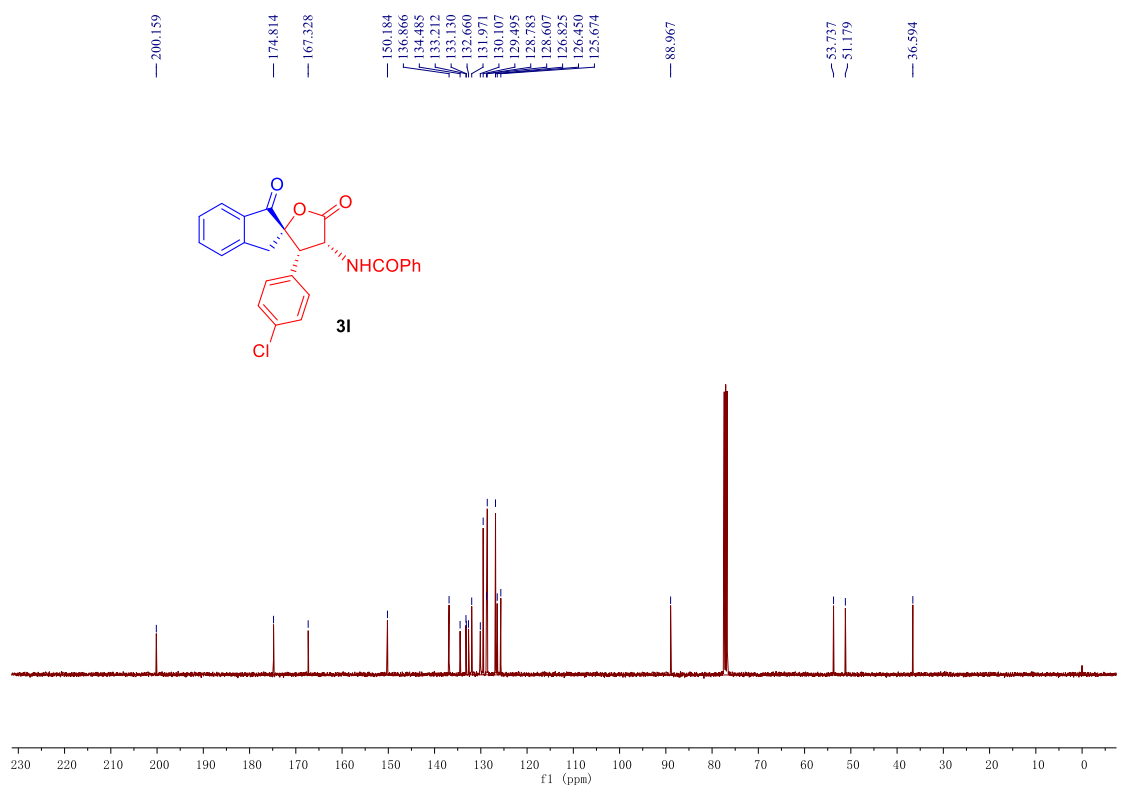

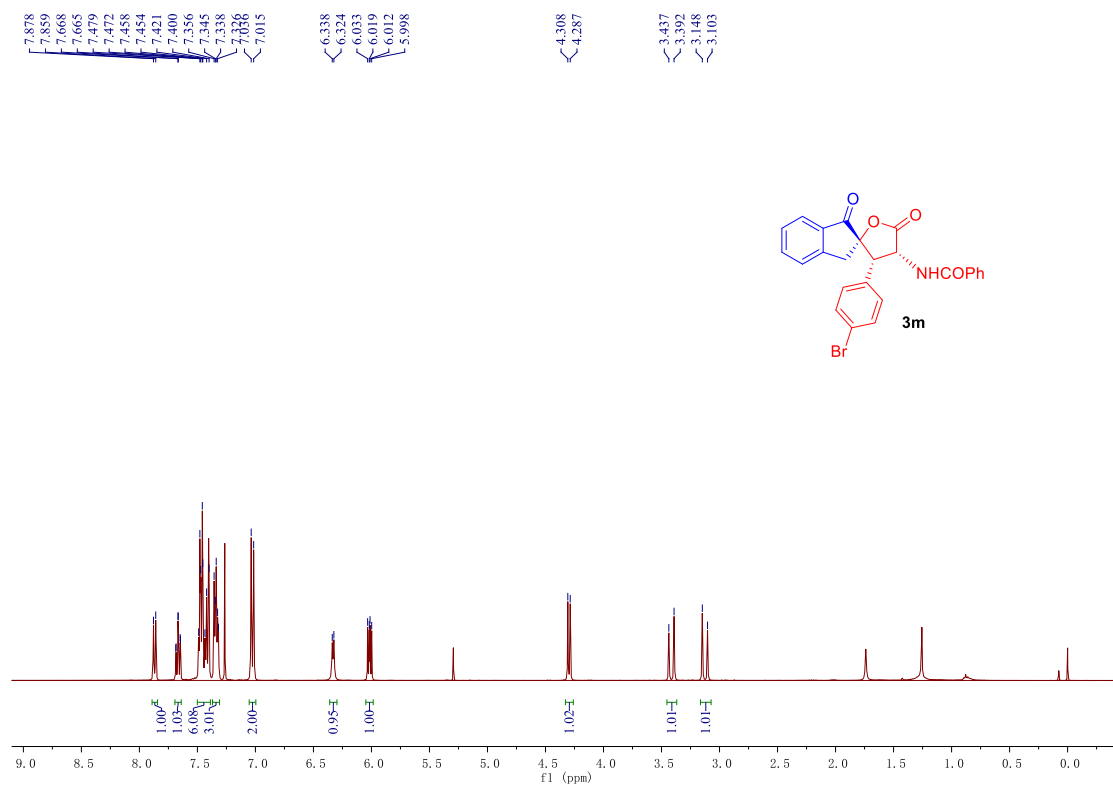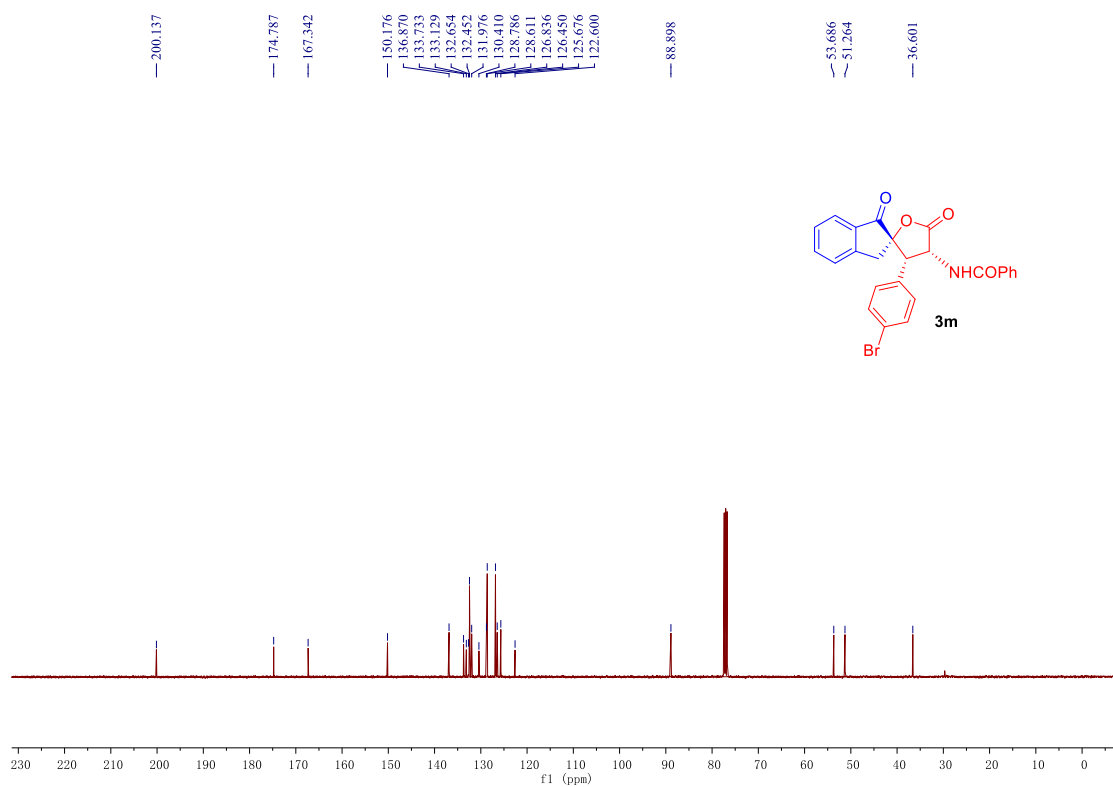

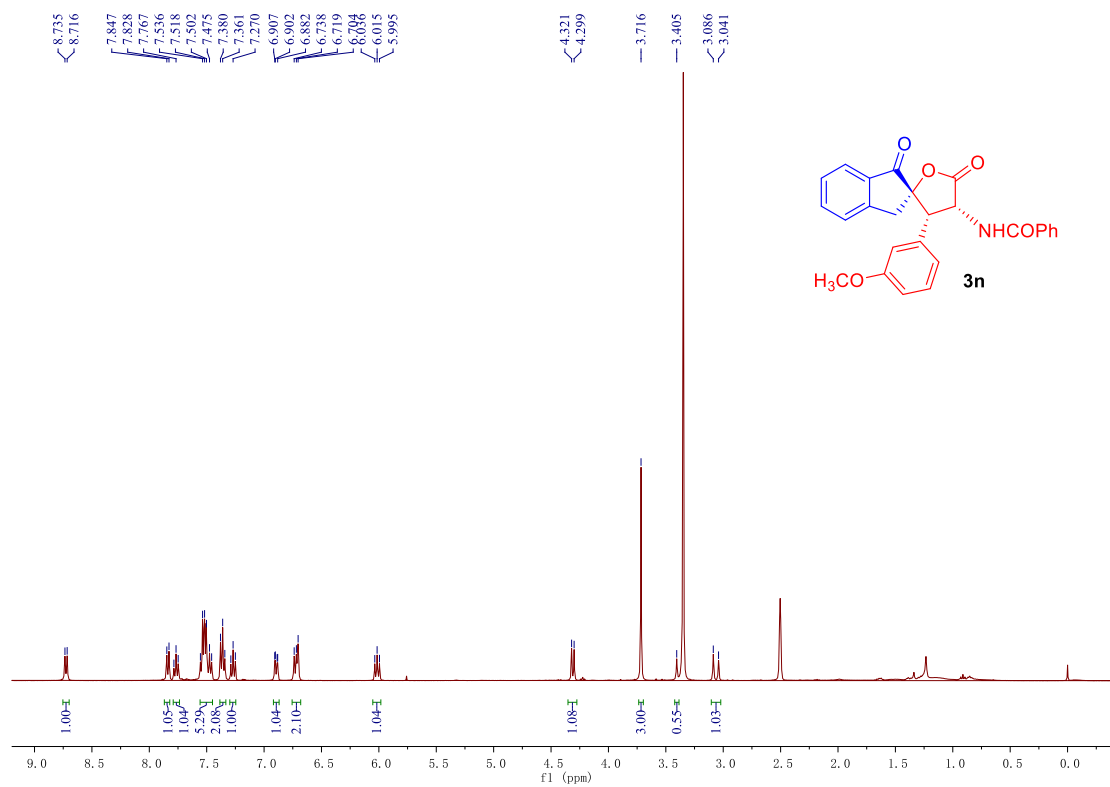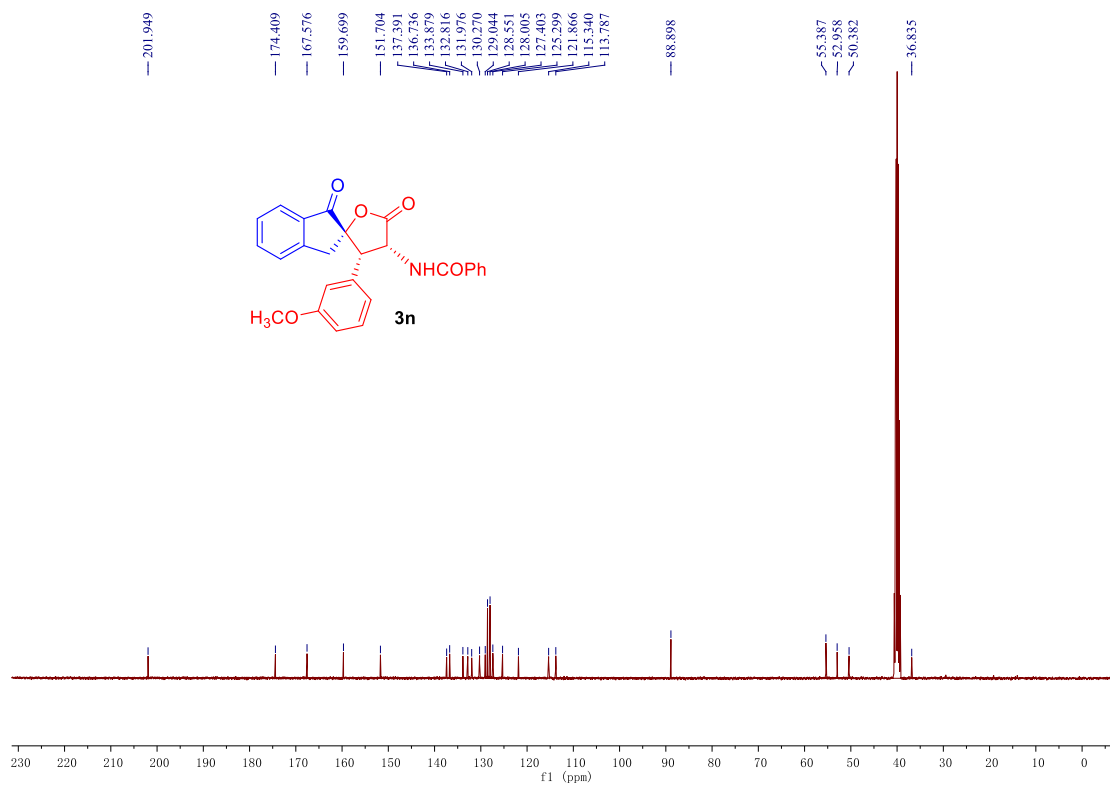

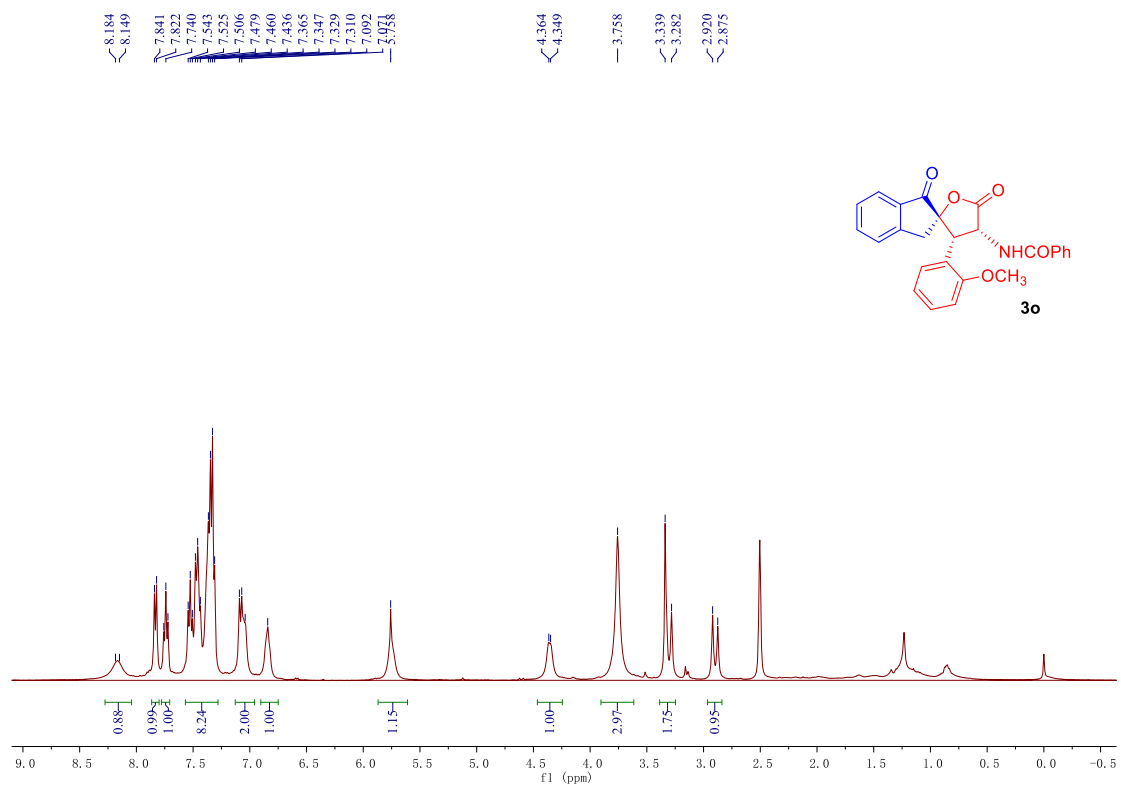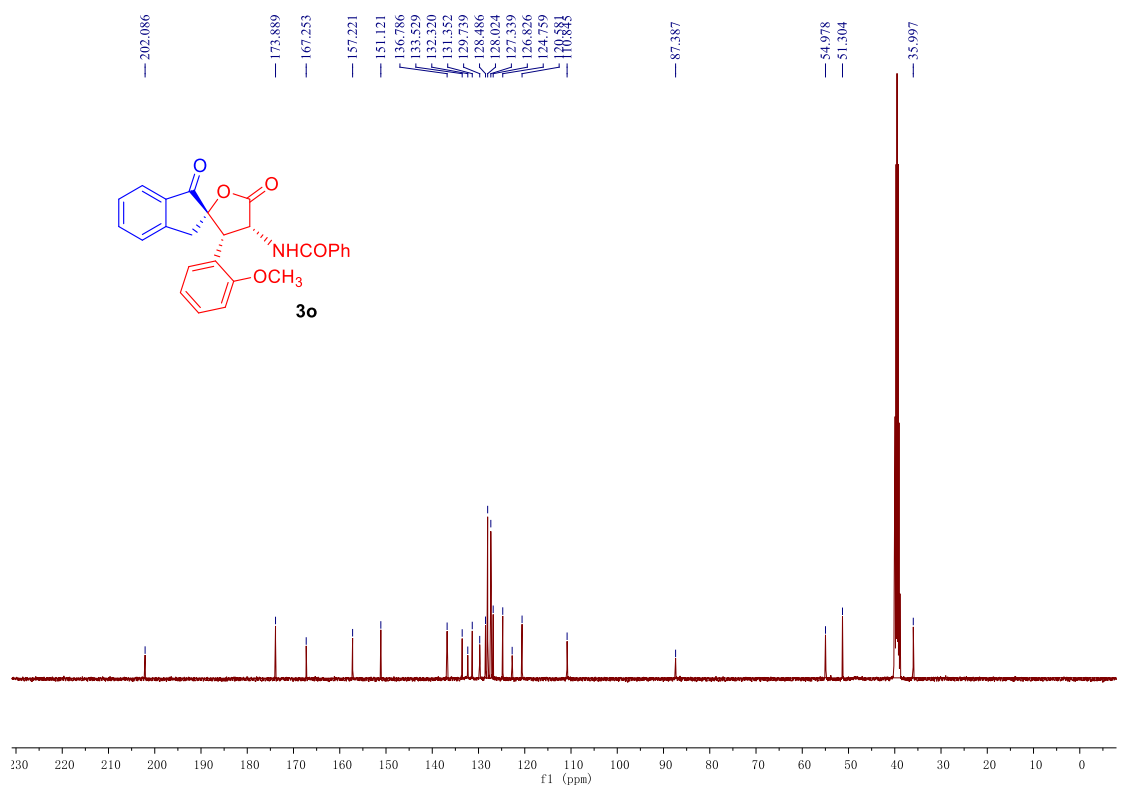

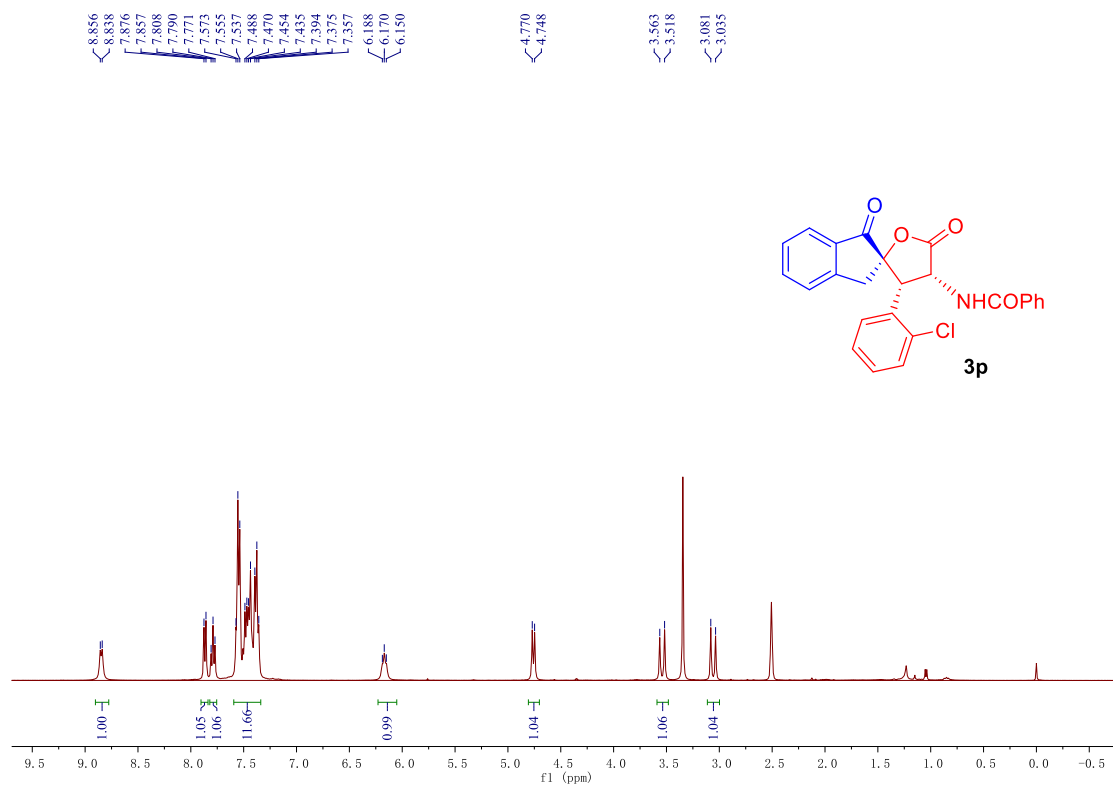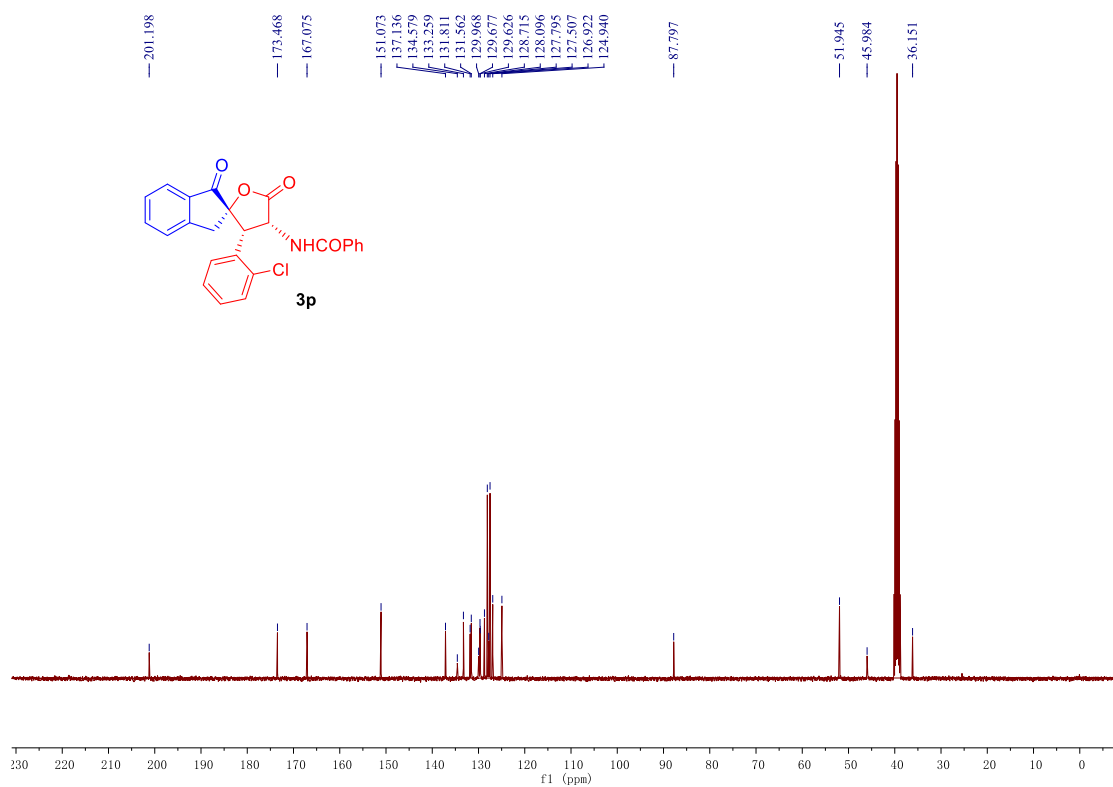



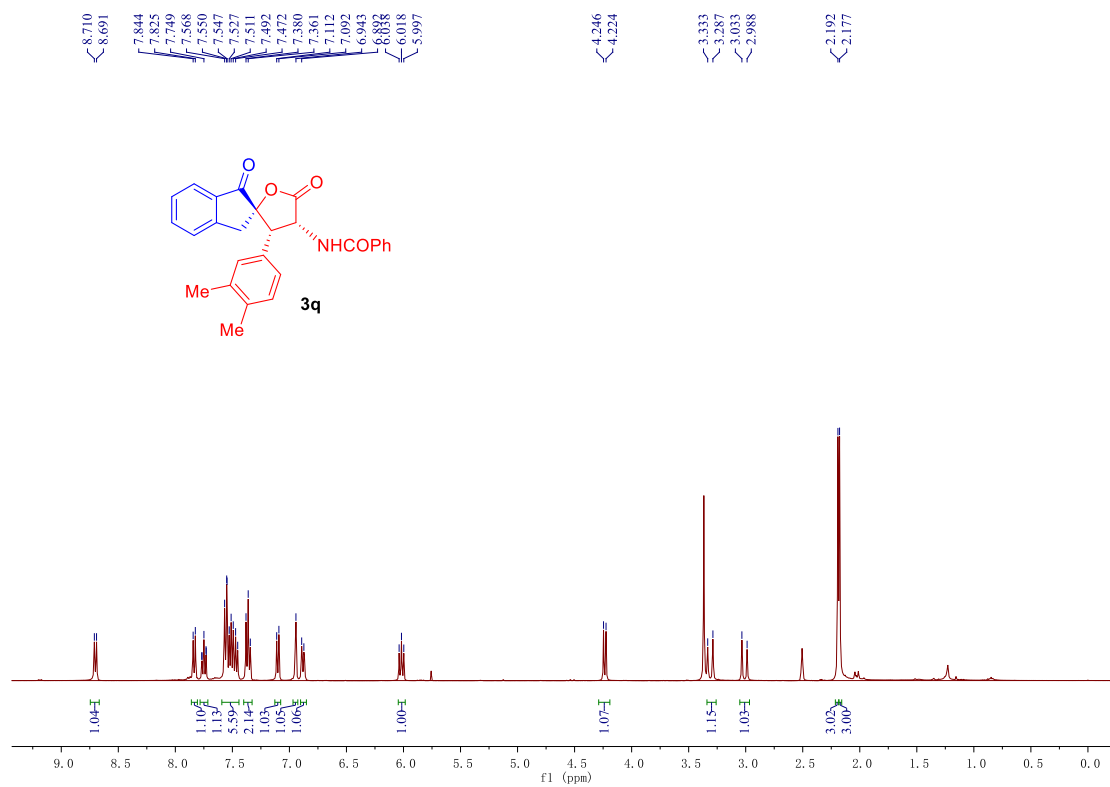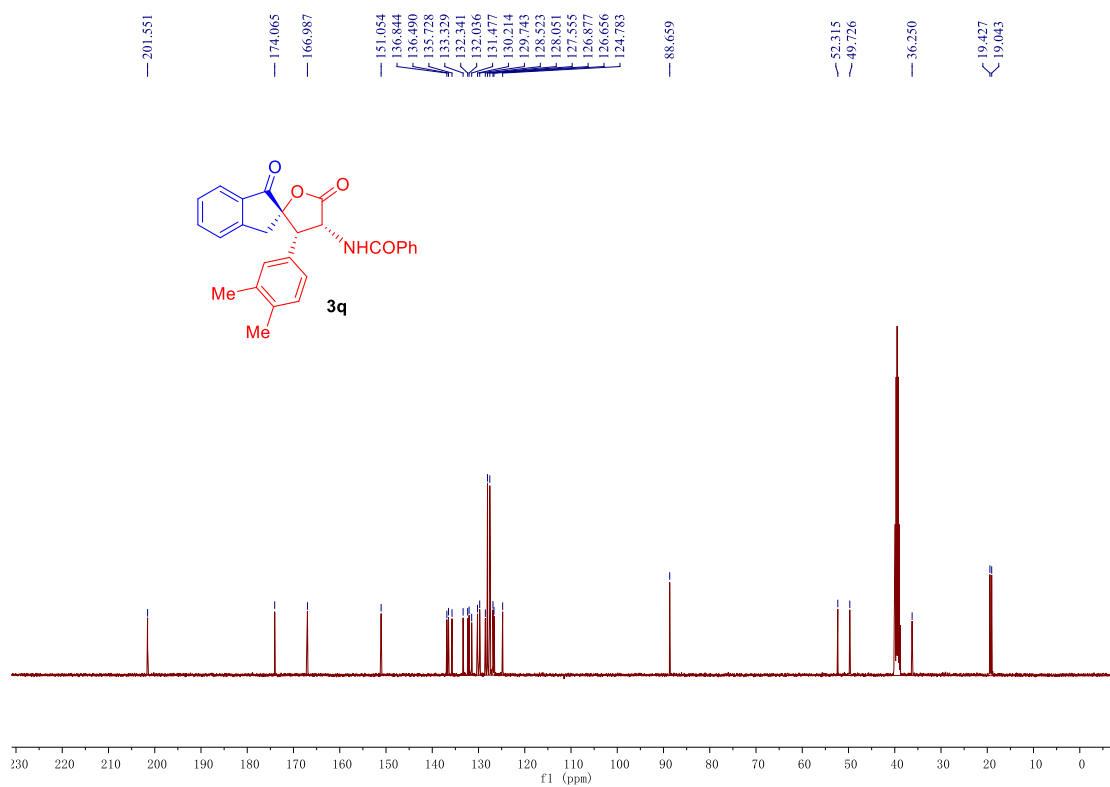

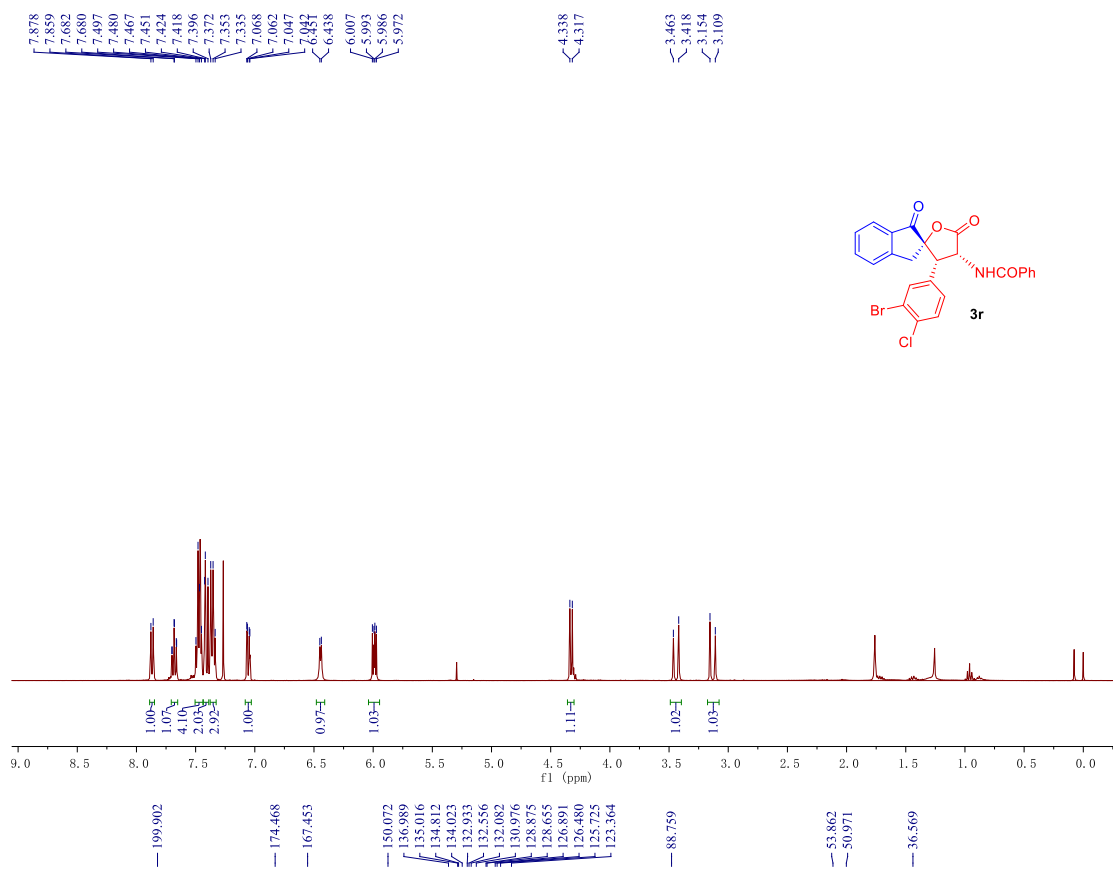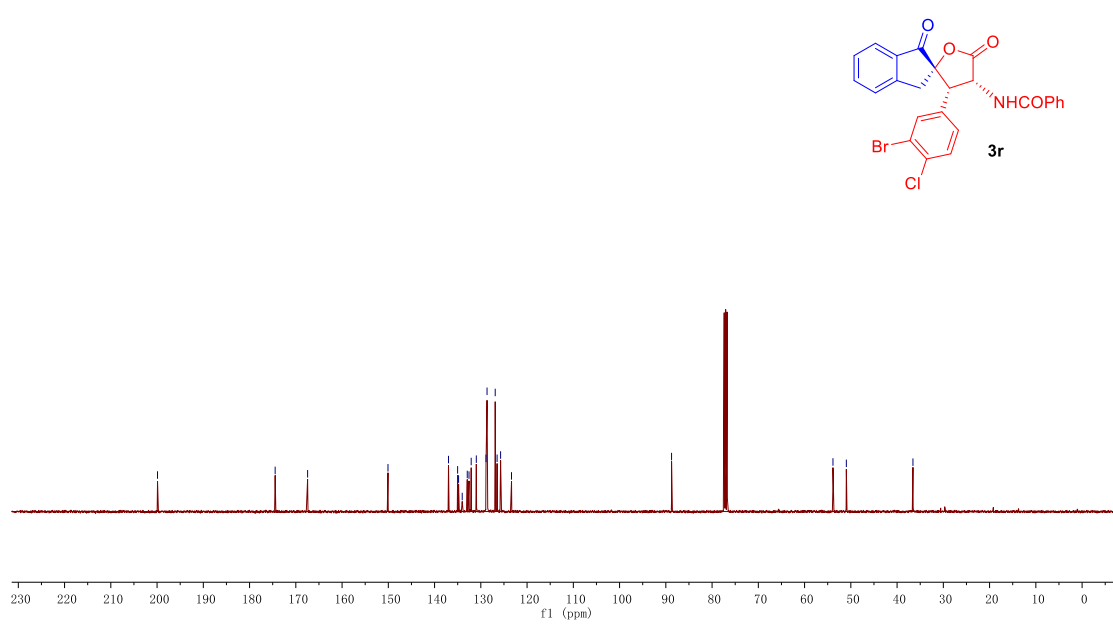

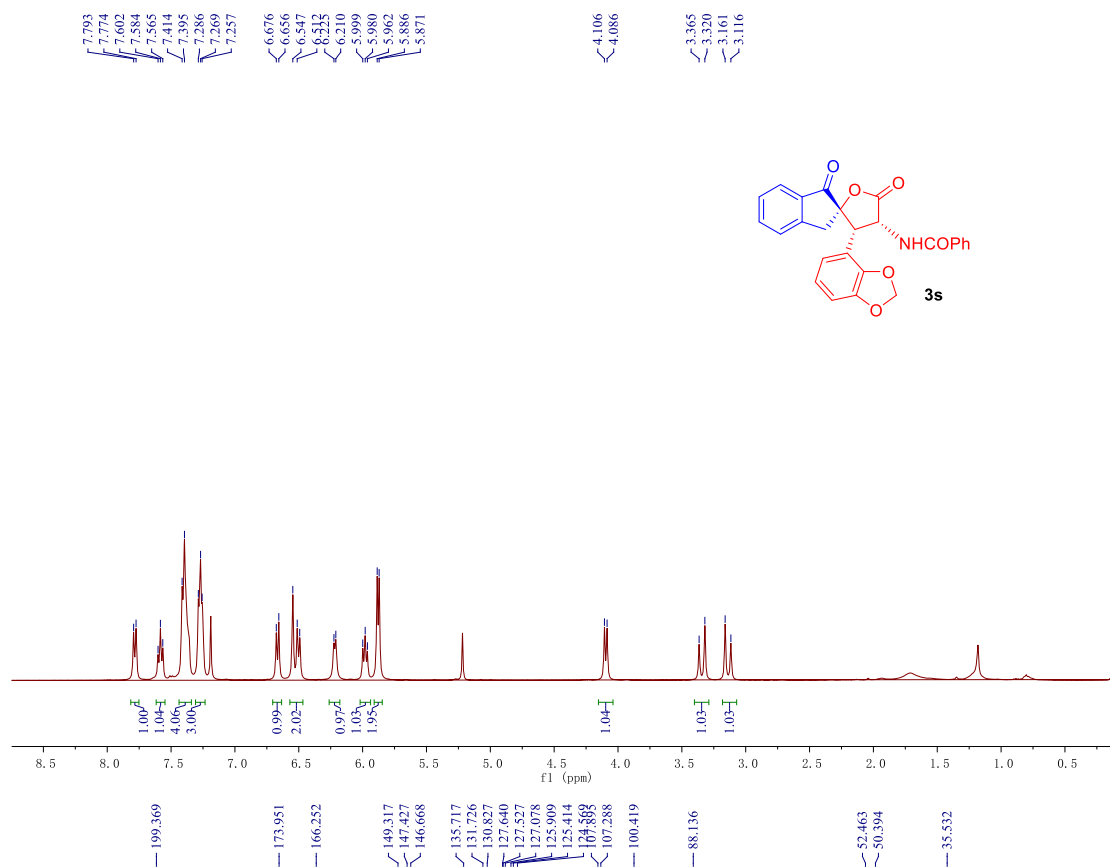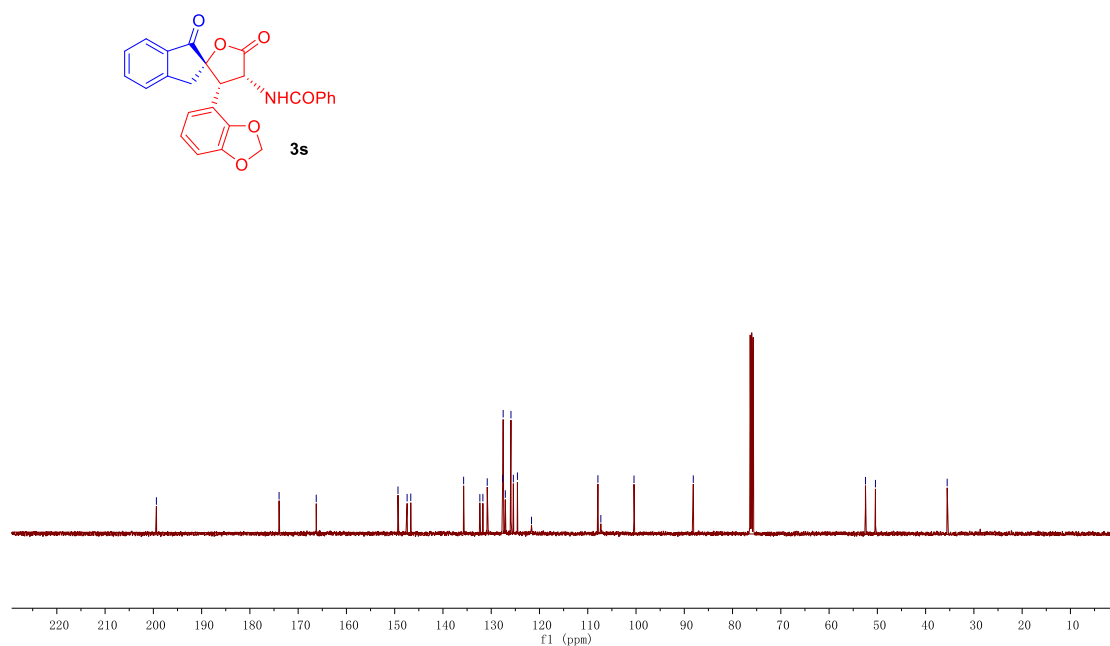

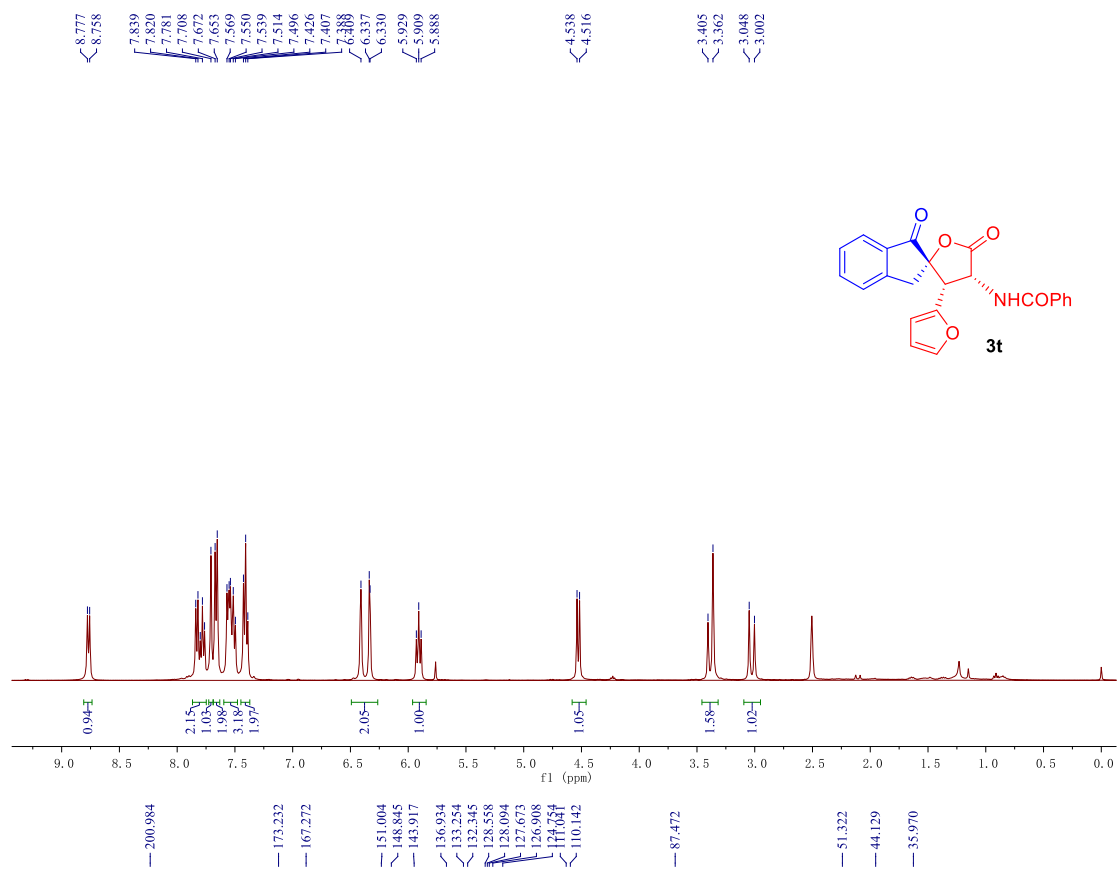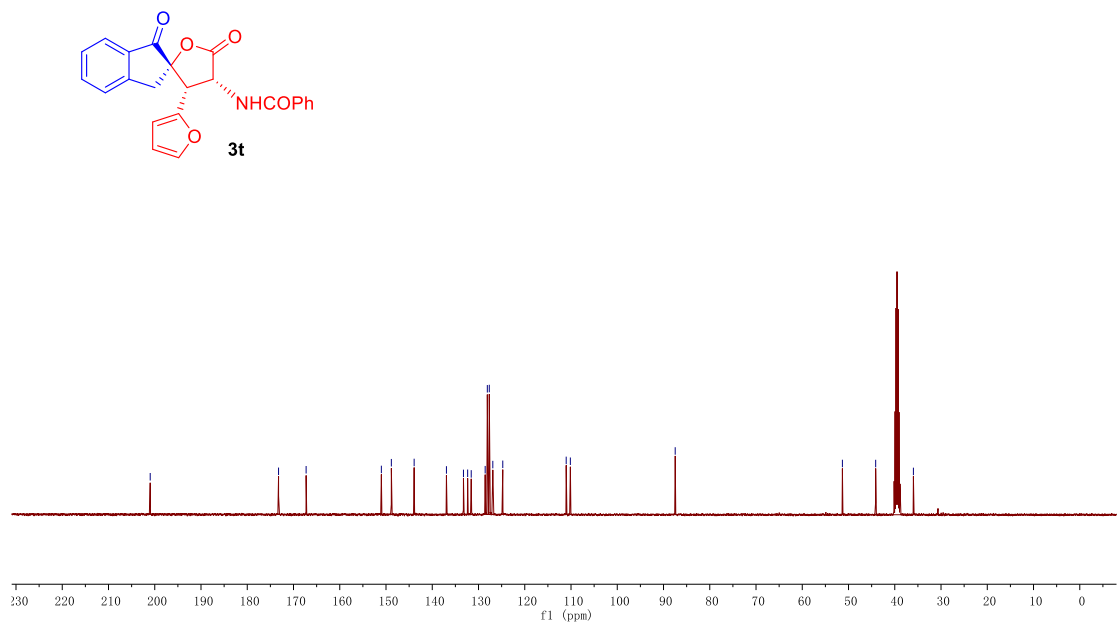

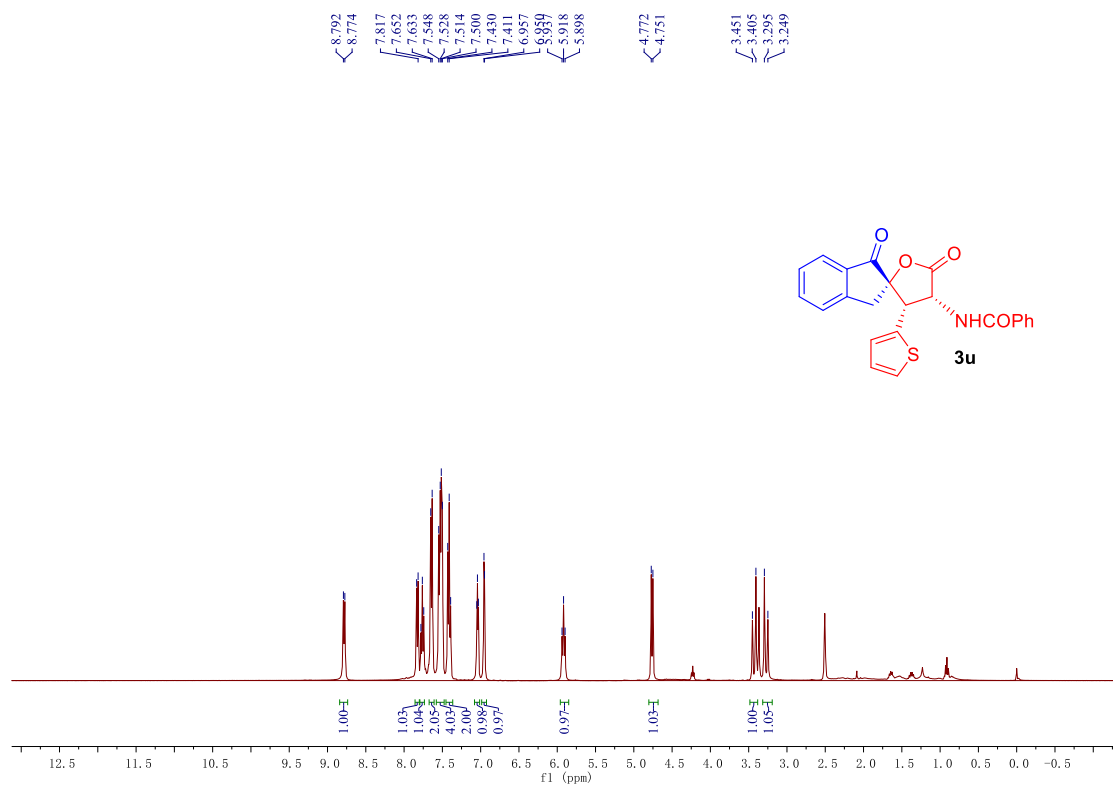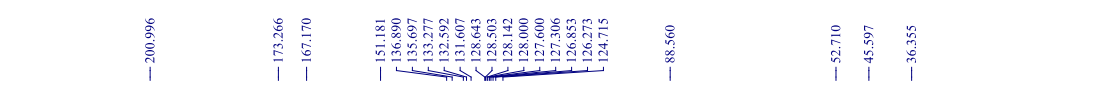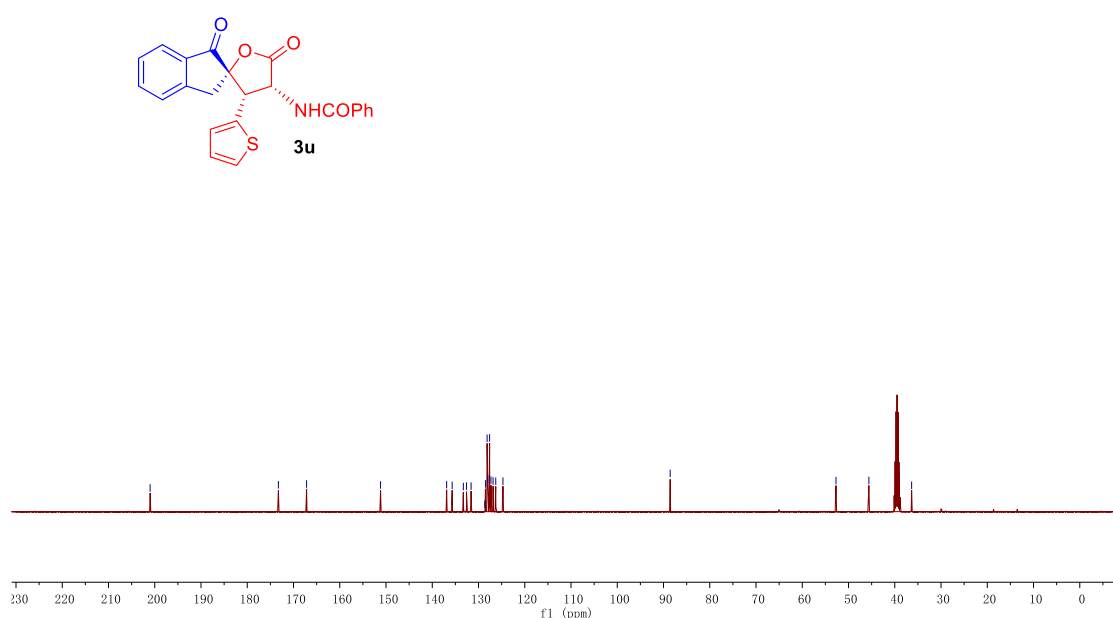

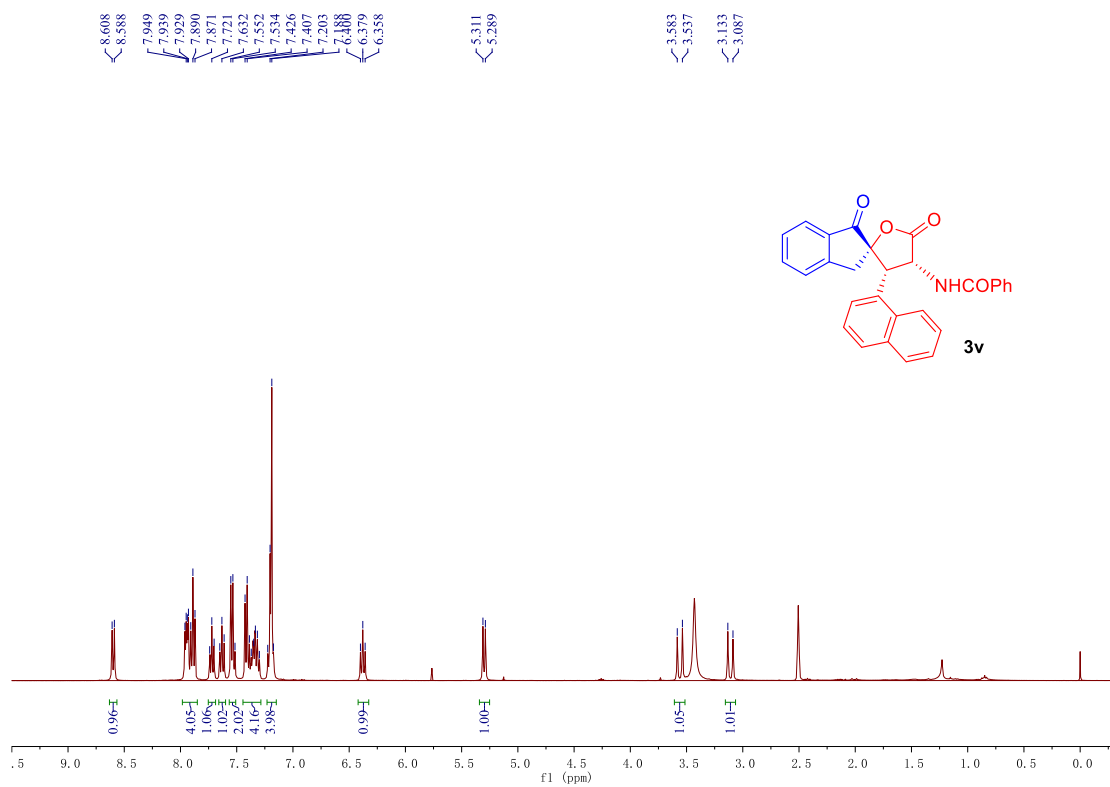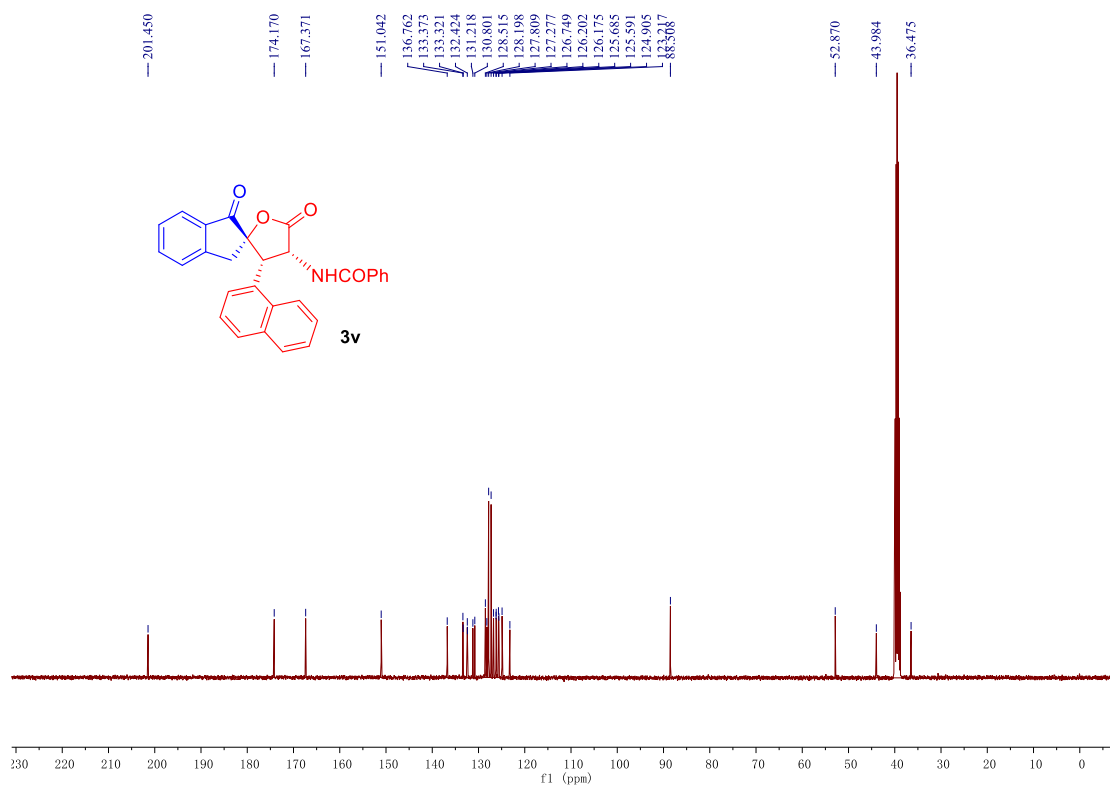

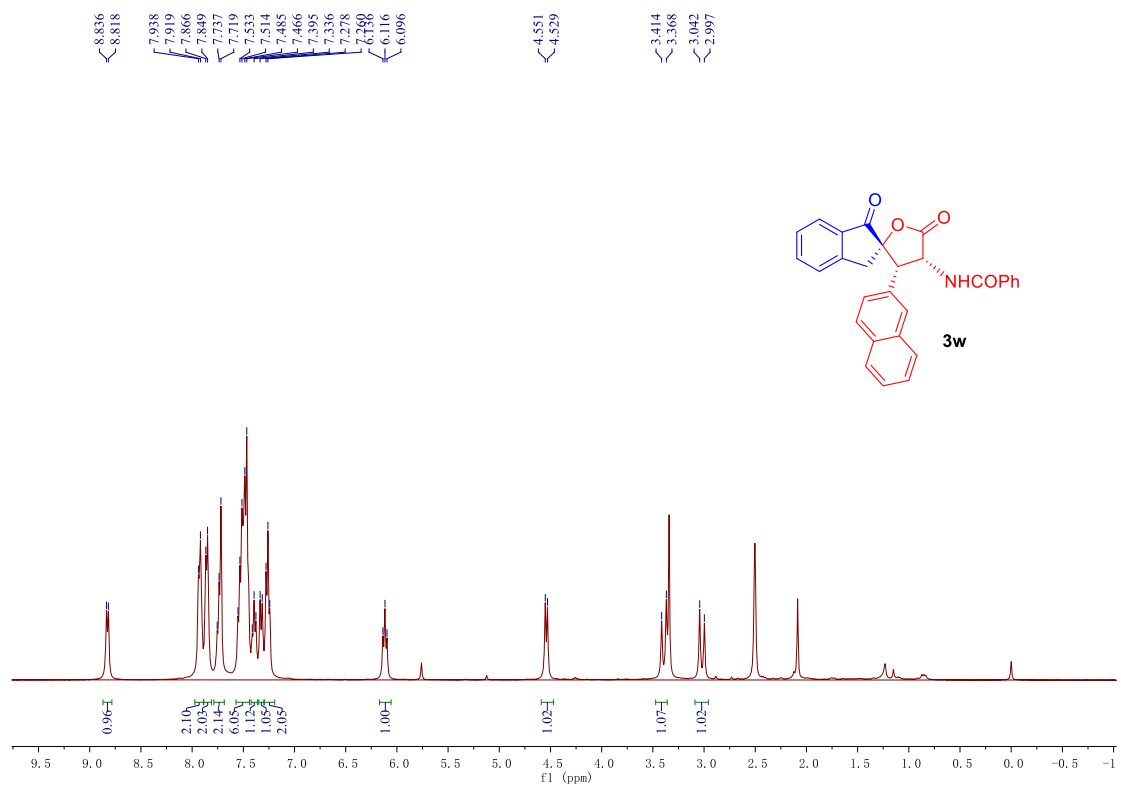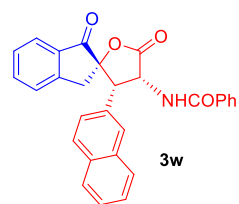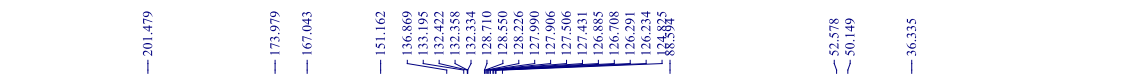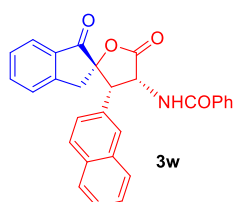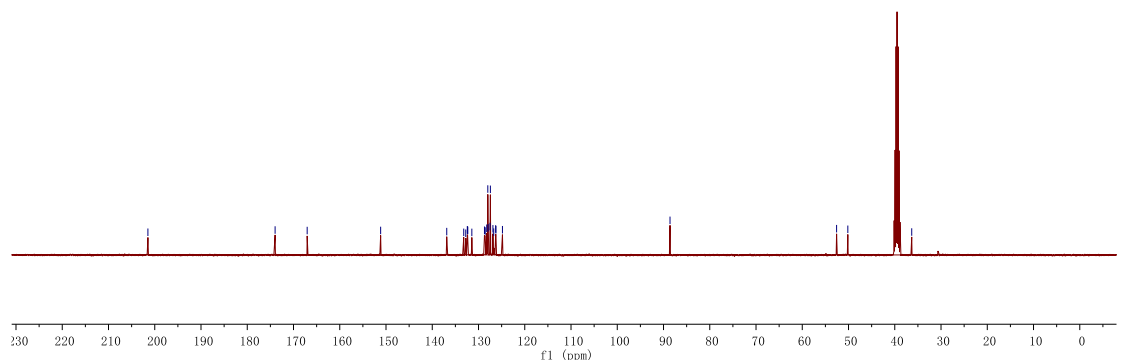

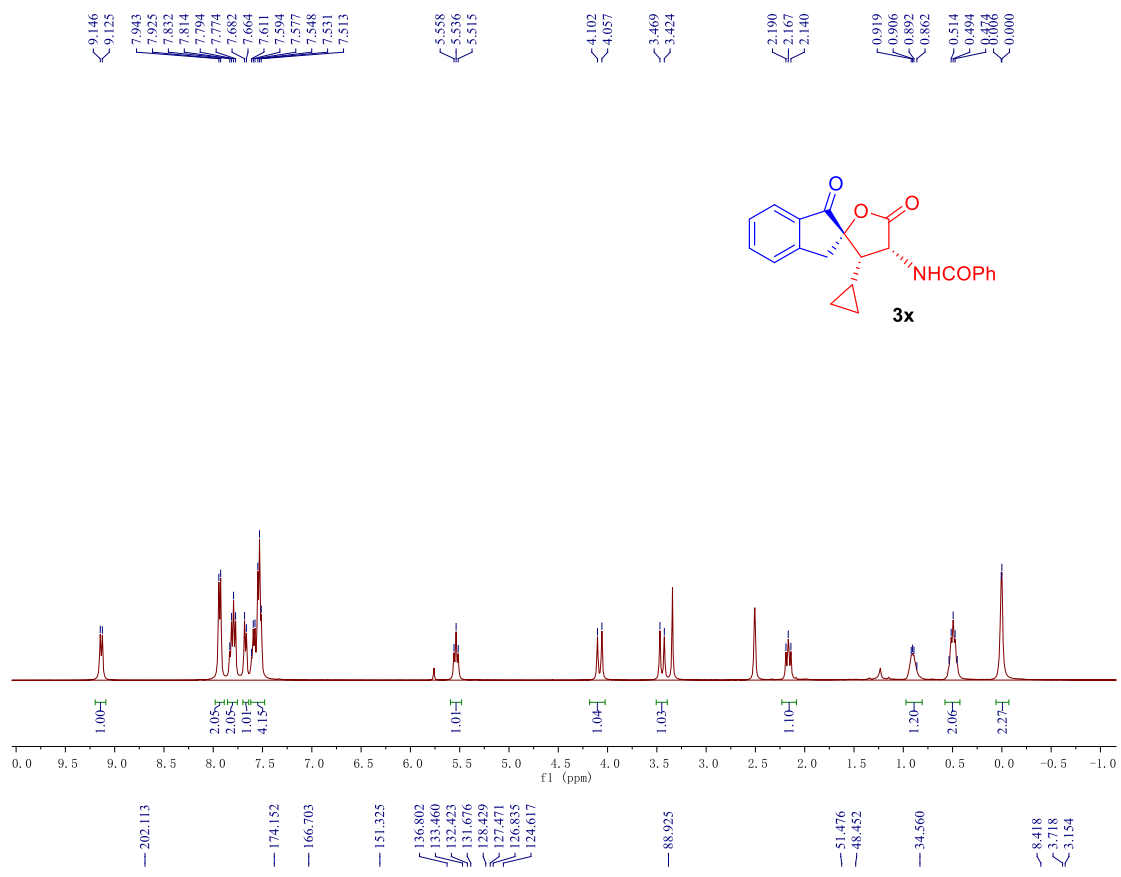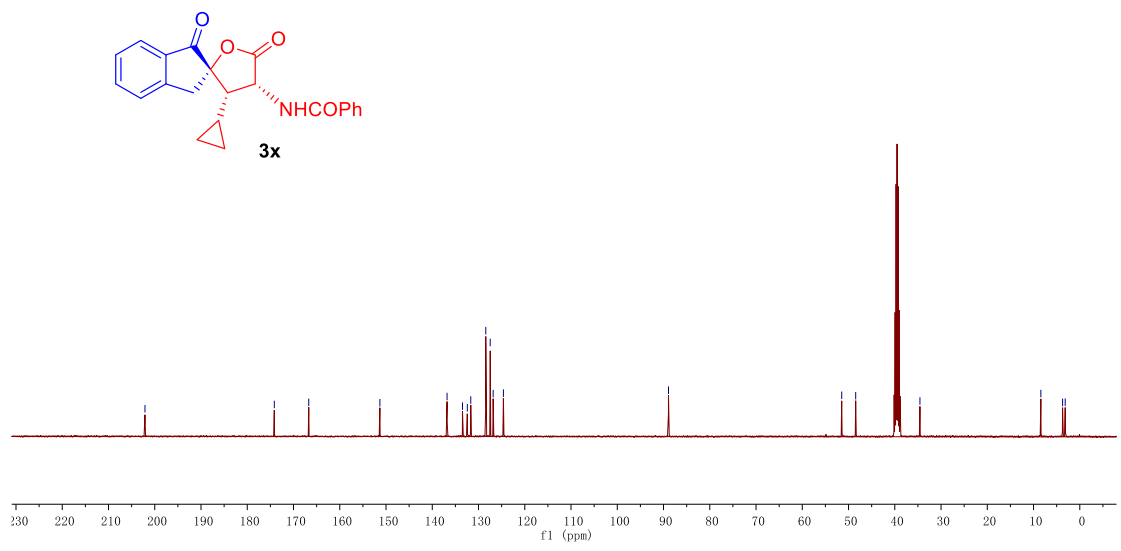



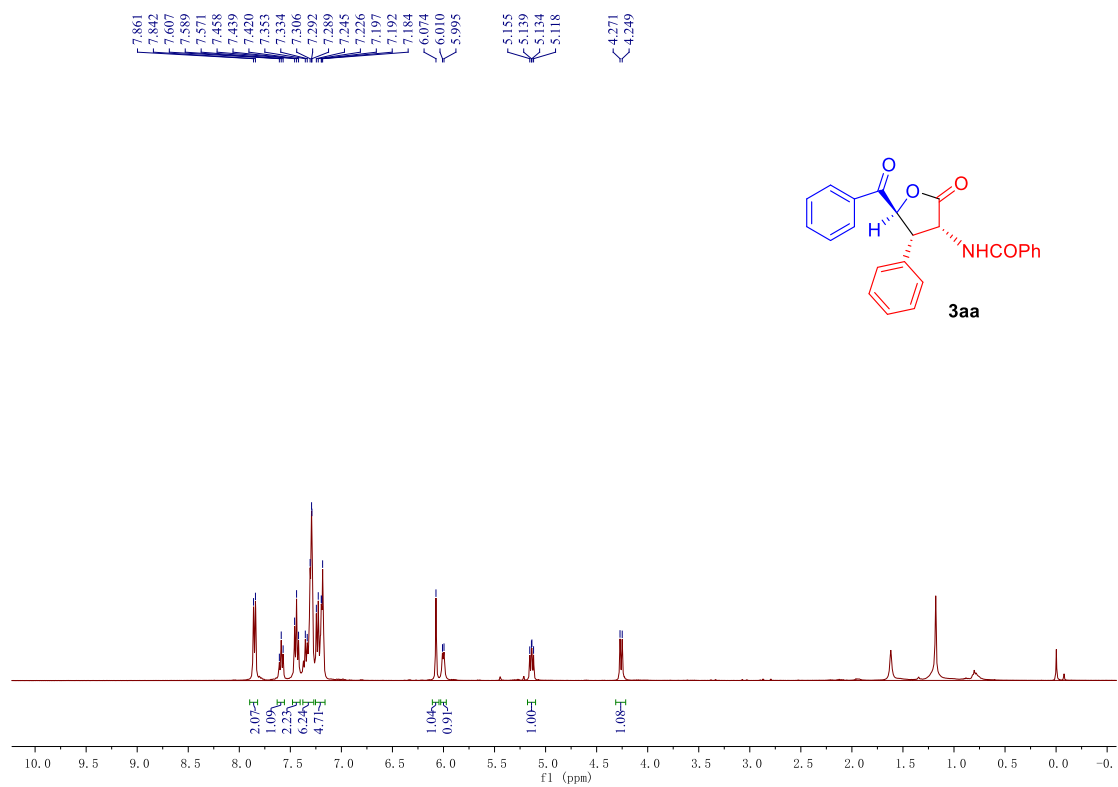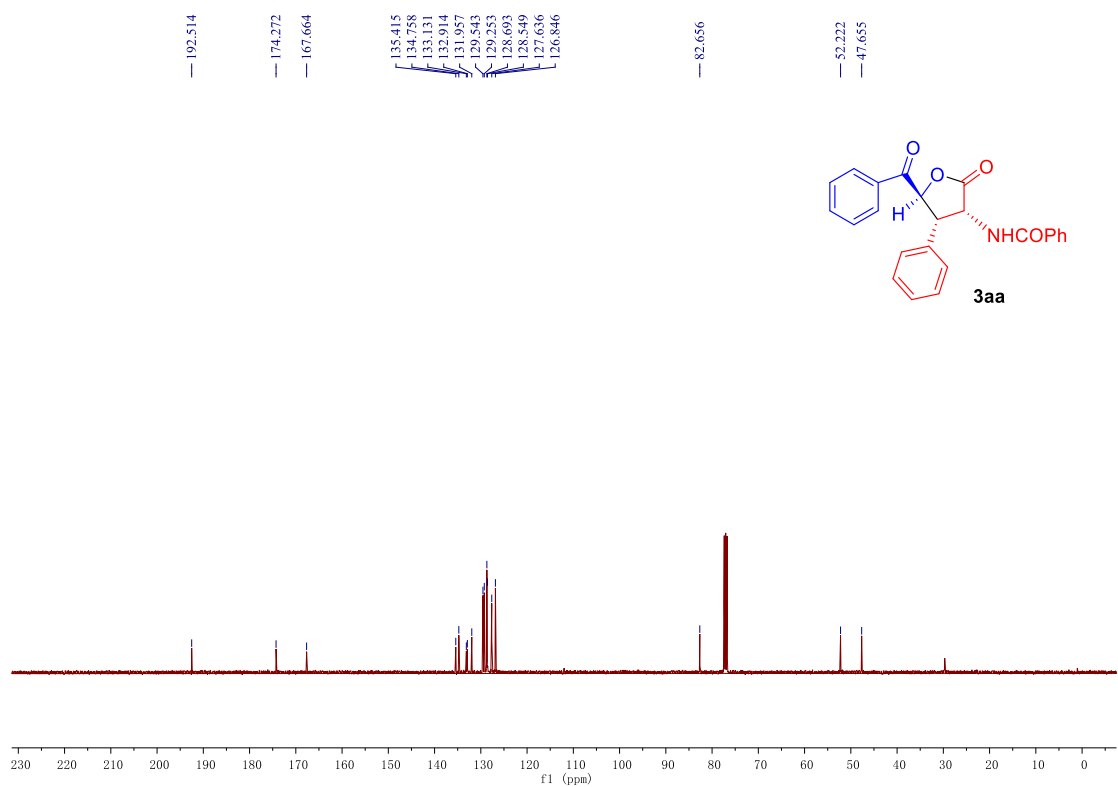

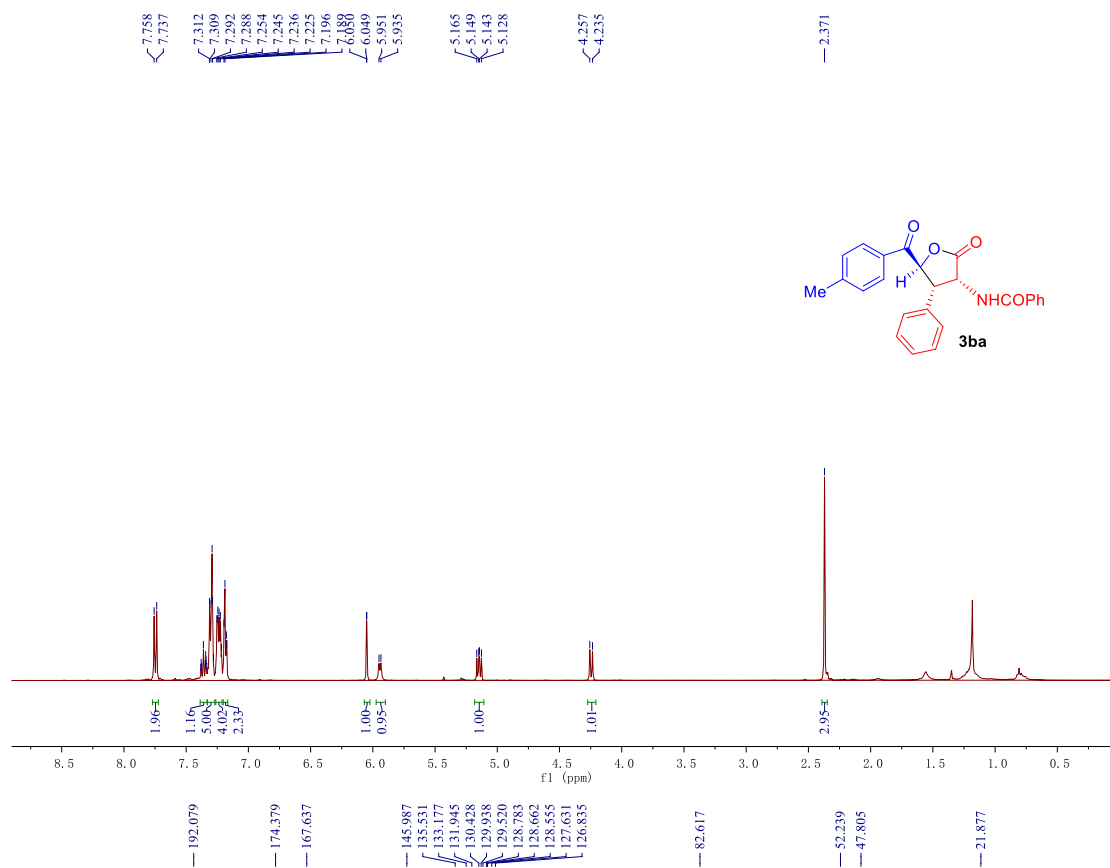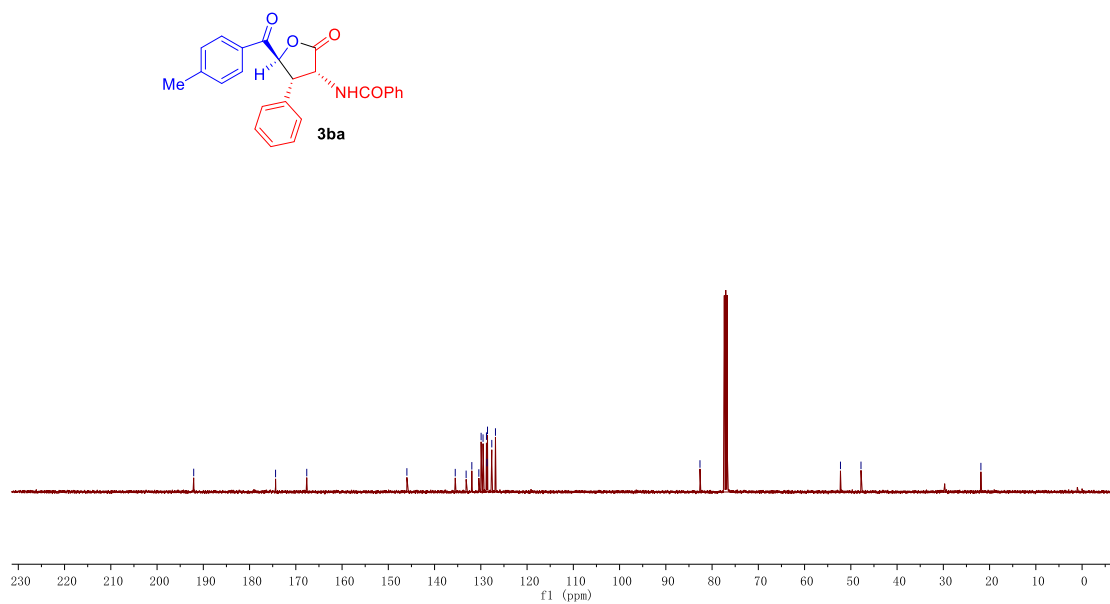

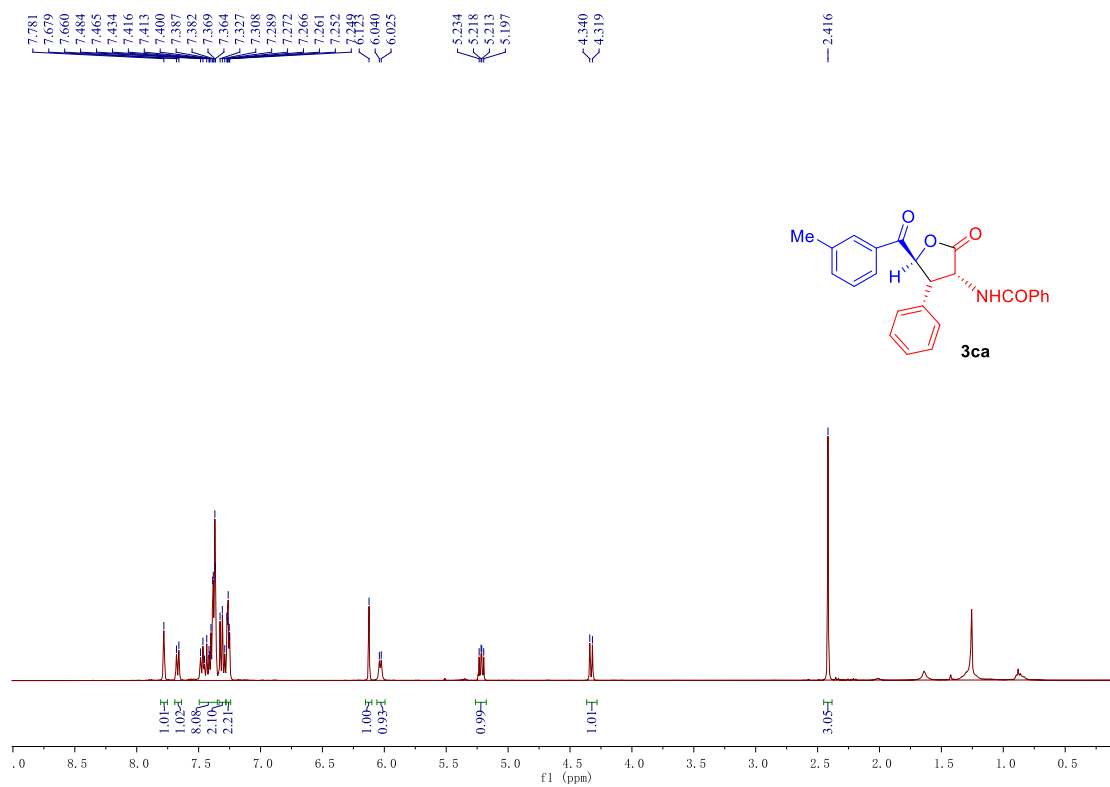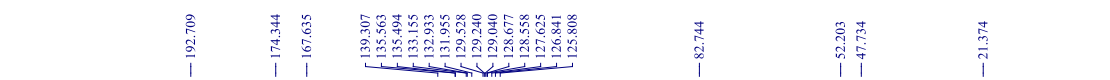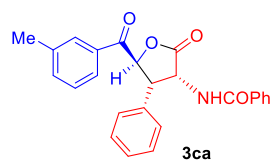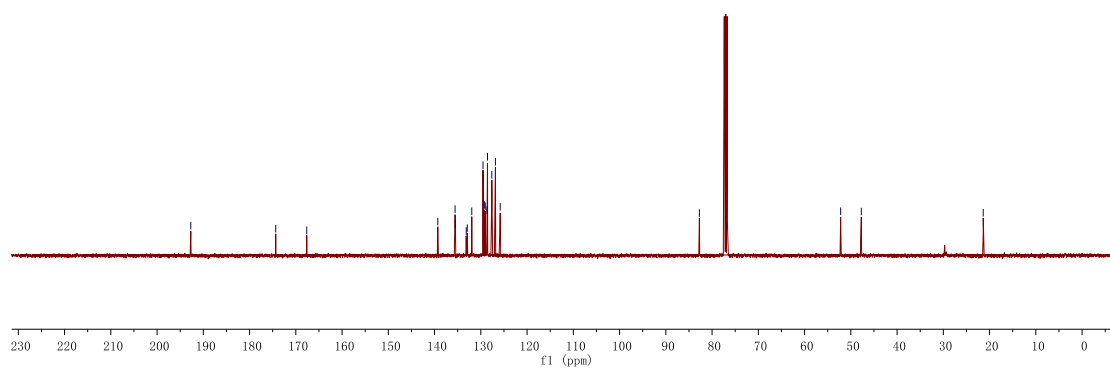

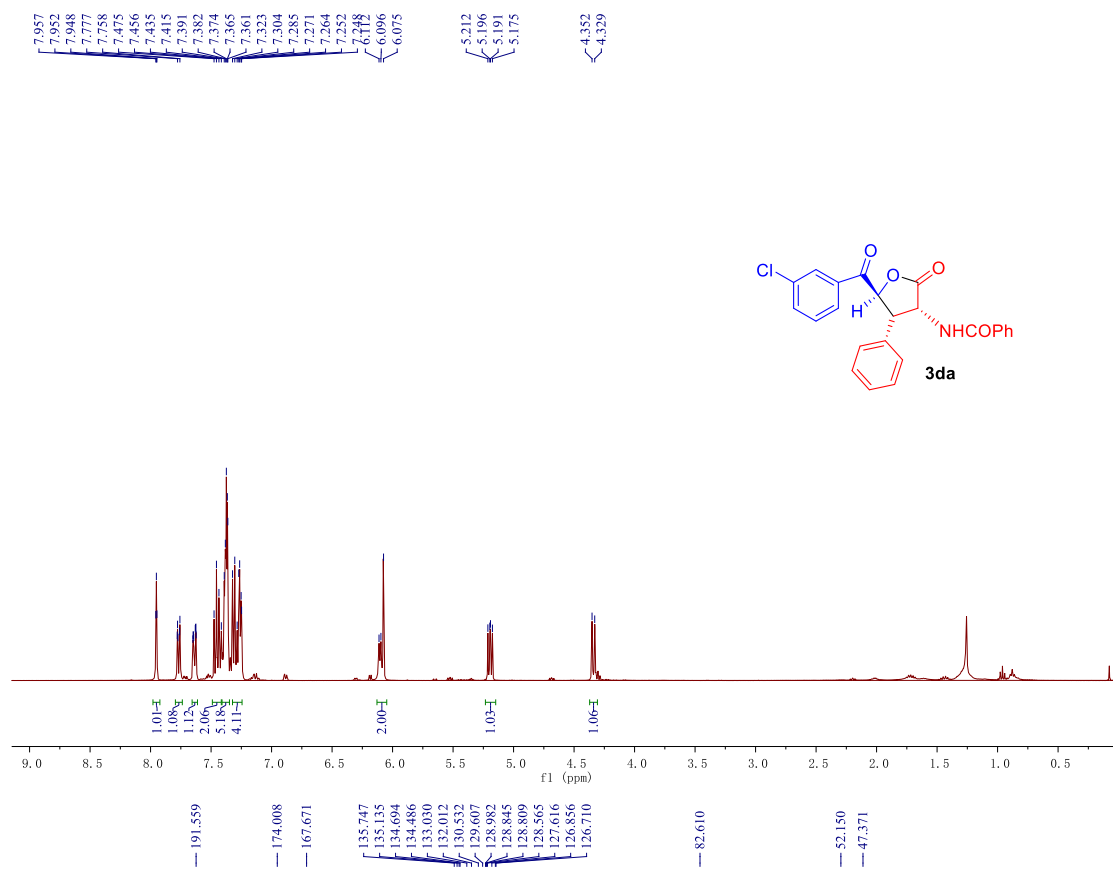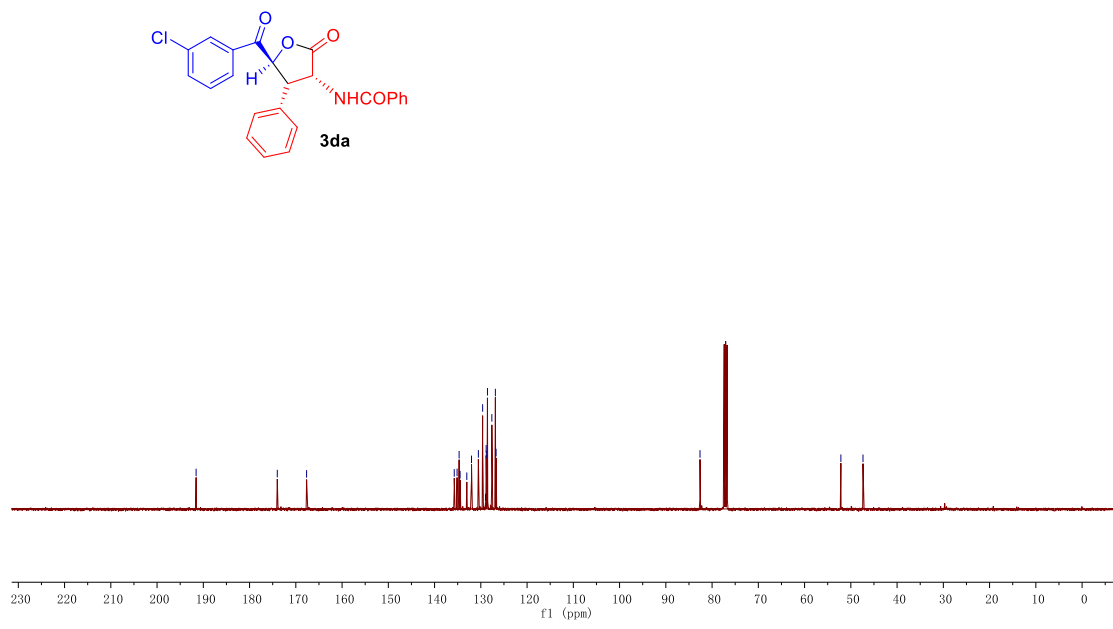

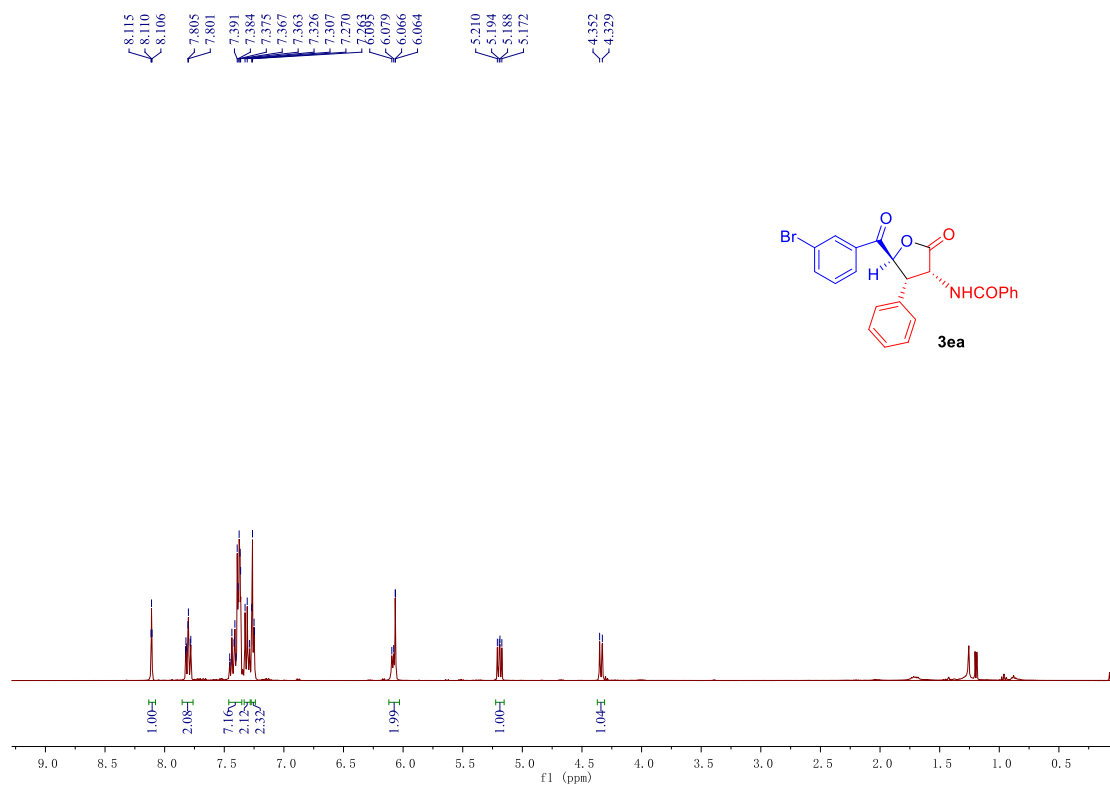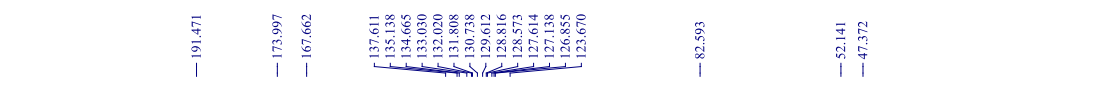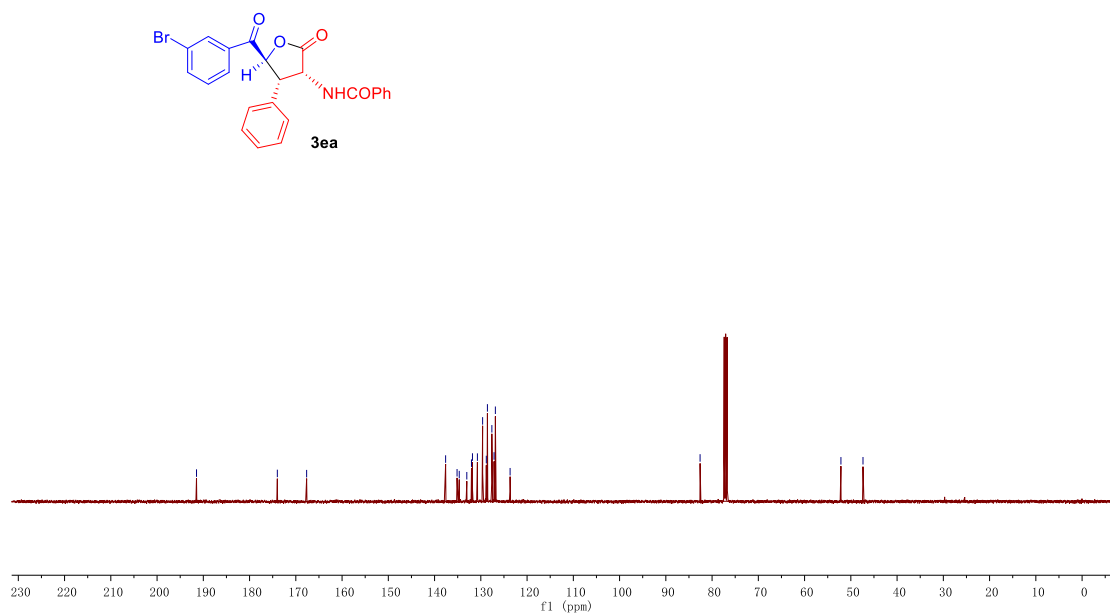

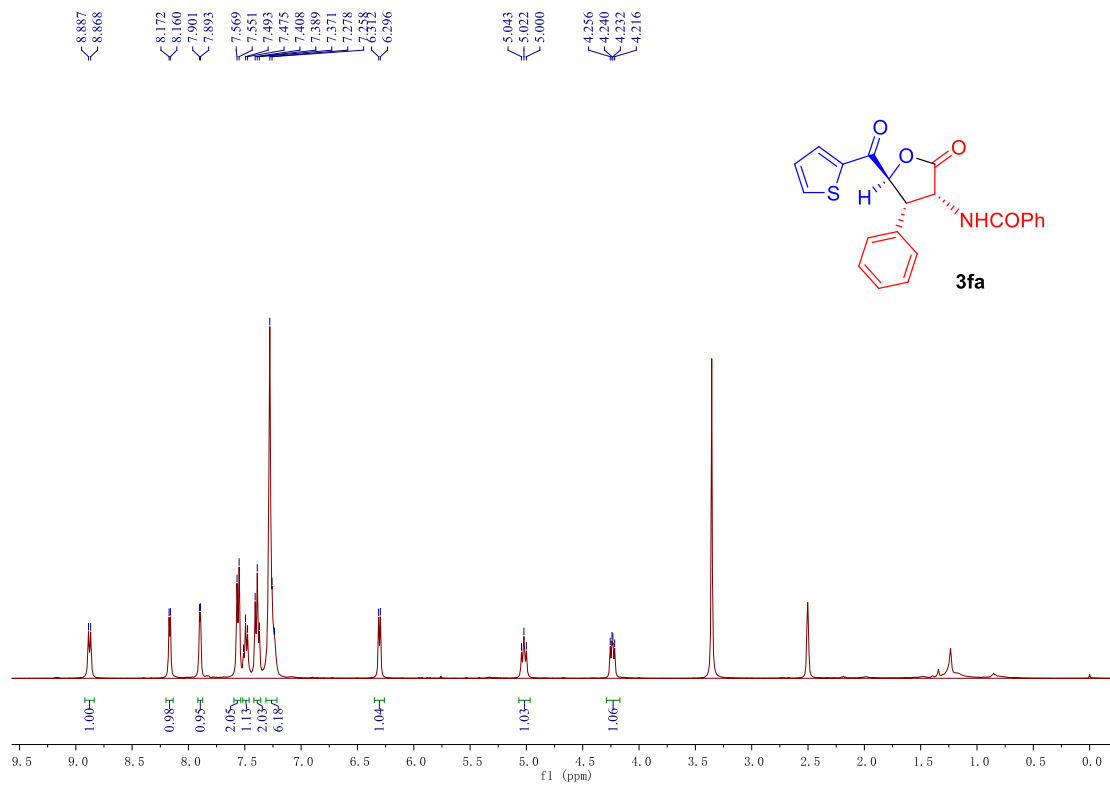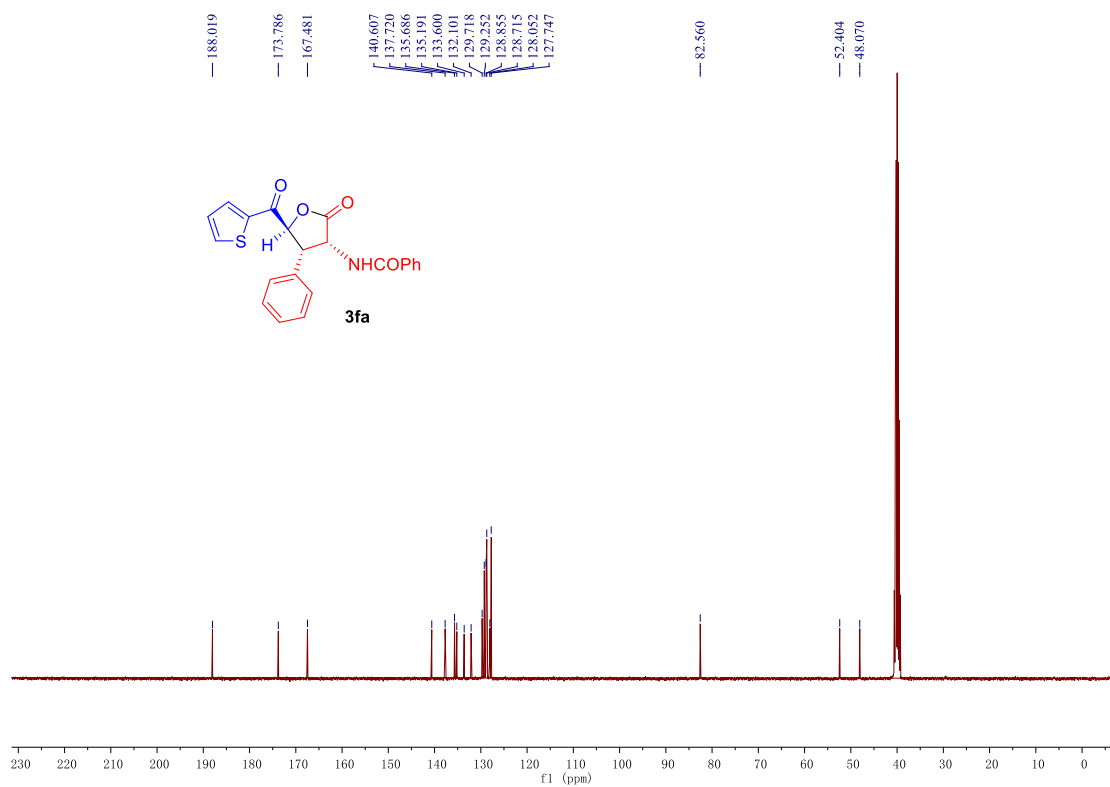

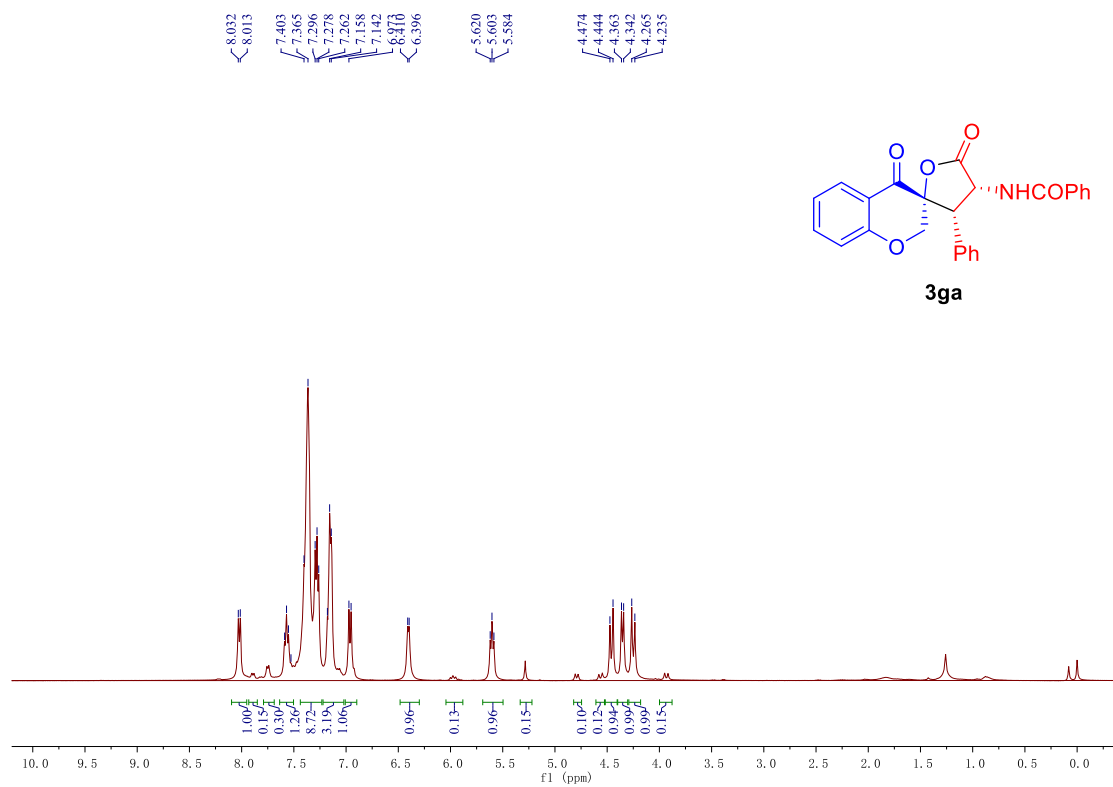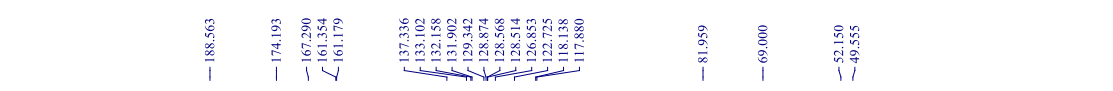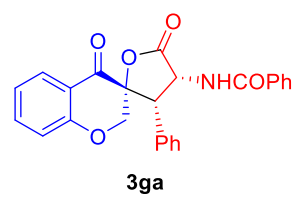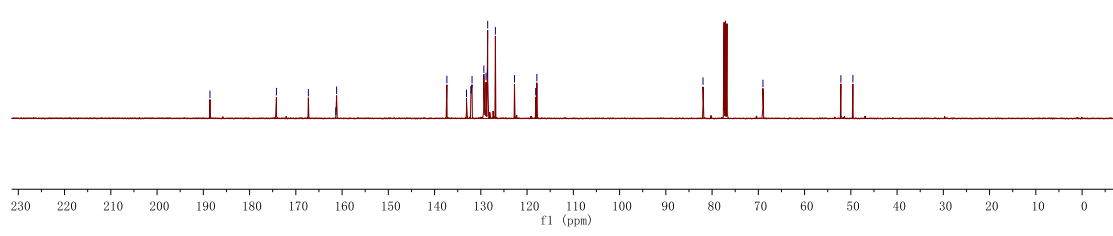

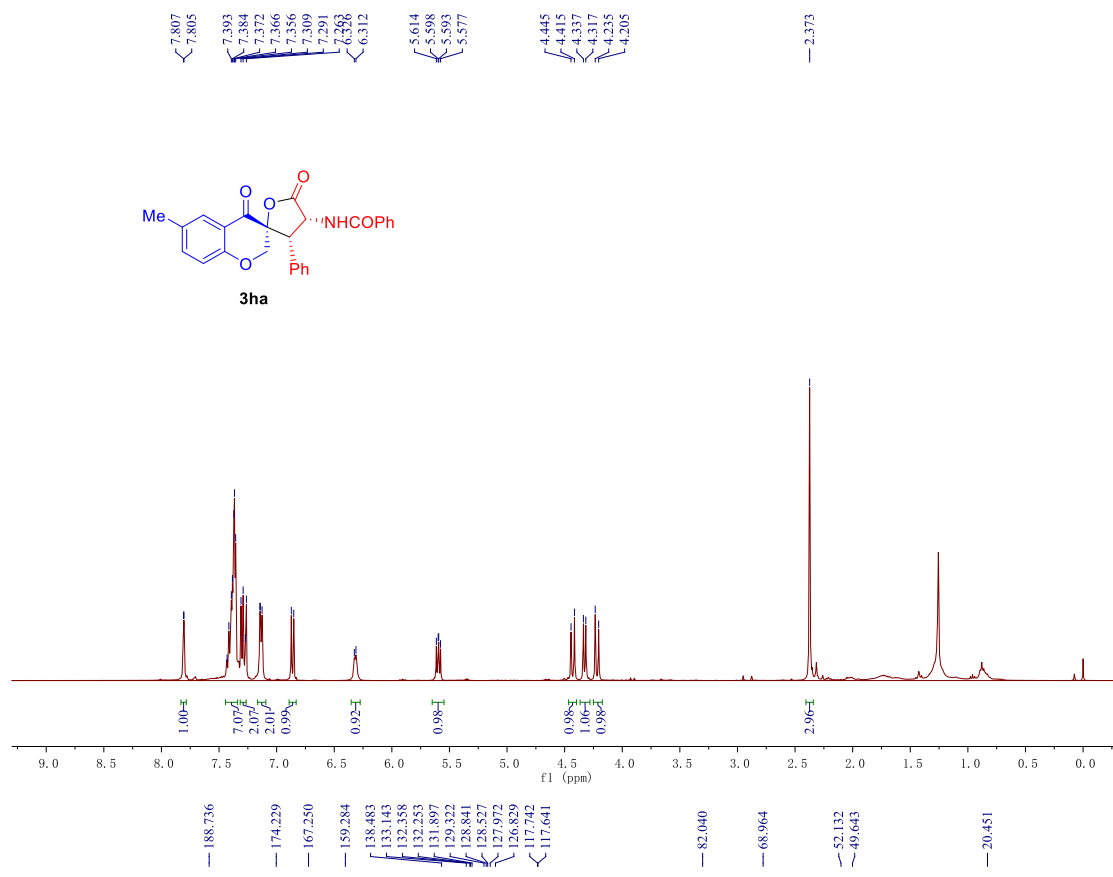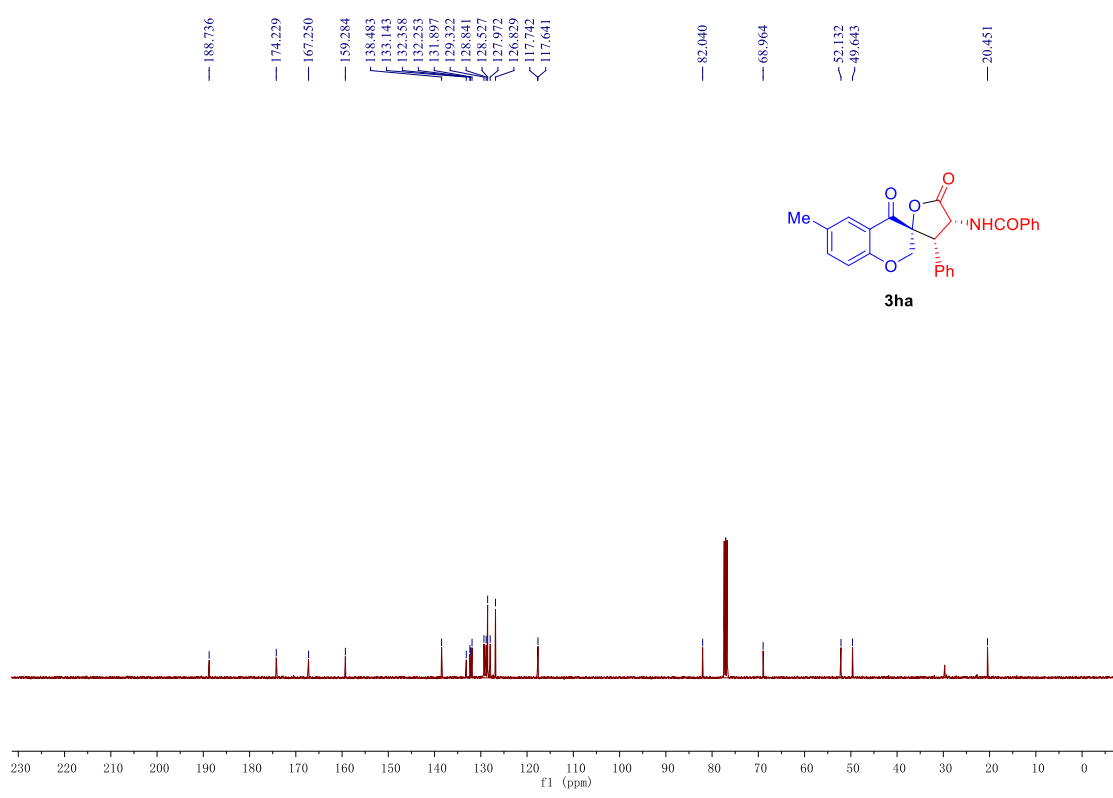



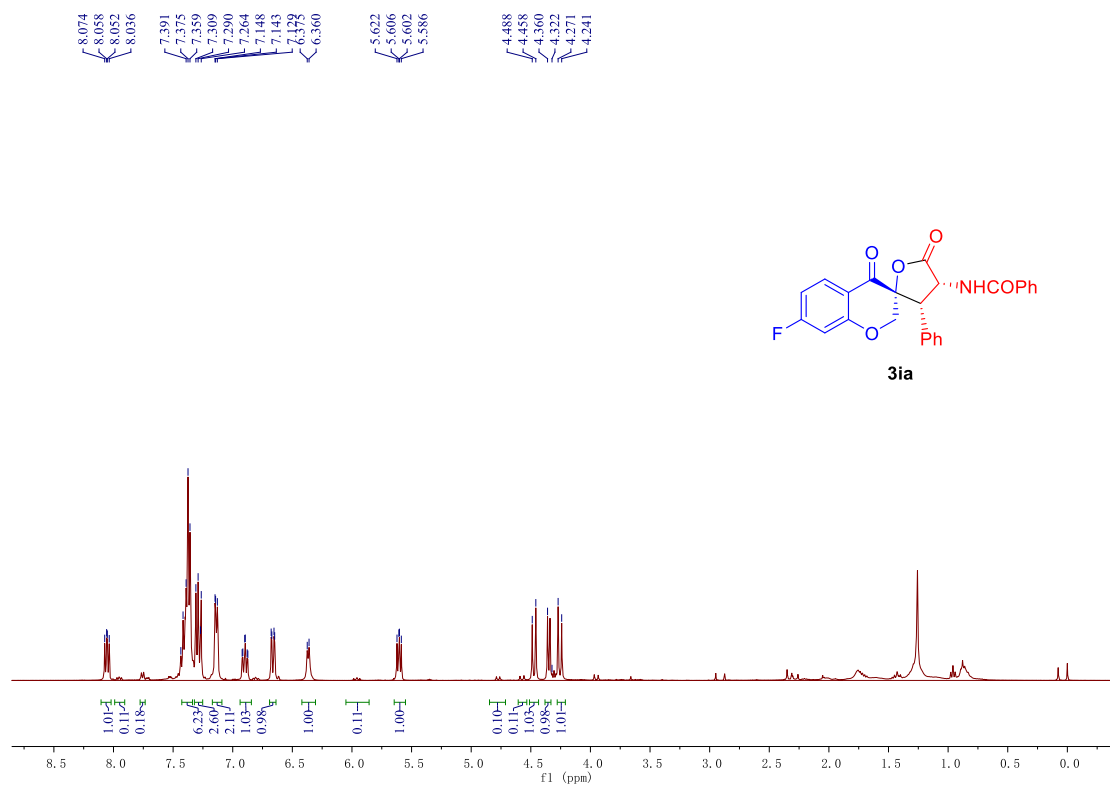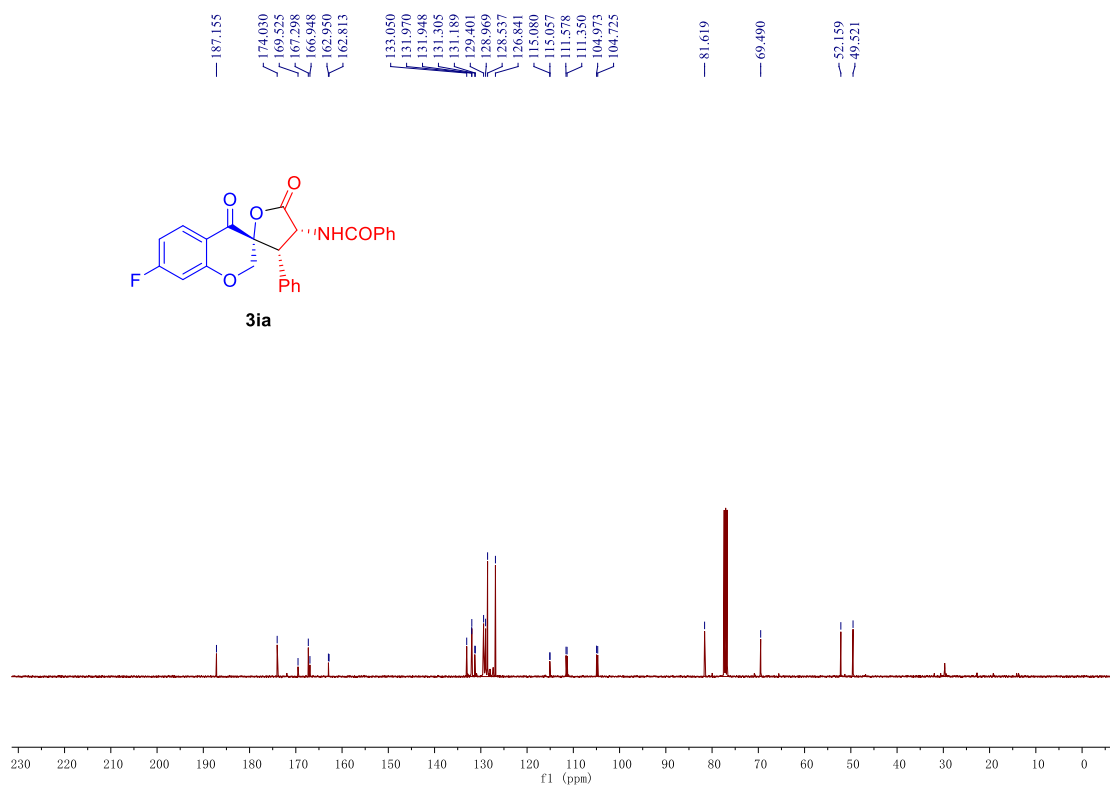

— 97.406

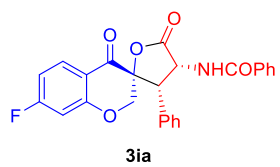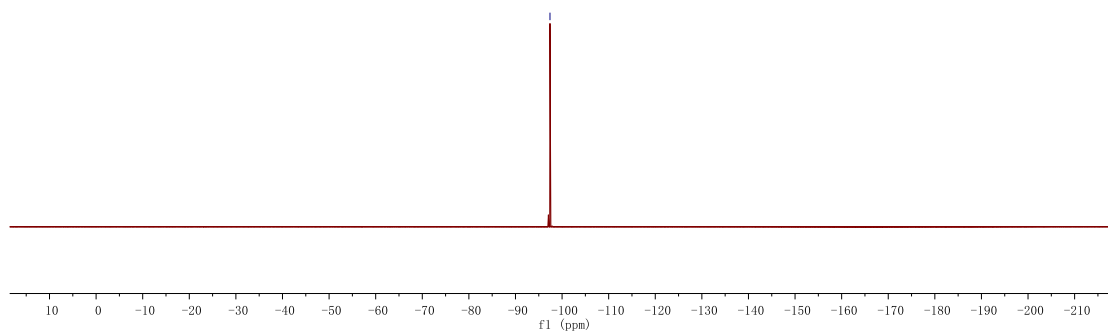

## HPLC spectra of compounds

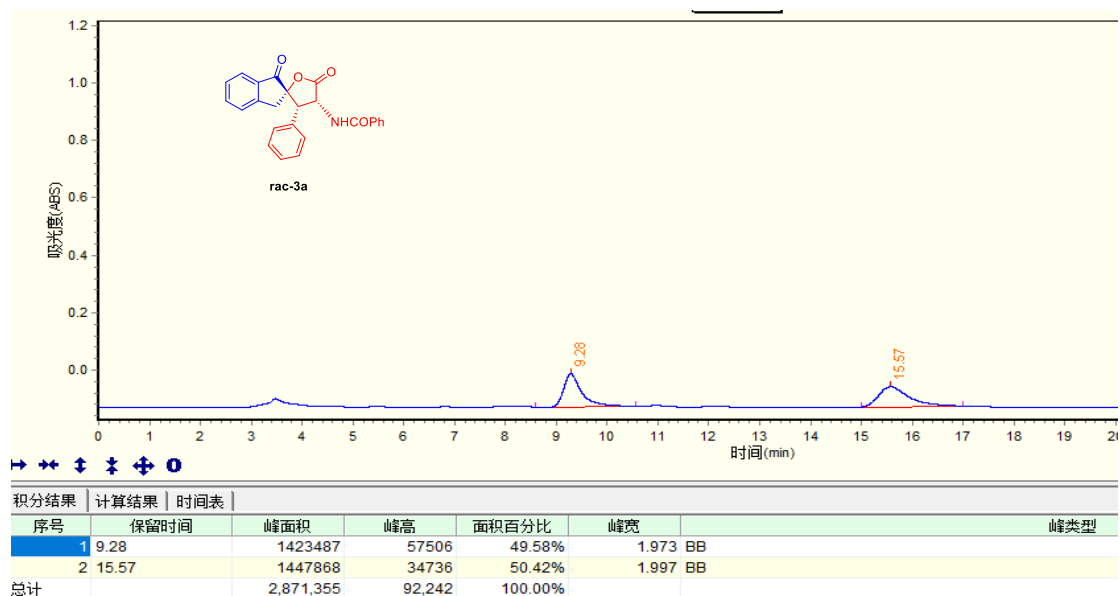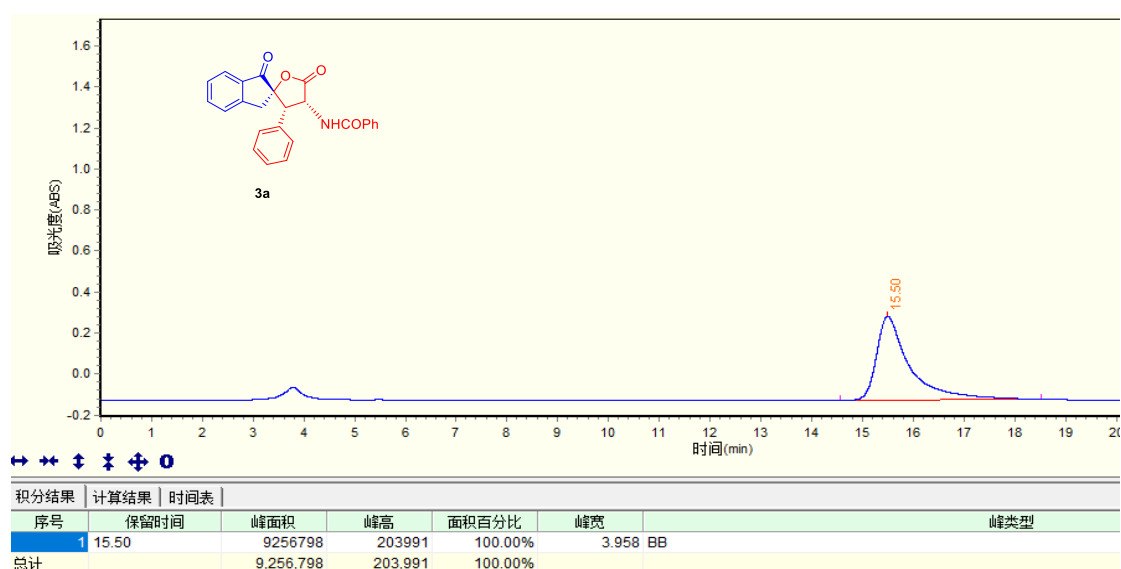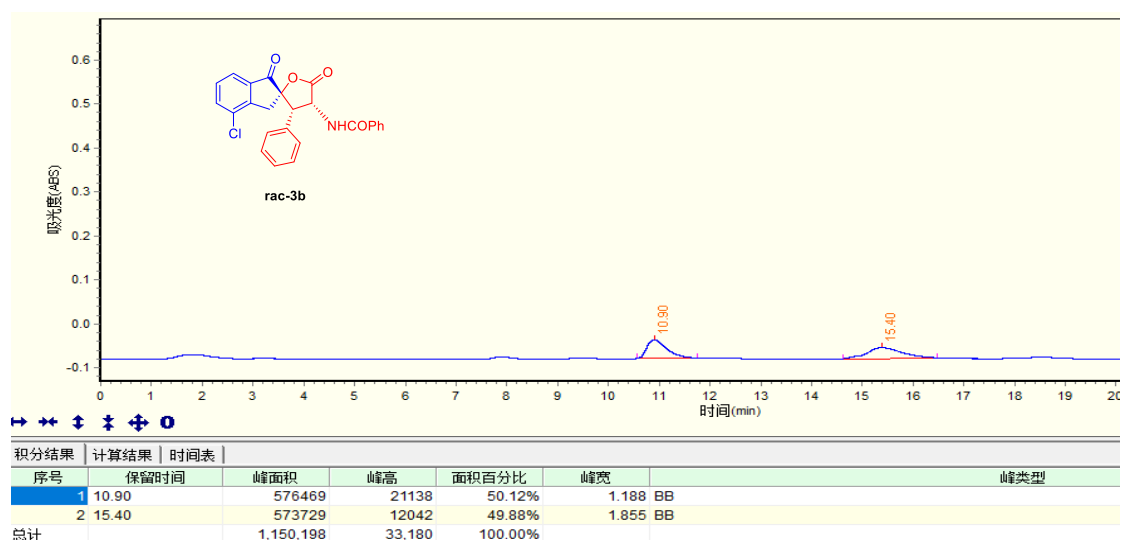

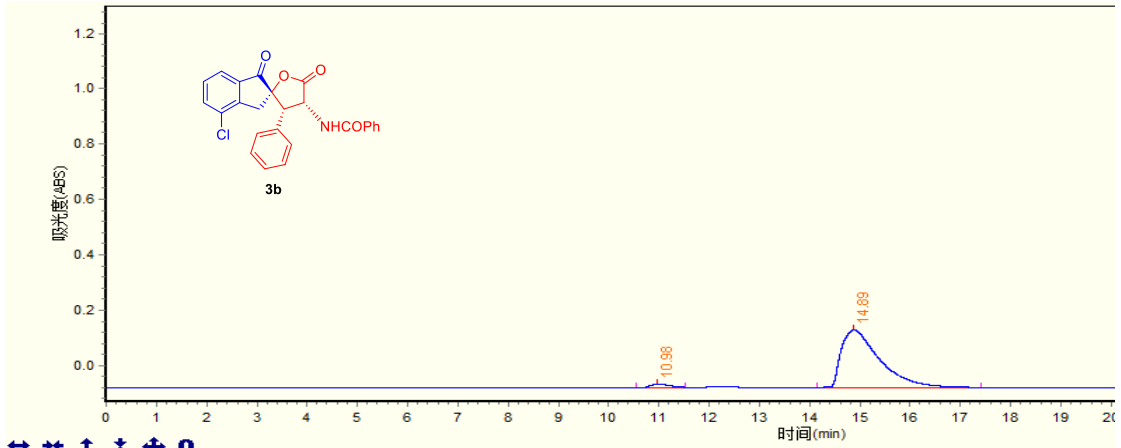

| 序号 | 保留时间  | 峰面积       | 峰高      | 面积百分比   | 峰宽       |
|----|-------|-----------|---------|---------|----------|
| 1  | 10.98 | 169777    | 6717    | 2.97%   | 0.977 BB |
| 2  | 14.89 | 5537069   | 103735  | 97.03%  | 3.265 BB |
| 总计 |       | 5,706,846 | 110,452 | 100.00% |          |

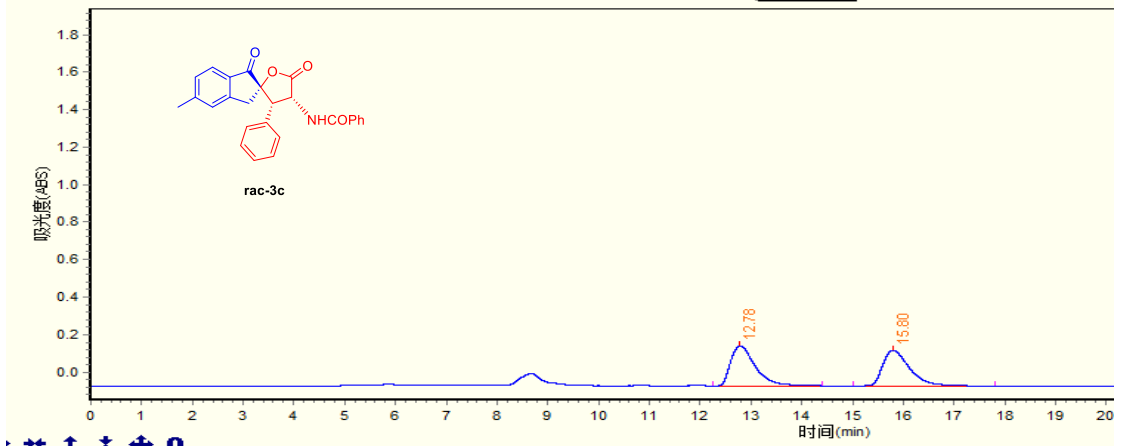

| 序号 | 保留时间  | 峰面积       | 峰高      | 面积百分比   | 峰宽       |
|----|-------|-----------|---------|---------|----------|
| 1  | 12.78 | 3567288   | 106861  | 50.65%  | 2.145 BB |
| 2  | 15.80 | 3475793   | 94401   | 49.35%  | 2.792 BB |
| 总计 |       | 7,043,081 | 201,262 | 100.00% |          |

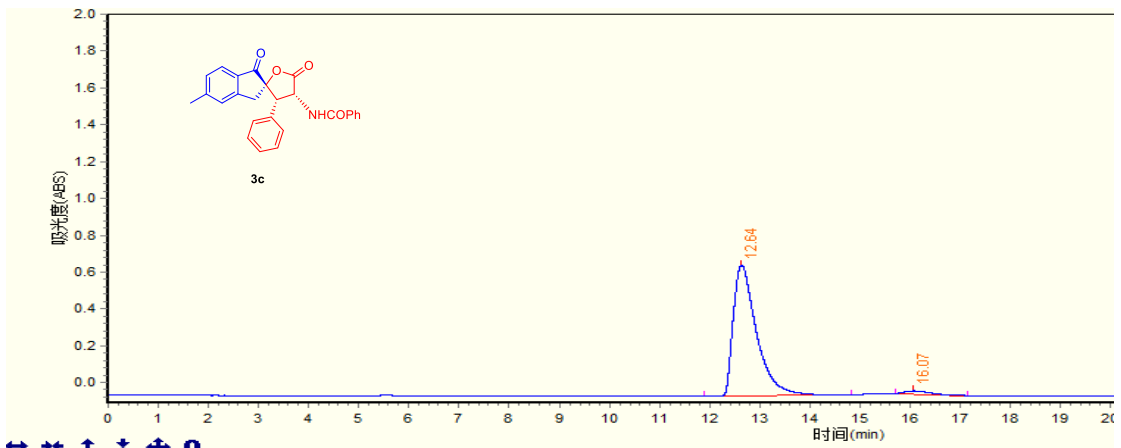

| 序号 | 保留时间  | 峰面积        | 峰高      | 面积百分比   | 峰宽       |
|----|-------|------------|---------|---------|----------|
| 1  | 12.64 | 11440314   | 353878  | 97.37%  | 2.936 BB |
| 2  | 16.07 | 308541     | 8940    | 2.63%   | 1.438 BB |
| 总计 |       | 11,748,855 | 362,818 | 100.00% |          |

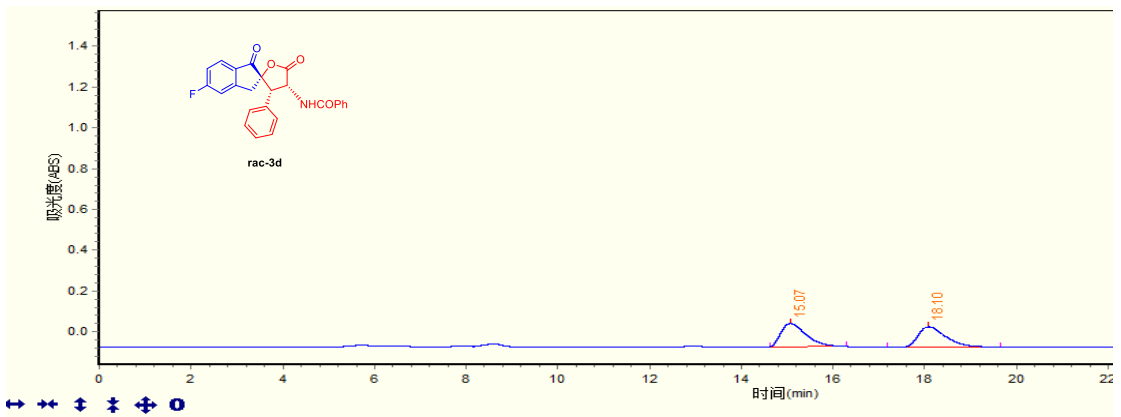

| 序号 | 保留时间  | 峰面积       | 峰高      | 面积百分比   | 峰宽    | 峰类 |
|----|-------|-----------|---------|---------|-------|----|
| 1  | 15.07 | 2157008   | 56660   | 50.57%  | 1.666 | BB |
| 2  | 18.10 | 2108625   | 49870   | 49.43%  | 2.468 | BB |
| 总计 |       | 4,265,633 | 106,530 | 100.00% |       |    |

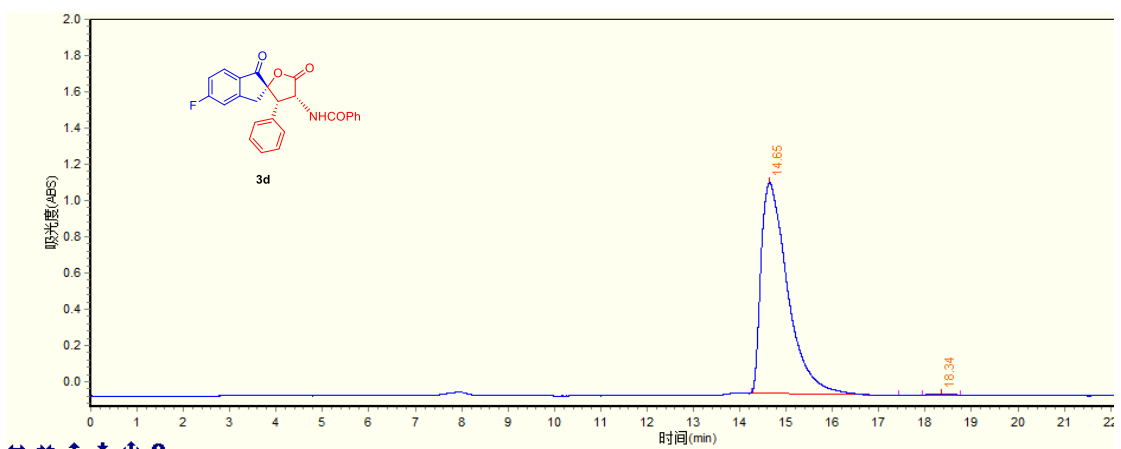

| 序号 | 保留时间  | 峰面积        | 峰高      | 面积百分比   | 峰宽    | 峰类型 |
|----|-------|------------|---------|---------|-------|-----|
| 1  | 14.65 | 23072111   | 580581  | 99.64%  | 3.173 | BB  |
| 2  | 18.34 | 82933      | 2854    | 0.36%   | 0.819 | BB  |
| 总计 |       | 23,155,044 | 583,435 | 100.00% |       |     |

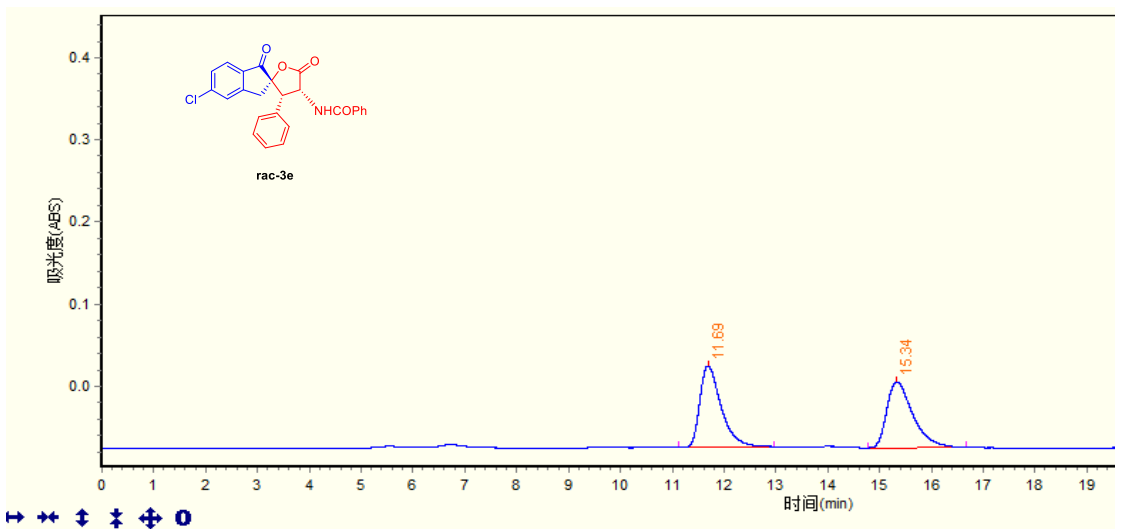

| 序号 | 保留时间  | 峰面积       | 峰高     | 面积百分比   | 峰宽    | 峰类 |
|----|-------|-----------|--------|---------|-------|----|
| 1  | 11.69 | 1408981   | 49401  | 50.27%  | 1.84  | BB |
| 2  | 15.34 | 1393842   | 39714  | 49.73%  | 1.895 | BB |
| 总计 |       | 2,802,823 | 89,115 | 100.00% |       |    |

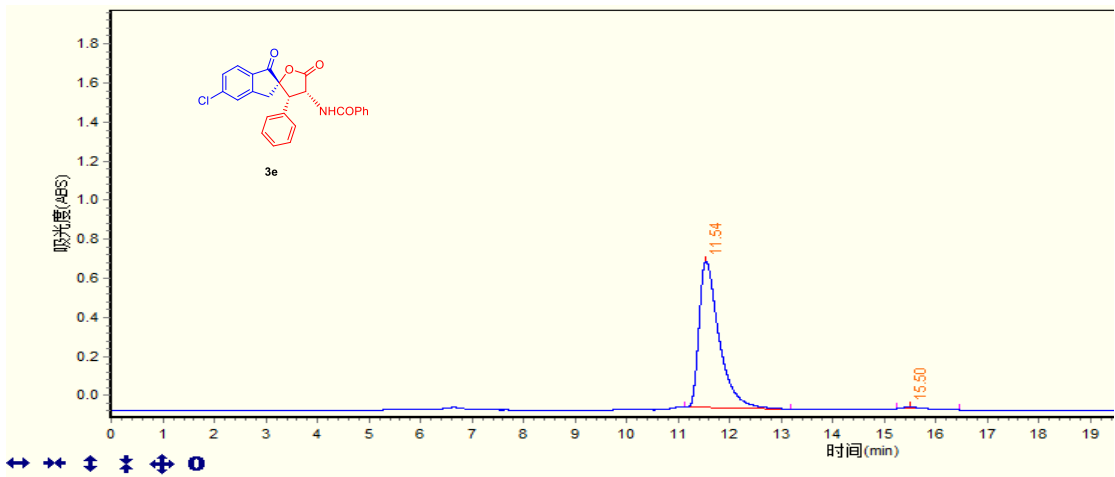

| 序号 | 保留时间  | 峰面积        | 峰高      | 面积百分比   | 峰宽    | 峰类型 |
|----|-------|------------|---------|---------|-------|-----|
| 1  | 11.54 | 10019761   | 373700  | 98.81%  | 2.057 | BB  |
| 2  | 15.50 | 120906     | 4530    | 1.19%   | 1.217 | BB  |
| 总计 |       | 10,140,667 | 378,230 | 100.00% |       |     |

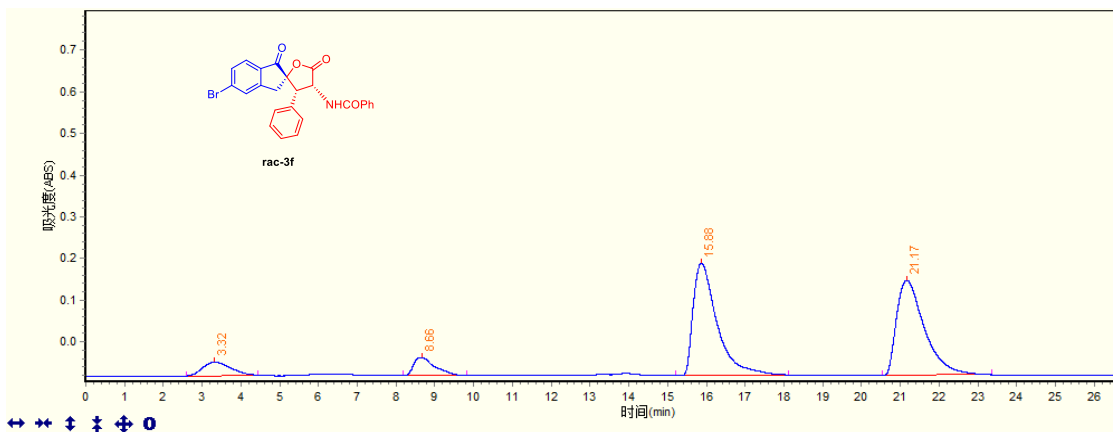

| 序号 | 保留时间  | 峰面积        | 峰高      | 面积百分比   | 峰宽    | 峰类型 |
|----|-------|------------|---------|---------|-------|-----|
| 1  | 3.32  | 796050     | 15969   | 6.09%   | 1.832 | BB  |
| 2  | 8.66  | 805306     | 21530   | 6.16%   | 1.625 | BB  |
| 3  | 15.88 | 5764145    | 134818  | 44.07%  | 2.903 | BB  |
| 4  | 21.17 | 5713296    | 114096  | 43.68%  | 2.834 | BB  |
| 总计 |       | 13,078,797 | 286,413 | 100.00% |       |     |

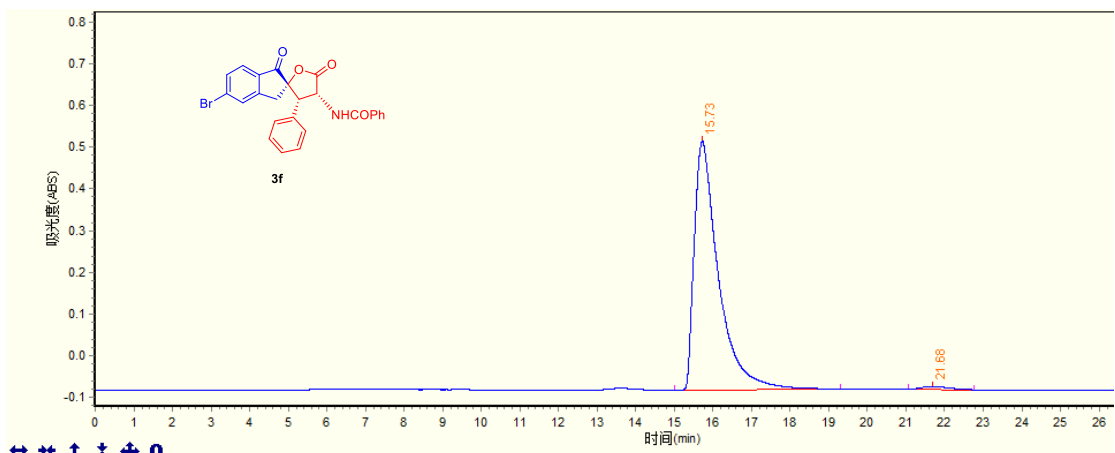

| 序号 | 保留时间  | 峰面积        | 峰高      | 面积百分比   | 峰宽    | 峰类型 |
|----|-------|------------|---------|---------|-------|-----|
| 1  | 15.73 | 12925032   | 297827  | 98.56%  | 4.296 | BB  |
| 2  | 21.68 | 189270     | 3894    | 1.44%   | 1.718 | BB  |
| 总计 |       | 13,114,302 | 301,721 | 100.00% |       |     |

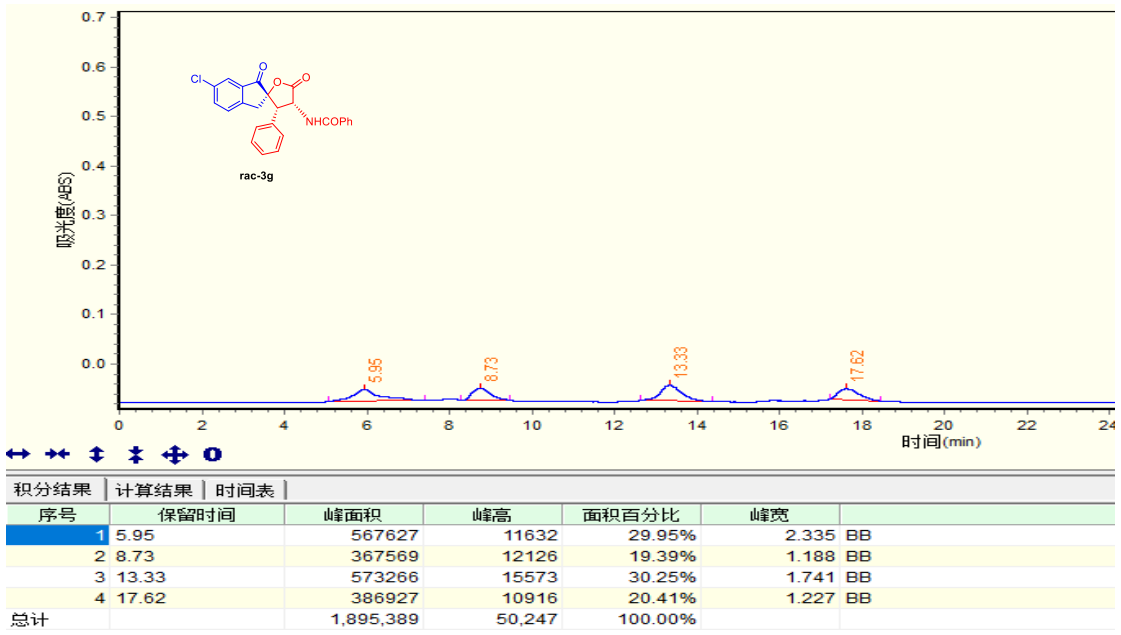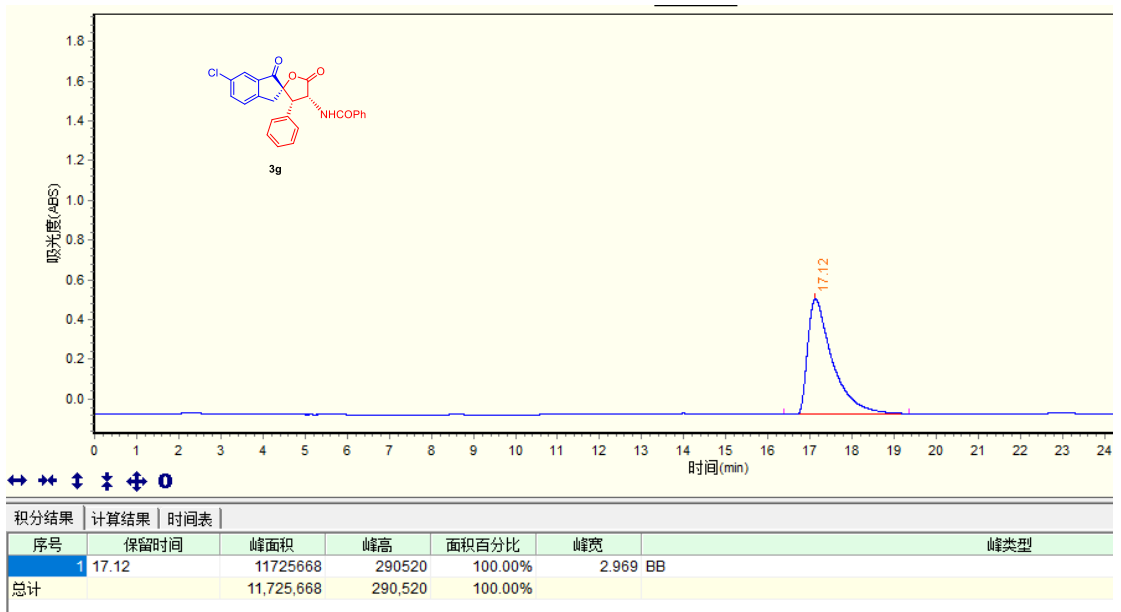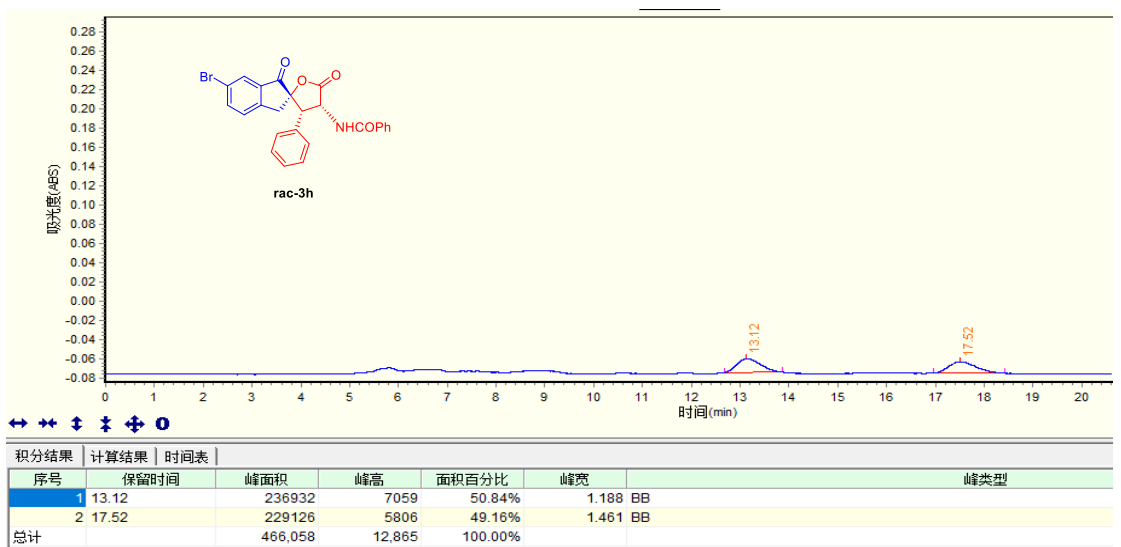

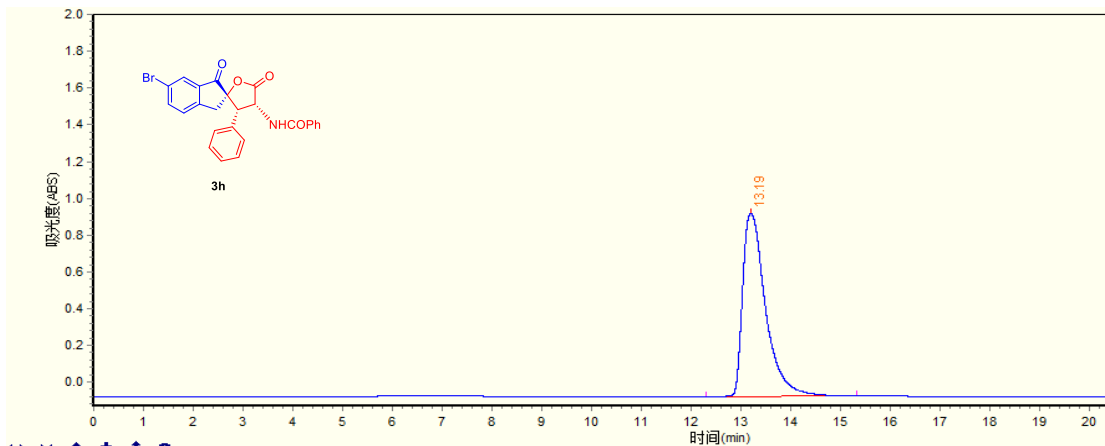

| 序号 | 保留时间  | 峰面积        | 峰高      | 面积百分比   | 峰宽    | 峰类型 |
|----|-------|------------|---------|---------|-------|-----|
| 1  | 13.19 | 15952700   | 497708  | 100.00% | 3.023 | BB  |
| 总计 |       | 15,952,700 | 497,708 | 100.00% |       |     |

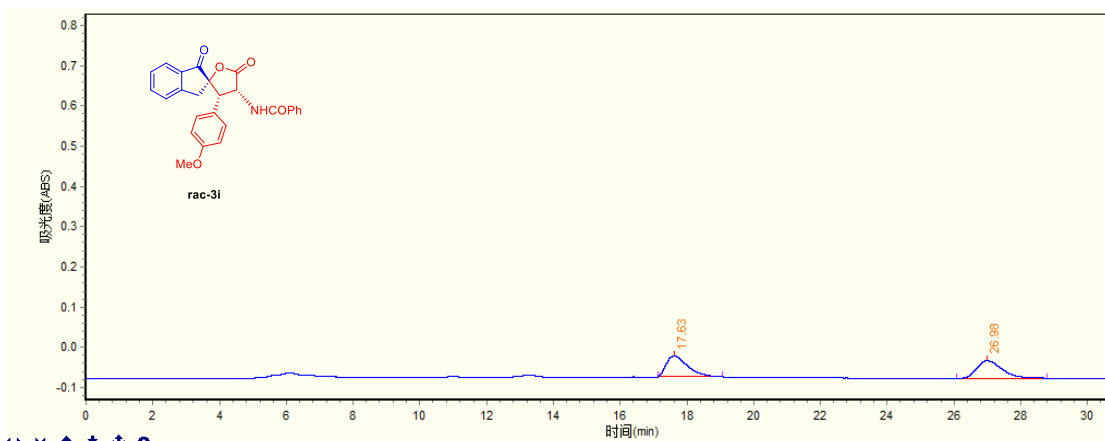

| 序号 | 保留时间  | 峰面积       | 峰高     | 面积百分比   | 峰宽    | 峰类型 |
|----|-------|-----------|--------|---------|-------|-----|
| 1  | 17.63 | 1152897   | 25861  | 50.57%  | 1.926 | BB  |
| 2  | 26.98 | 1126885   | 21725  | 49.43%  | 2.709 | BB  |
| 总计 |       | 2,279,782 | 47,586 | 100.00% |       |     |

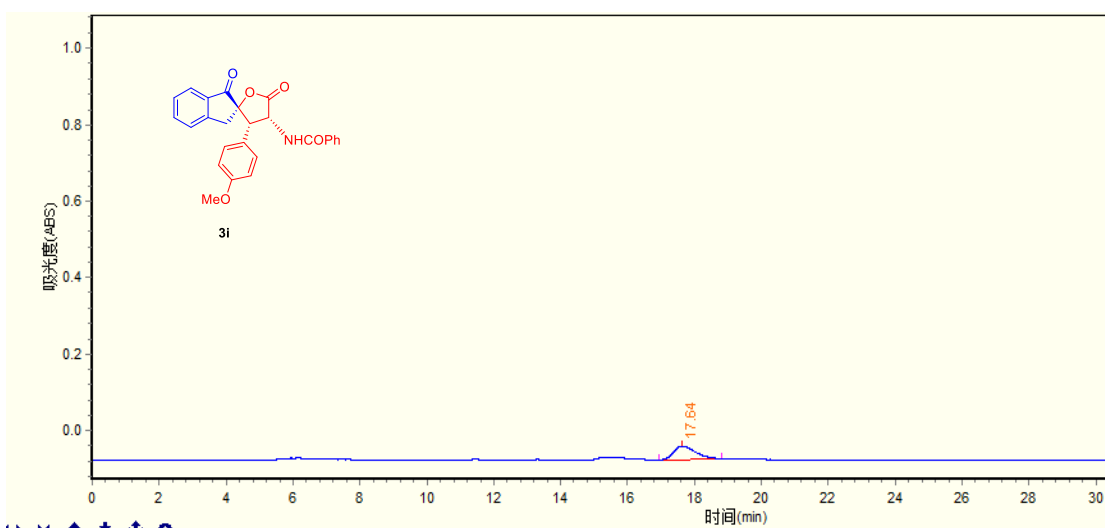

| 序号 | 保留时间  | 峰面积     | 峰高     | 面积百分比   | 峰宽    | 峰类型 |
|----|-------|---------|--------|---------|-------|-----|
| 1  | 17.64 | 770497  | 17383  | 100.00% | 1.873 | BB  |
| 总计 |       | 770,497 | 17,383 | 100.00% |       |     |



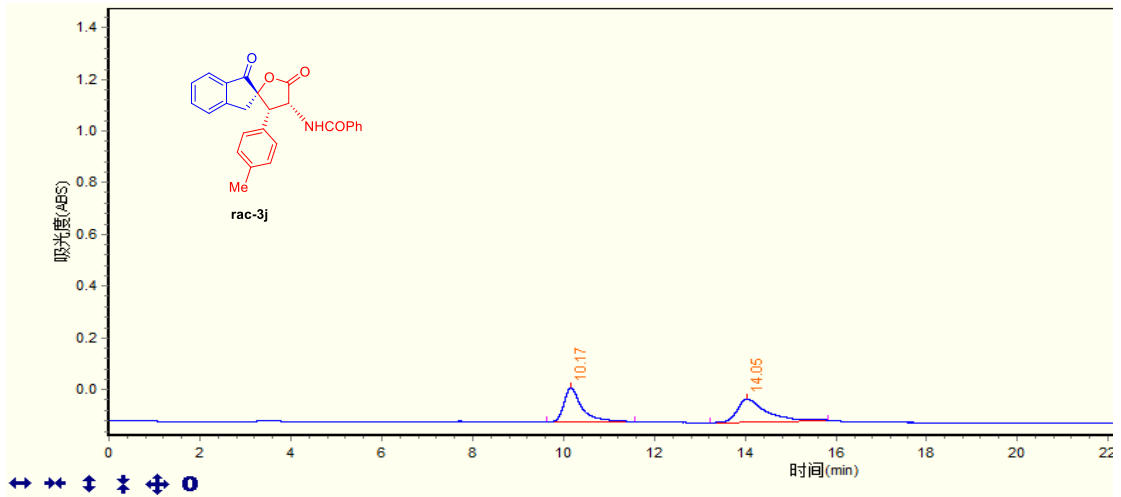

| 序号 | 保留时间  | 峰面积       | 峰高      | 面积百分比   | 峰宽    | 峰类型 |
|----|-------|-----------|---------|---------|-------|-----|
| 1  | 10.17 | 1843642   | 66288   | 49.38%  | 1.939 | BB  |
| 2  | 14.05 | 1889967   | 44088   | 50.62%  | 2.596 | BB  |
| 总计 |       | 3,733,609 | 110,376 | 100.00% |       |     |

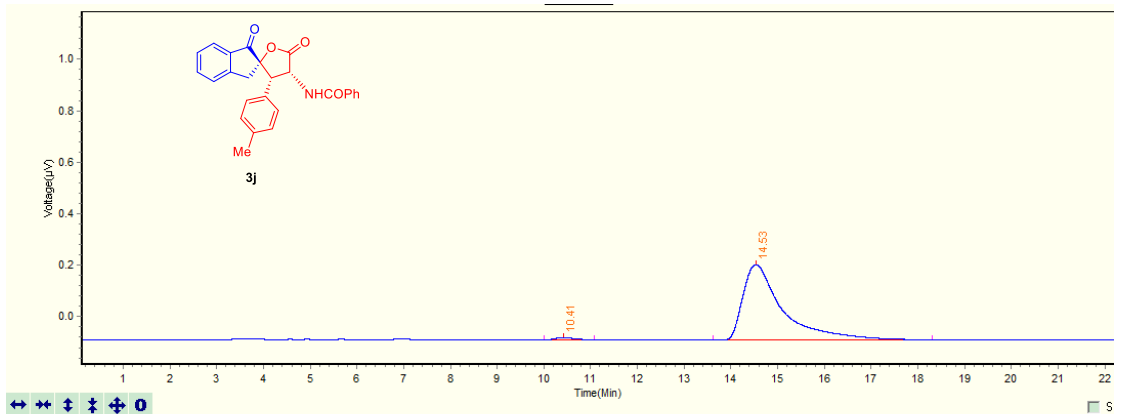

| No.   | Retention Time | Peak Area | Peak Height | Peak Area(%) | Peak Width | Peak Type |
|-------|----------------|-----------|-------------|--------------|------------|-----------|
| 1     | 10.41          | 127951    | 4675        | 1.45%        | 1.083      | BB        |
| 2     | 14.53          | 8667621   | 146881      | 98.55%       | 4.68       | BB        |
| Total |                | 8,795,572 | 151,556     | 100.00%      |            |           |

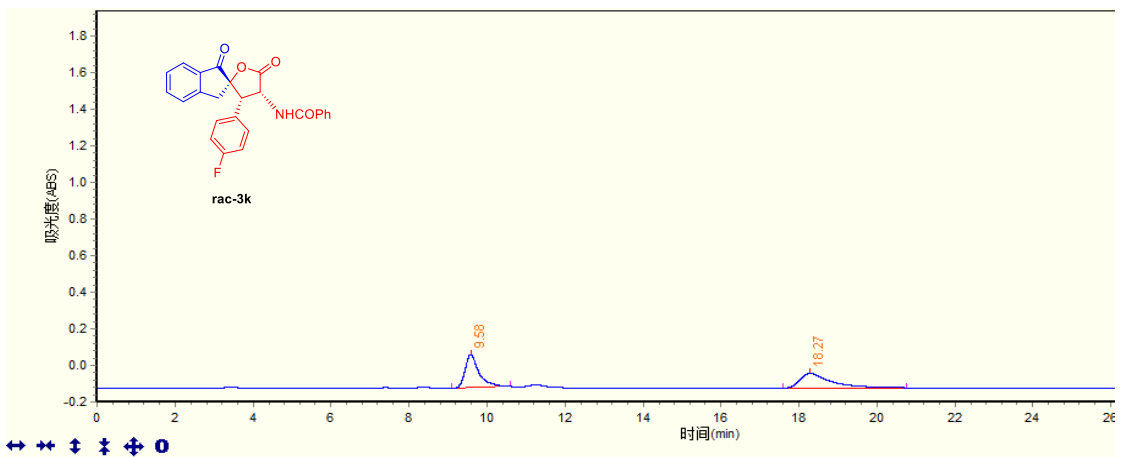

| 序号 | 保留时间  | 峰面积       | 峰高      | 面积百分比   | 峰宽    | 峰类型 |
|----|-------|-----------|---------|---------|-------|-----|
| 1  | 9.58  | 2242969   | 90382   | 50.09%  | 1.505 | BB  |
| 2  | 18.27 | 2234804   | 39898   | 49.91%  | 3.167 | BB  |
| 总计 |       | 4,477,773 | 130,280 | 100.00% |       |     |

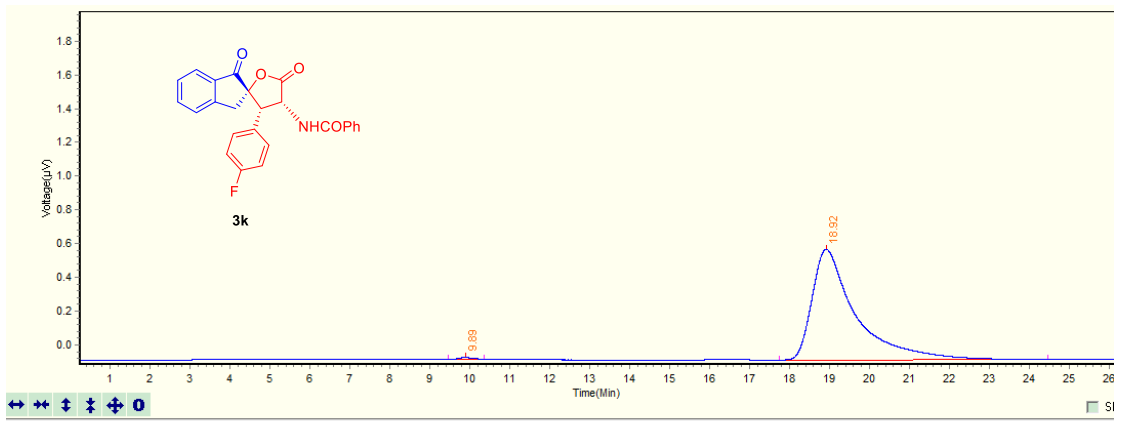

| No.   | Retention Time | Peak Area  | Peak Height | Peak Area(%) | Peak Width | Peak Type |
|-------|----------------|------------|-------------|--------------|------------|-----------|
| 1     | 9.89           | 148592     | 5741        | 0.59%        | 0.911      | BB        |
| 2     | 18.92          | 24853107   | 328203      | 99.41%       | 6.722      | BB        |
| Total |                | 25,001,699 | 333,944     | 100.00%      |            |           |

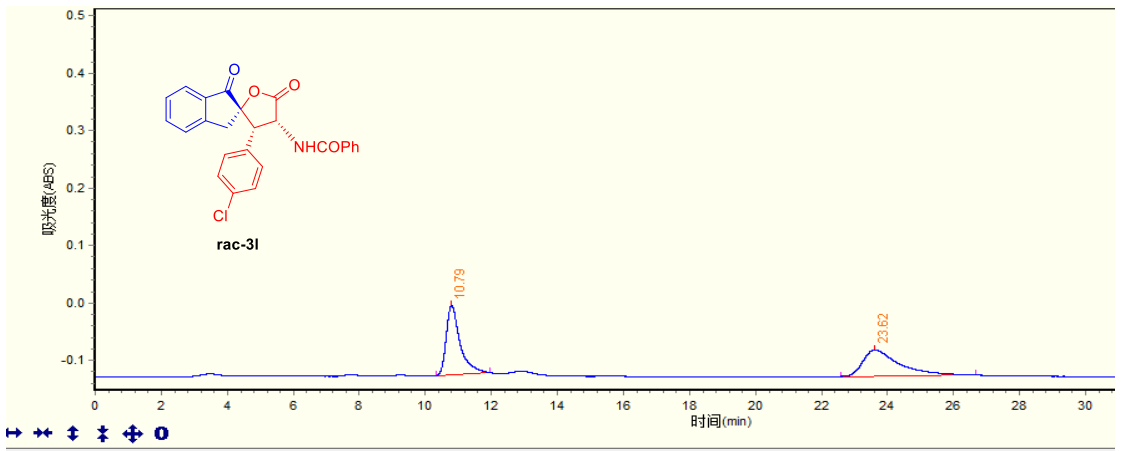

| 序号 | 保留时间  | 峰面积       | 峰高     | 面积百分比   | 峰宽    | 峰类型 |
|----|-------|-----------|--------|---------|-------|-----|
| 1  | 10.79 | 1753703   | 60696  | 50.17%  | 1.62  | BB  |
| 2  | 23.62 | 1741905   | 22798  | 49.83%  | 4.086 | BB  |
| 总计 |       | 3,495,608 | 83,494 | 100.00% |       |     |

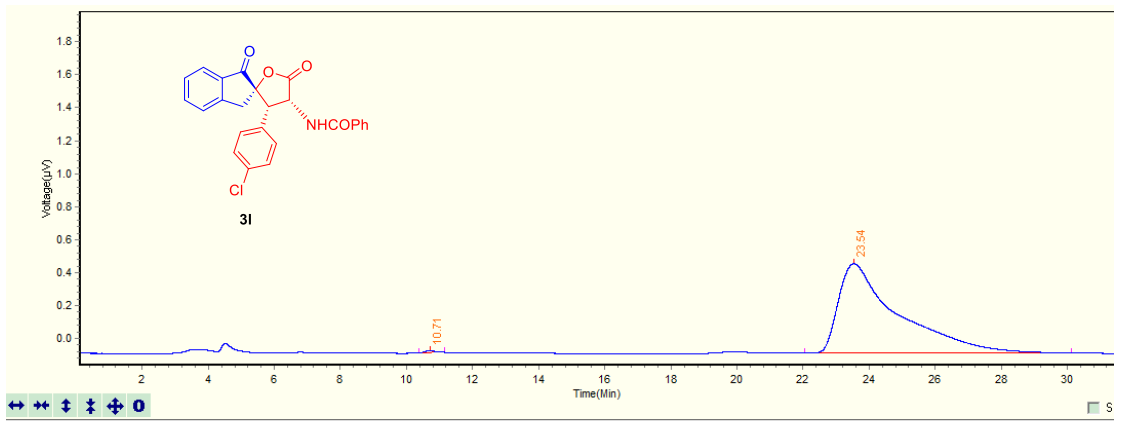

| No.   | Retention Time | Peak Area  | Peak Height | Peak Area(%) | Peak Width | Peak Type |
|-------|----------------|------------|-------------|--------------|------------|-----------|
| 1     | 10.71          | 129008     | 5375        | 0.38%        | 0.781      | BB        |
| 2     | 23.54          | 33810250   | 270299      | 99.62%       | 8.069      | BB        |
| Total |                | 33,939,258 | 275,674     | 100.00%      |            |           |

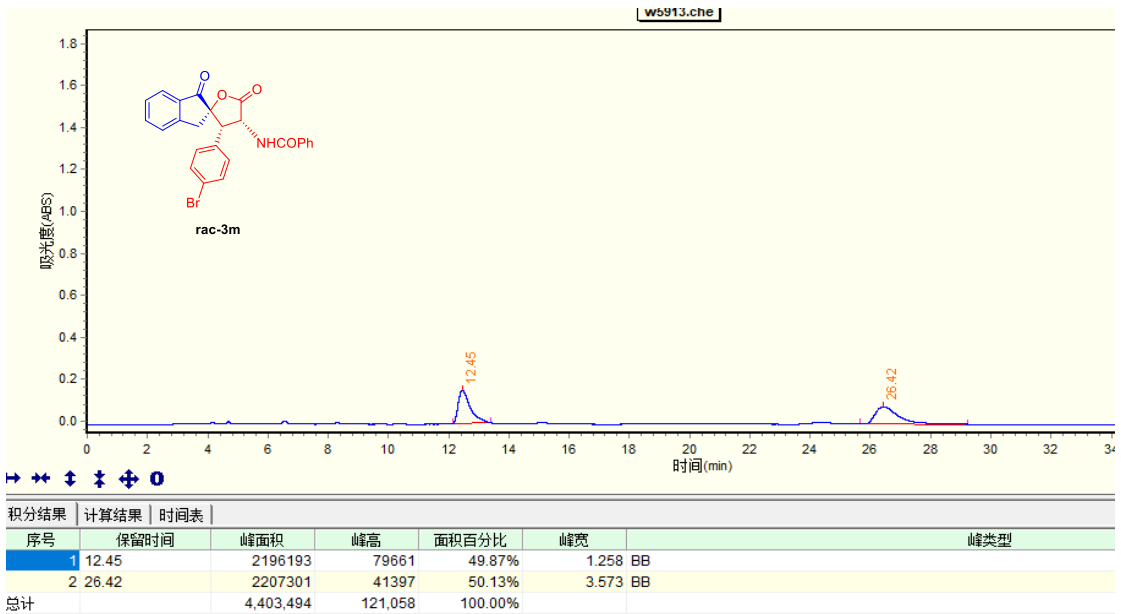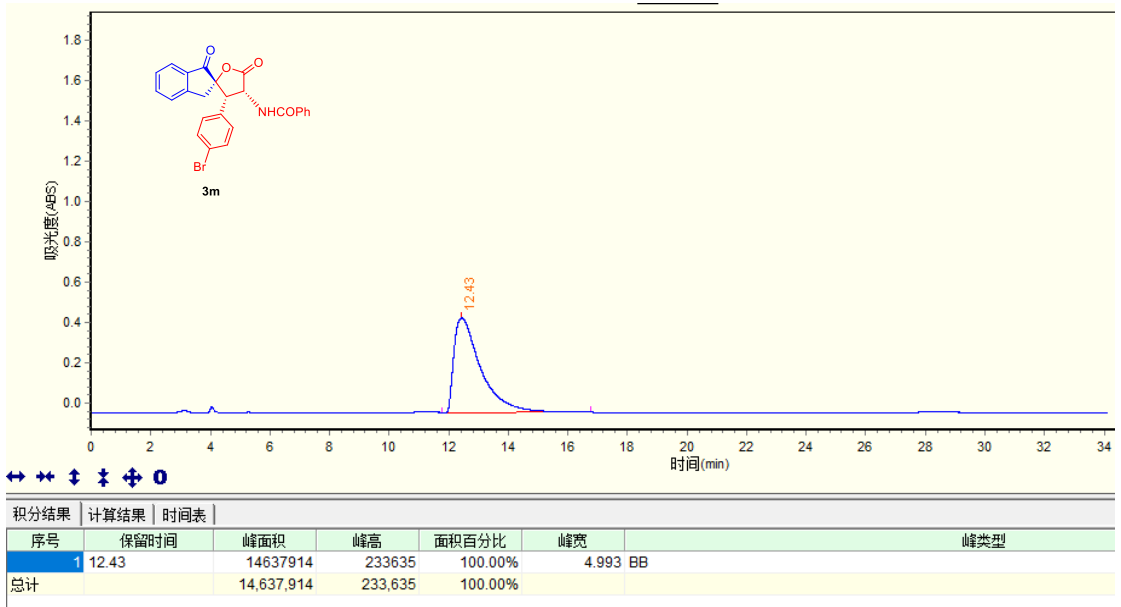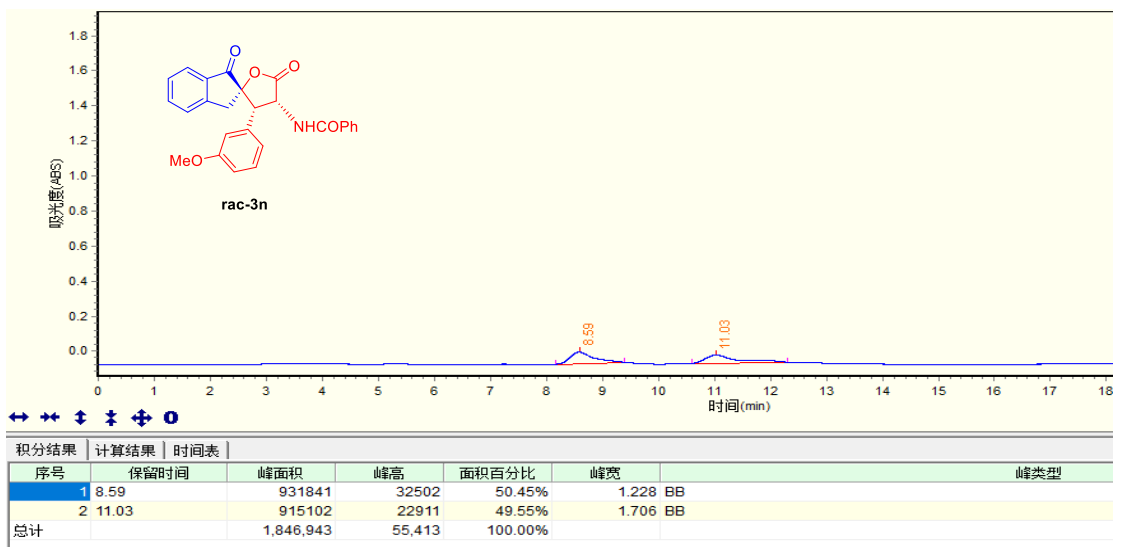

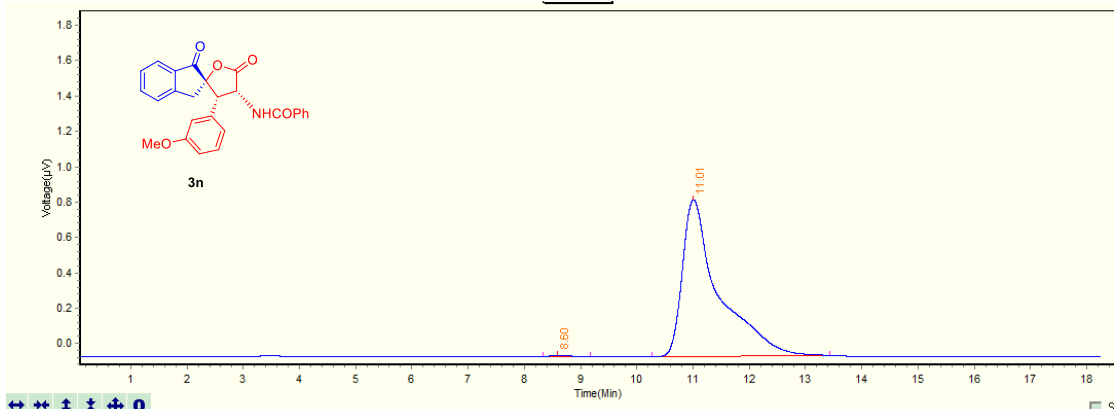

| No.   | Retention Time | Peak Area  | Peak Height | Peak Area(%) | Peak Width | Peak Type |
|-------|----------------|------------|-------------|--------------|------------|-----------|
| 1     | 8.60           | 73877      | 3139        | 0.37%        | 0.85       | BB        |
| 2     | 11.01          | 19929655   | 442694      | 99.63%       | 3.162      | BB        |
| Total |                | 20,003,532 | 445,833     | 100.00%      |            |           |

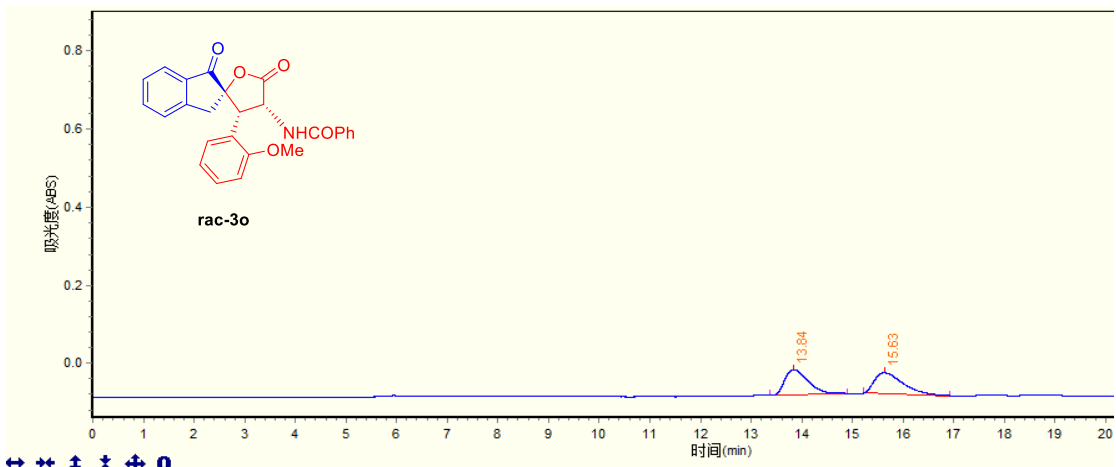

| 序号 | 保留时间  | 峰面积       | 峰高     | 面积百分比   | 峰宽    | 峰类型 |
|----|-------|-----------|--------|---------|-------|-----|
| 1  | 13.84 | 1014846   | 31949  | 49.08%  | 1.509 | BB  |
| 2  | 15.63 | 1052835   | 26788  | 50.92%  | 1.717 | BB  |
| 总计 |       | 2,067,681 | 58,737 | 100.00% |       |     |

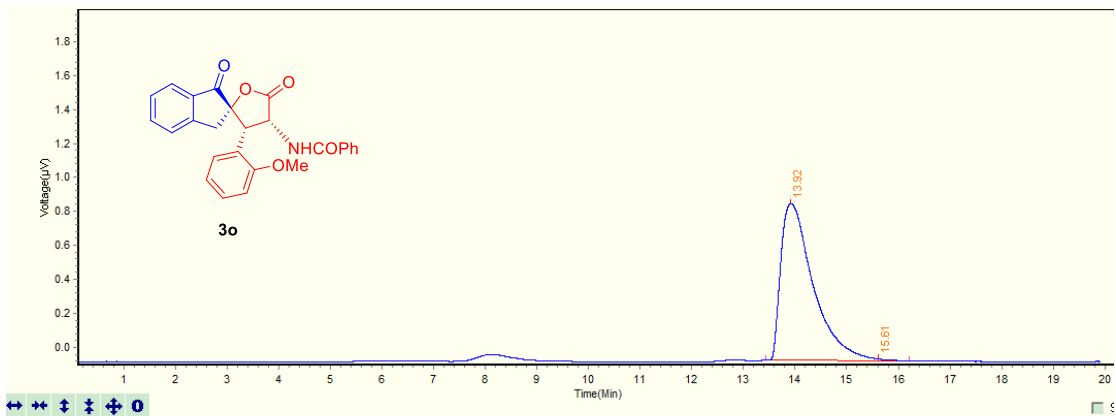

| No.   | Retention Time | Peak Area  | Peak Height | Peak Area(%) | Peak Width | Peak Type |
|-------|----------------|------------|-------------|--------------|------------|-----------|
| 1     | 13.92          | 20060904   | 460877      | 99.74%       | 2.179      | BV        |
| 2     | 15.61          | 52402      | 4588        | 0.26%        | 0.599      | VB        |
| Total |                | 20,113,306 | 465,465     | 100.00%      |            |           |

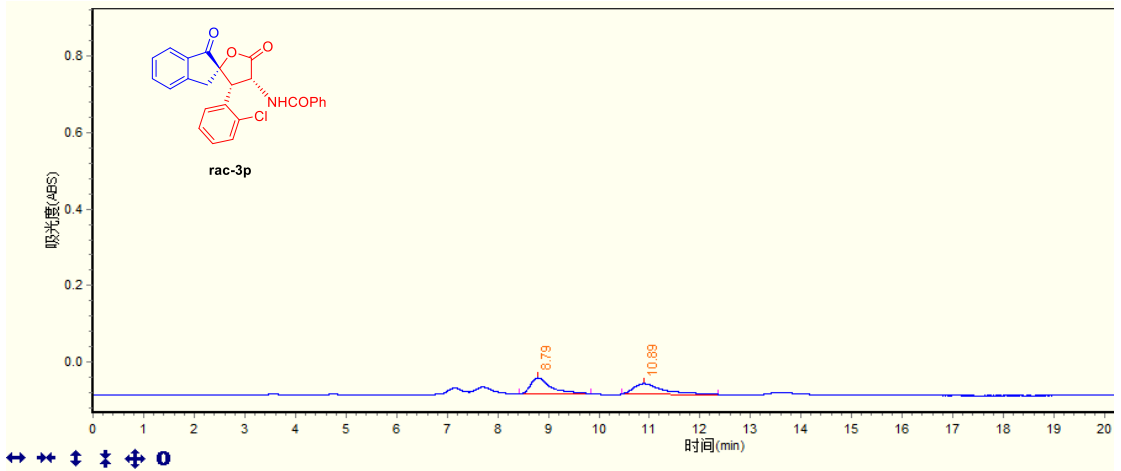

| 序号 | 保留时间  | 峰面积       | 峰高     | 面积百分比   | 峰宽    | 峰类型 |
|----|-------|-----------|--------|---------|-------|-----|
| 1  | 8.79  | 579688    | 21022  | 50.83%  | 1.417 | BB  |
| 2  | 10.89 | 560661    | 13741  | 49.17%  | 1.905 | BB  |
| 总计 |       | 1,140,349 | 34,763 | 100.00% |       |     |

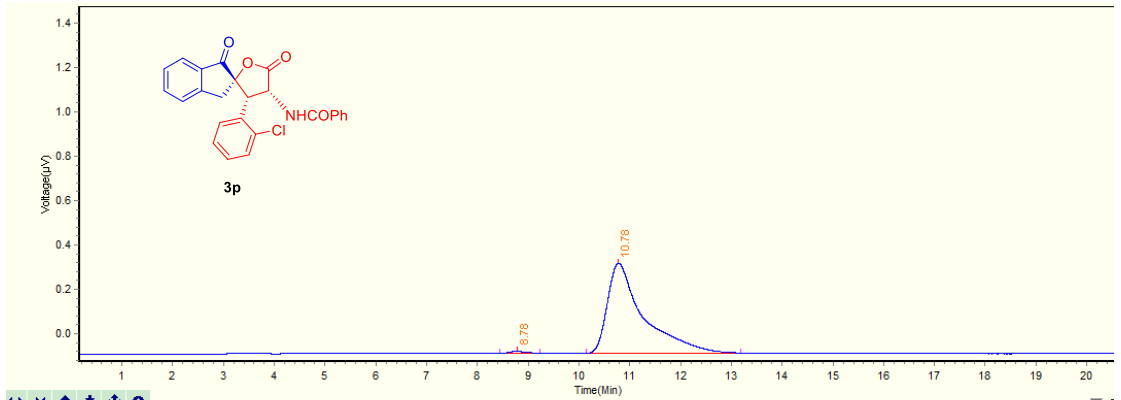

| No.   | Retention Time | Peak Area  | Peak Height | Peak Area(%) | Peak Width | Peak Type |
|-------|----------------|------------|-------------|--------------|------------|-----------|
| 1     | 8.78           | 99349      | 4522        | 0.99%        | 0.798      | BB        |
| 2     | 10.78          | 9968623    | 202901      | 99.01%       | 3.049      | BB        |
| Total |                | 10,067,972 | 207,423     | 100.00%      |            |           |

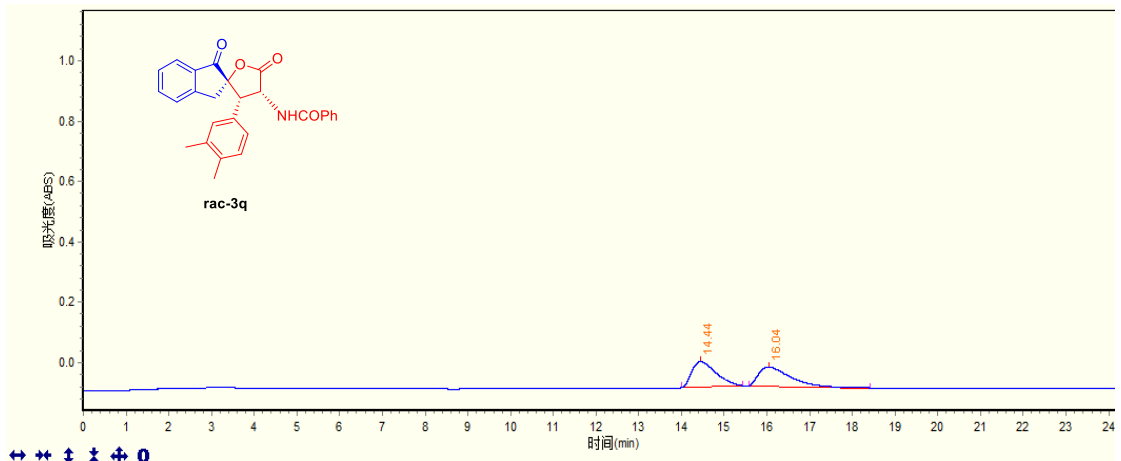

| 序号 | 保留时间  | 峰面积       | 峰高     | 面积百分比   | 峰宽    | 峰类型 |
|----|-------|-----------|--------|---------|-------|-----|
| 1  | 14.44 | 1661195   | 42347  | 50.81%  | 1.429 | BB  |
| 2  | 16.04 | 1608480   | 31736  | 49.19%  | 2.835 | BB  |
| 总计 |       | 3,269,675 | 74,083 | 100.00% |       |     |

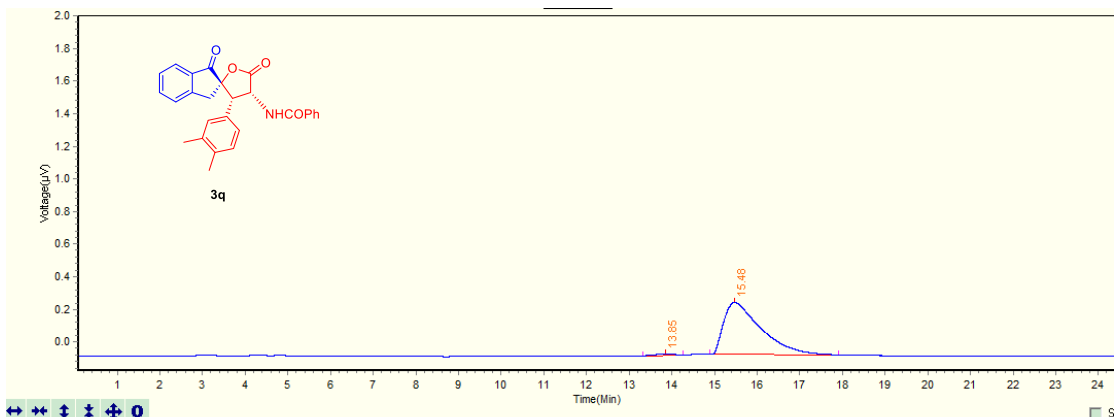

| No.   | Retention Time | Peak Area | Peak Height | Peak Area(%) | Peak Width | Peak Type |
|-------|----------------|-----------|-------------|--------------|------------|-----------|
| 1     | 13.85          | 118369    | 3865        | 1.21%        | 0.945      | BB        |
| 2     | 15.48          | 9625552   | 158841      | 98.79%       | 3.005      | BB        |
| Total |                | 9,743,921 | 162,706     | 100.00%      |            |           |

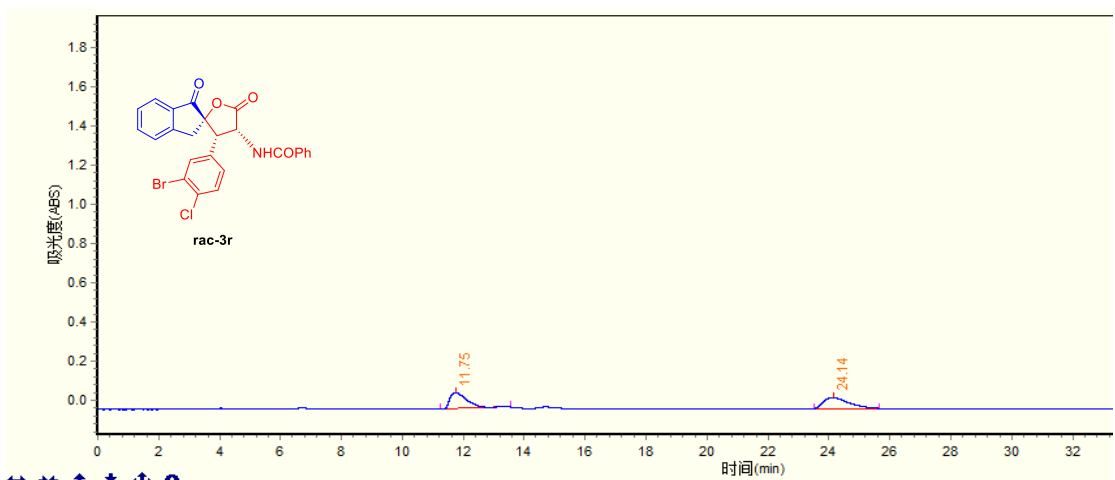

| 序号 | 保留时间  | 峰面积       | 峰高     | 面积百分比   | 峰宽    | 峰类型 |
|----|-------|-----------|--------|---------|-------|-----|
| 1  | 11.75 | 1635138   | 41277  | 50.00%  | 2.308 | BB  |
| 2  | 24.14 | 1635346   | 28097  | 50.00%  | 2.137 | BB  |
| 总计 |       | 3,270,484 | 69,374 | 100.00% |       |     |

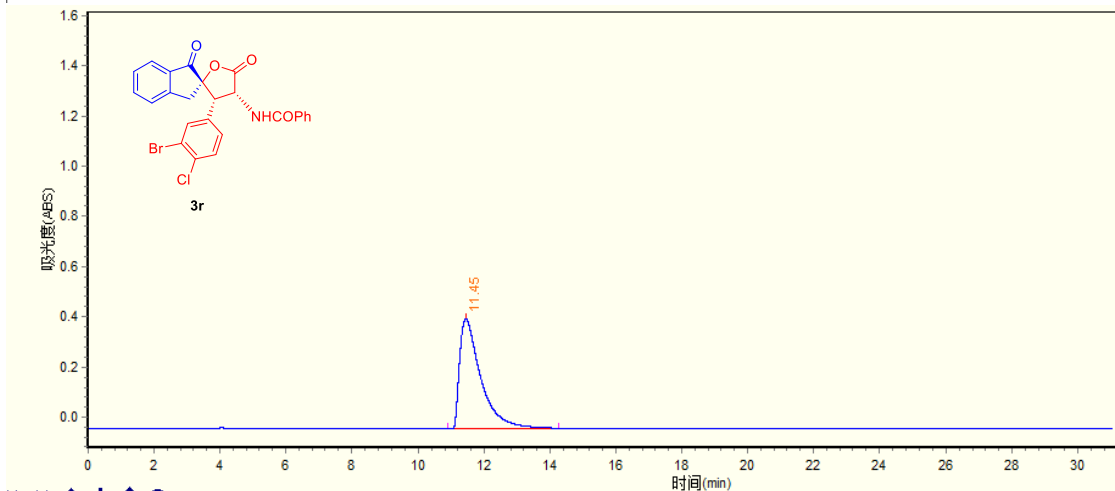

| 序号 | 保留时间  | 峰面积       | 峰高      | 面积百分比   | 峰宽    | 峰类型 |
|----|-------|-----------|---------|---------|-------|-----|
| 1  | 11.45 | 9728754   | 219175  | 100.00% | 3.363 | BB  |
| 总计 |       | 9,728,754 | 219,175 | 100.00% |       |     |

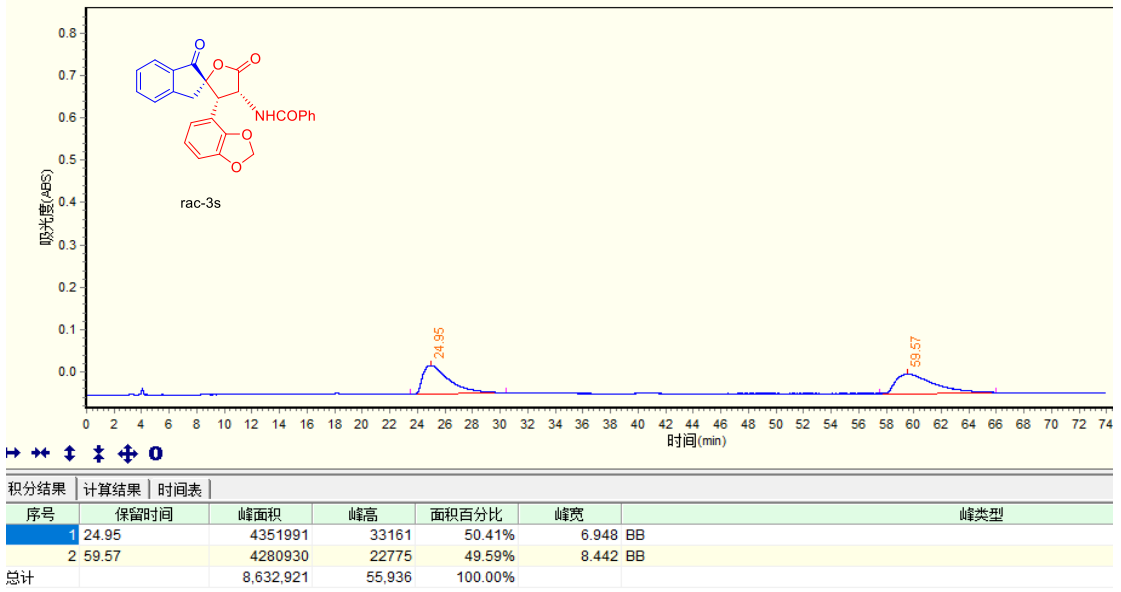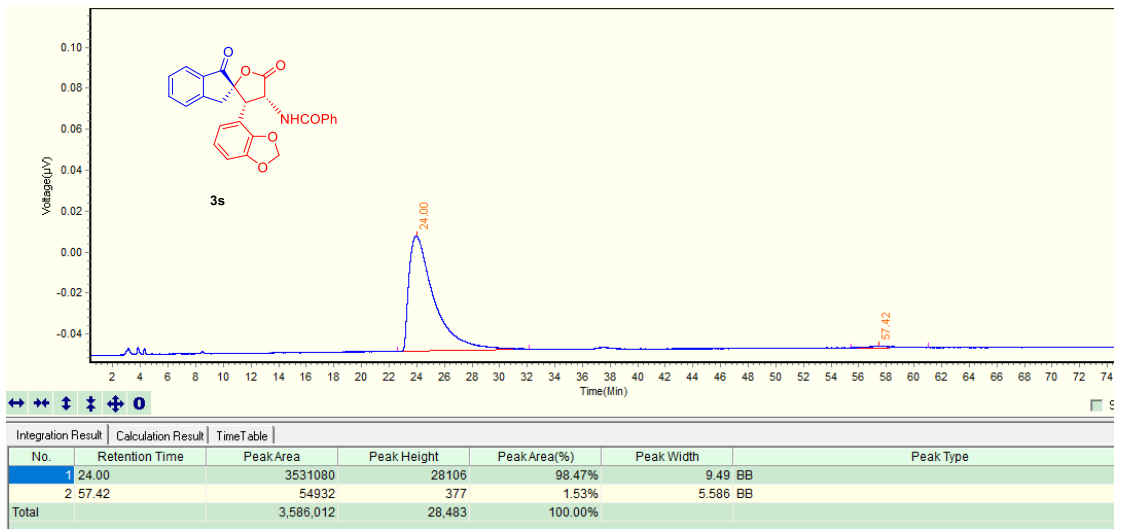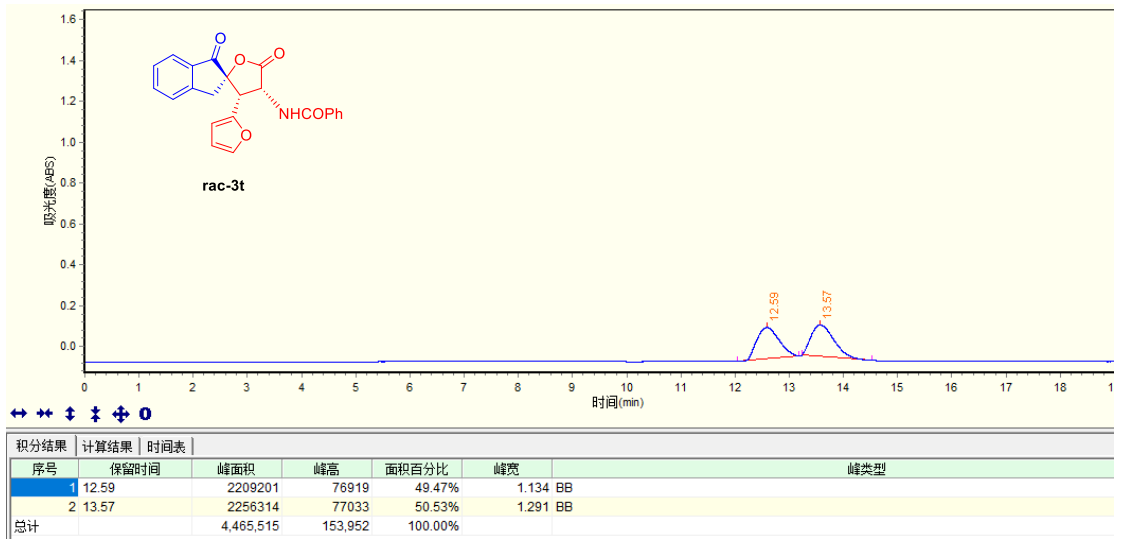

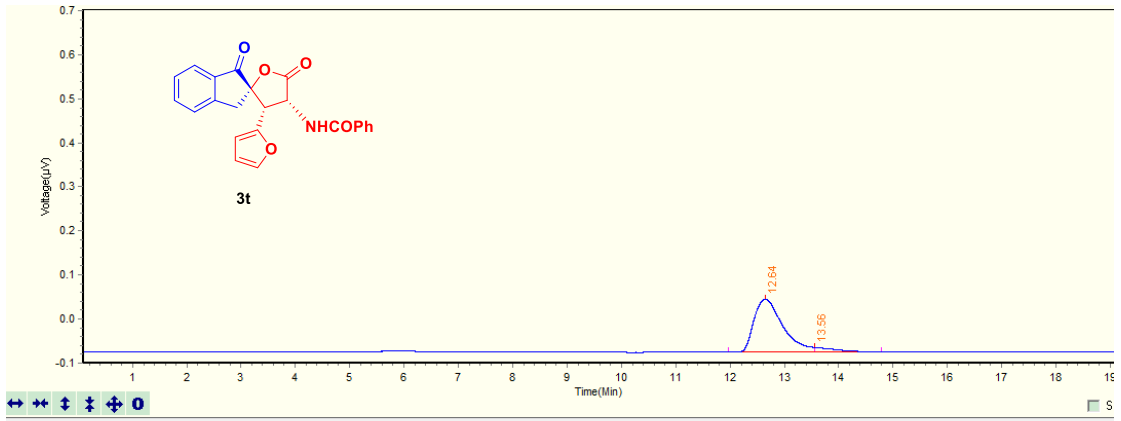

| No.   | Retention Time | PeakArea  | Peak Height | PeakArea(%) | Peak Width | Peak Type |
|-------|----------------|-----------|-------------|-------------|------------|-----------|
| 1     | 12.64          | 2179844   | 59877       | 94.70%      | 1.583 BV   |           |
| 2     | 13.56          | 122054    | 4829        | 5.30%       | 1.229 VB   |           |
| Total |                | 2,301,898 | 64,706      | 100.00%     |            |           |

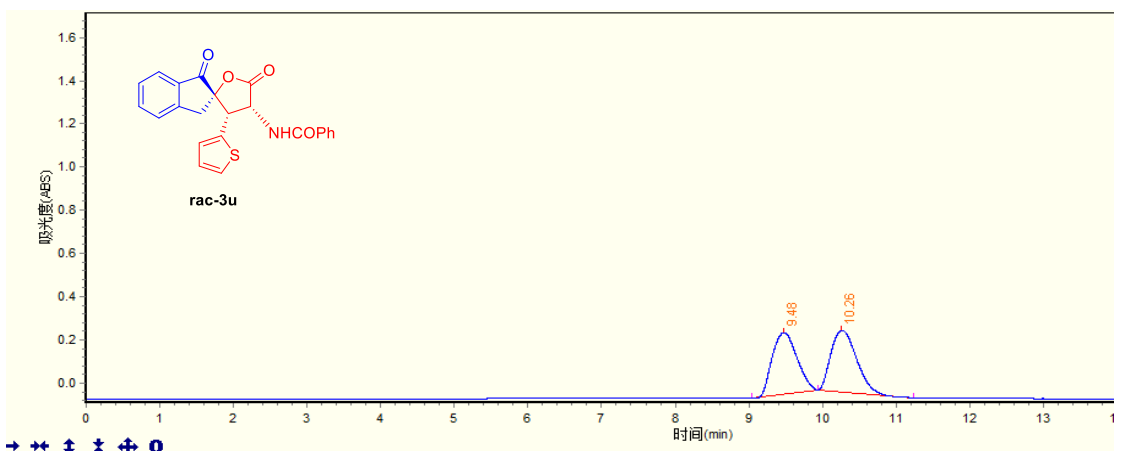

| 序号 | 保留时间  | 峰面积       | 峰高      | 面积百分比   | 峰宽       | 峰类型 |
|----|-------|-----------|---------|---------|----------|-----|
| 1  | 9.48  | 3317397   | 142788  | 49.24%  | 0.898 BB |     |
| 2  | 10.26 | 3419769   | 141783  | 50.76%  | 1.299 BB |     |
| 总计 |       | 6,737,166 | 284,571 | 100.00% |          |     |

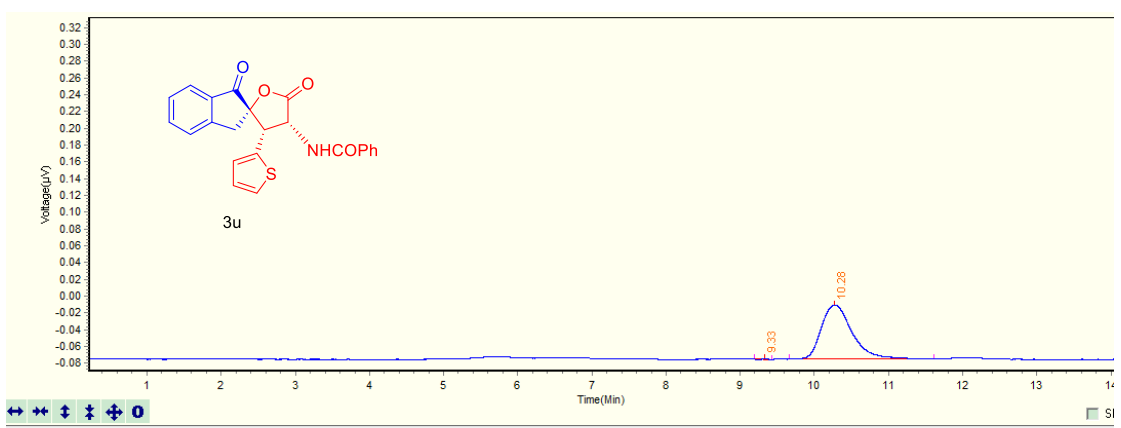

| No.   | Retention Time | PeakArea | Peak Height | PeakArea(%) | Peak Width | Peak Type |
|-------|----------------|----------|-------------|-------------|------------|-----------|
| 1     | 9.33           | 290      | 95          | 0.03%       | 0.231 BB   |           |
| 2     | 10.28          | 932653   | 32153       | 99.97%      | 1.956 BB   |           |
| Total |                | 932,943  | 32,248      | 100.00%     |            |           |



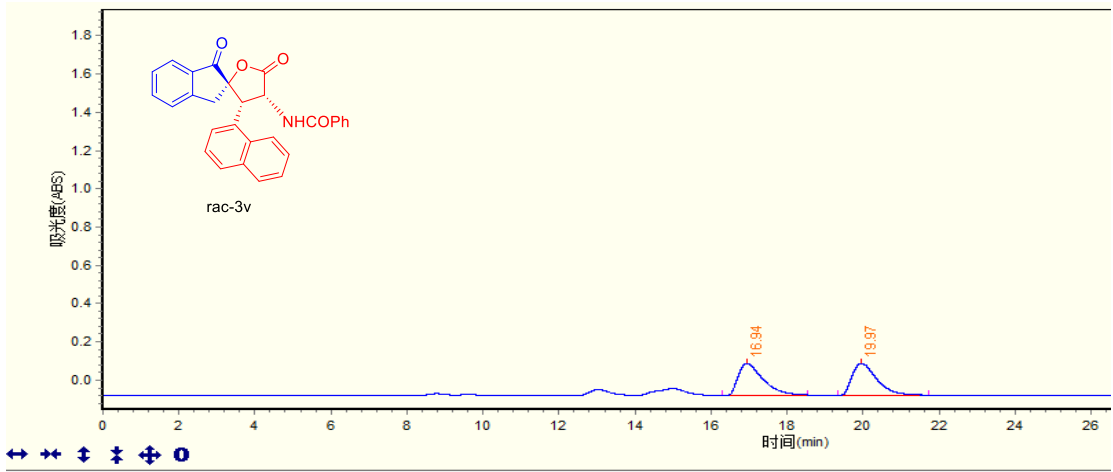

| 序号 | 保留时间  | 峰面积       | 峰高      | 面积百分比   | 峰宽    | 峰  |
|----|-------|-----------|---------|---------|-------|----|
| 1  | 16.94 | 3661532   | 81850   | 49.33%  | 2.245 | BB |
| 2  | 19.97 | 3761735   | 83121   | 50.67%  | 2.39  | BB |
| 总计 |       | 7,423,267 | 164,971 | 100.00% |       |    |

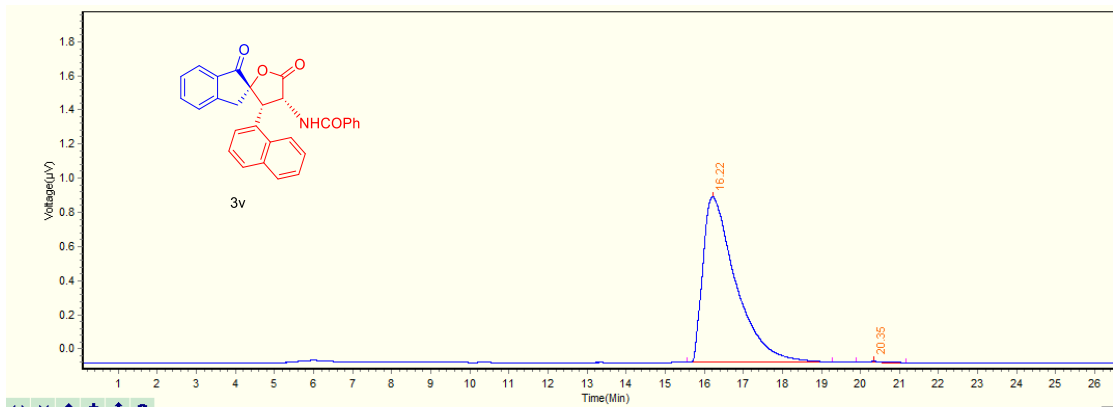

| No.   | Retention Time | Peak Area  | Peak Height | Peak Area(%) | Peak Width | Peak Type |
|-------|----------------|------------|-------------|--------------|------------|-----------|
| 1     | 16.22          | 28189940   | 483047      | 99.57%       | 3.736      | BB        |
| 2     | 20.35          | 121757     | 3088        | 0.43%        | 1.281      | BB        |
| Total |                | 28,311,697 | 486,135     | 100.00%      |            |           |

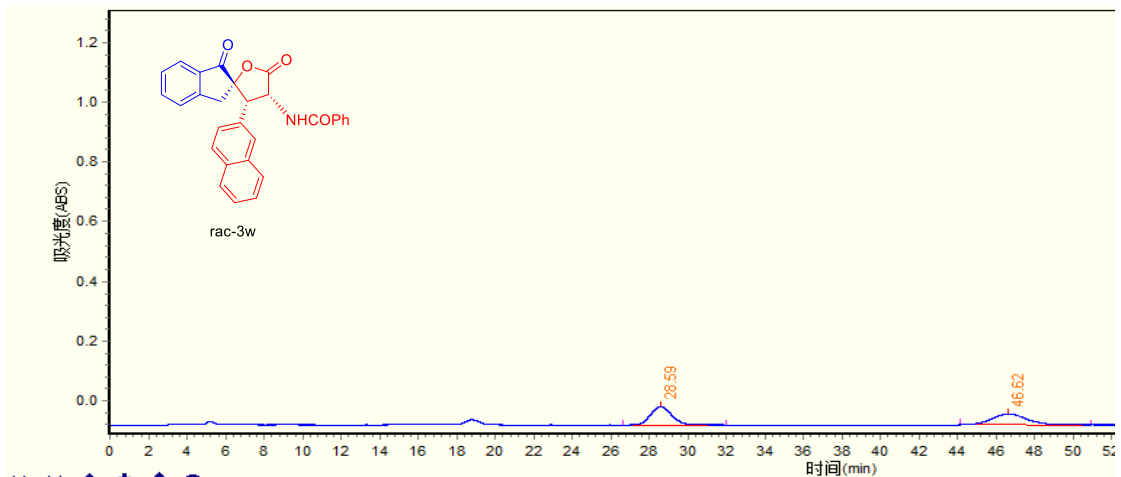

| 序号 | 保留时间  | 峰面积       | 峰高     | 面积百分比   | 峰宽    | 峰  |
|----|-------|-----------|--------|---------|-------|----|
| 1  | 28.59 | 2333347   | 30895  | 50.36%  | 5.358 | BB |
| 2  | 46.62 | 2299797   | 18036  | 49.64%  | 6.792 | BB |
| 总计 |       | 4,633,144 | 48,931 | 100.00% |       |    |

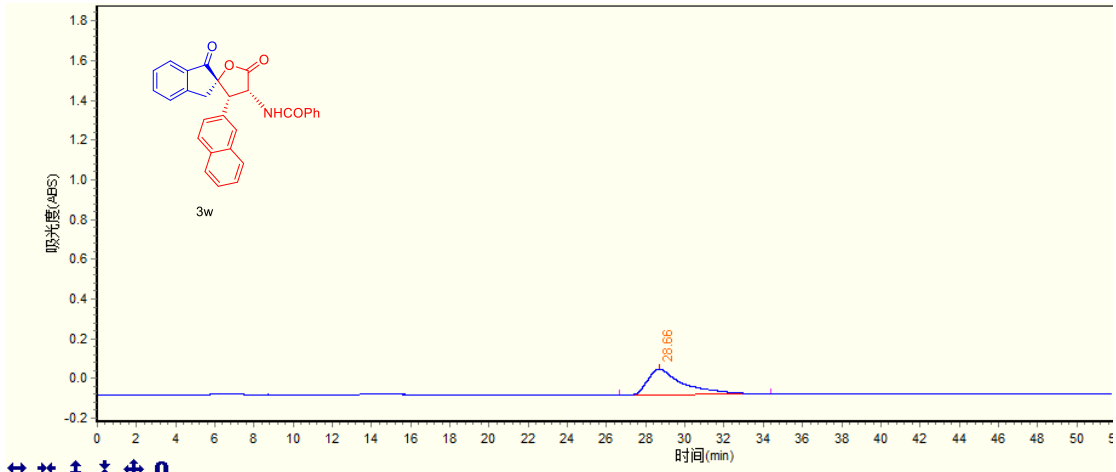

| 序号 | 保留时间  | 峰面积       | 峰高     | 面积百分比   | 峰宽    | 峰类型 |
|----|-------|-----------|--------|---------|-------|-----|
| 1  | 28.66 | 7961476   | 63735  | 100.00% | 7.699 | BB  |
| 总计 |       | 7,961,476 | 63,735 | 100.00% |       |     |

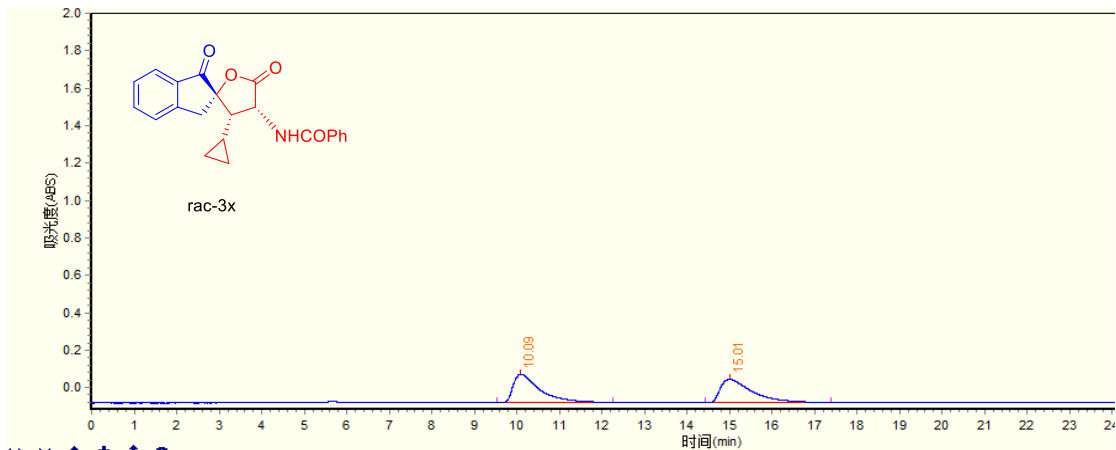

| 序号 | 保留时间  | 峰面积       | 峰高      | 面积百分比   | 峰宽    | 峰类型 |
|----|-------|-----------|---------|---------|-------|-----|
| 1  | 10.09 | 3245519   | 75519   | 49.75%  | 2.705 | BB  |
| 2  | 15.01 | 3278443   | 62852   | 50.25%  | 2.966 | BB  |
| 总计 |       | 6,523,962 | 138,371 | 100.00% |       |     |

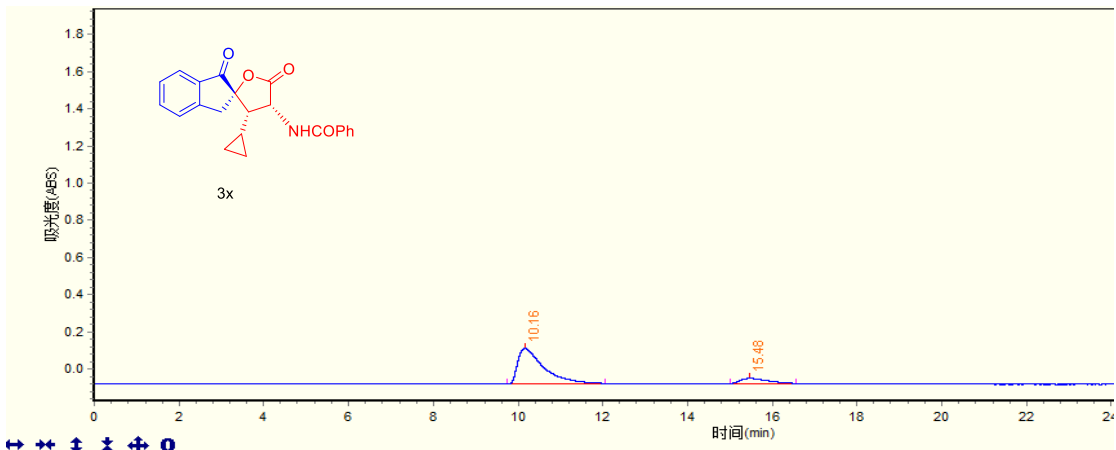

| 序号 | 保留时间  | 峰面积       | 峰高      | 面积百分比   | 峰宽    | 峰类型 |
|----|-------|-----------|---------|---------|-------|-----|
| 1  | 10.16 | 4062677   | 95328   | 86.36%  | 2.313 | BB  |
| 2  | 15.48 | 641799    | 14359   | 13.64%  | 1.552 | BB  |
| 总计 |       | 4,704,476 | 109,687 | 100.00% |       |     |

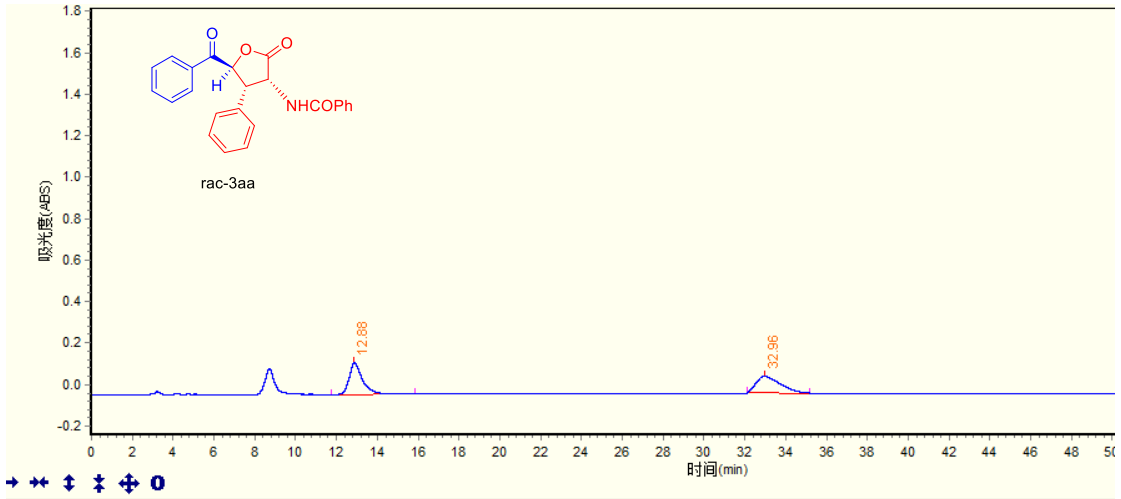

| 序号 | 保留时间  | 峰面积       | 峰高      | 面积百分比   | 峰宽    | 峰类型 |
|----|-------|-----------|---------|---------|-------|-----|
| 1  | 12.88 | 3420363   | 75765   | 50.91%  | 4.098 | BB  |
| 2  | 32.96 | 3297737   | 40247   | 49.09%  | 3.058 | BB  |
| 总计 |       | 6,718,100 | 116,012 | 100.00% |       |     |

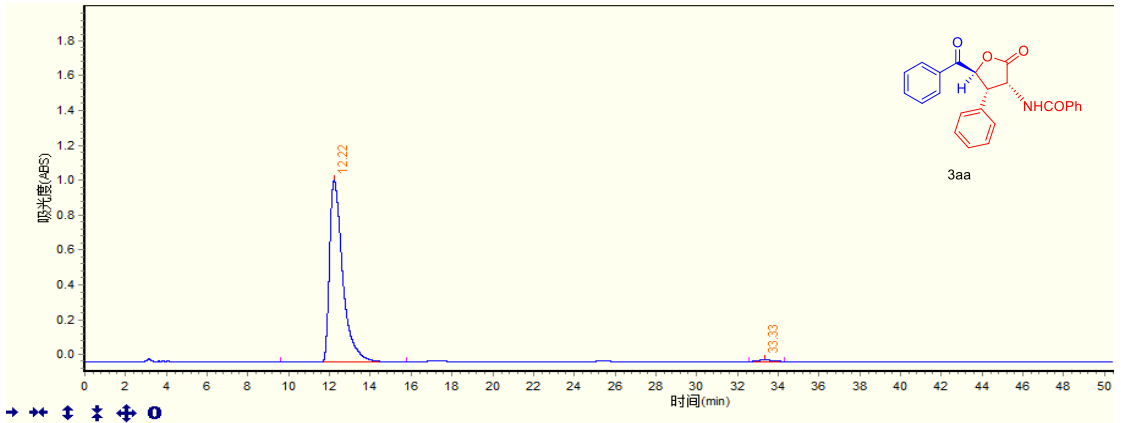

| 序号 | 保留时间  | 峰面积        | 峰高      | 面积百分比   | 峰宽    | 峰类型 |
|----|-------|------------|---------|---------|-------|-----|
| 1  | 12.22 | 23439092   | 521411  | 98.84%  | 6.177 | BB  |
| 2  | 33.33 | 274592     | 4771    | 1.16%   | 1.739 | BB  |
| 总计 |       | 23,713,684 | 526,182 | 100.00% |       |     |

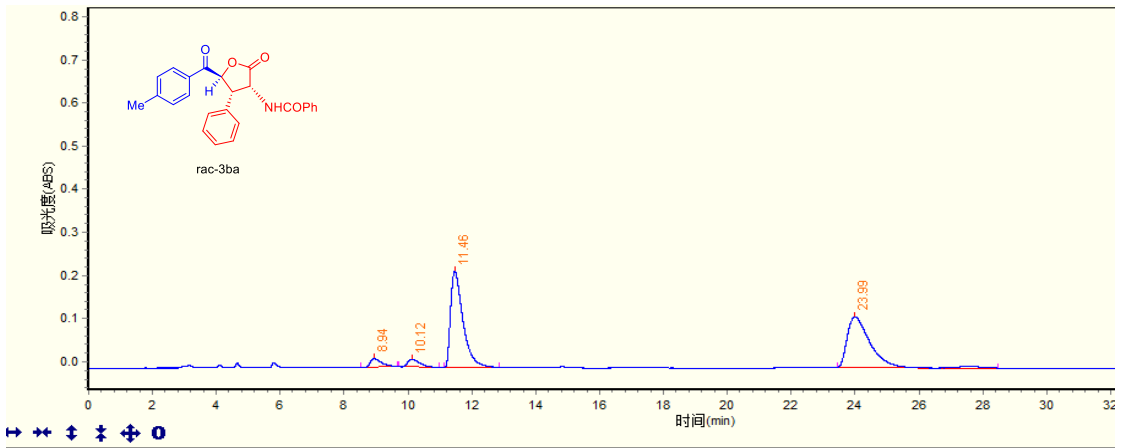

| 序号 | 保留时间  | 峰面积       | 峰高      | 面积百分比   | 峰宽    | 峰类型 |
|----|-------|-----------|---------|---------|-------|-----|
| 1  | 8.94  | 235323    | 9907    | 3.67%   | 1.156 | BB  |
| 2  | 10.12 | 224802    | 8677    | 3.51%   | 1.272 | BB  |
| 3  | 11.46 | 3000157   | 111223  | 46.83%  | 1.733 | BB  |
| 4  | 23.99 | 2946760   | 58623   | 45.99%  | 5.027 | BB  |
| 总计 |       | 6,407,042 | 188,430 | 100.00% |       |     |

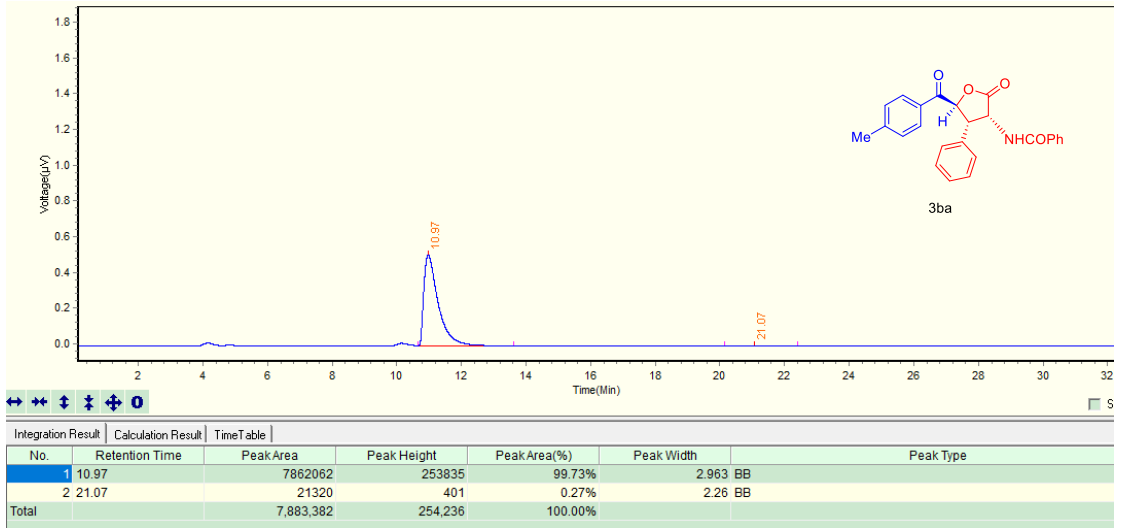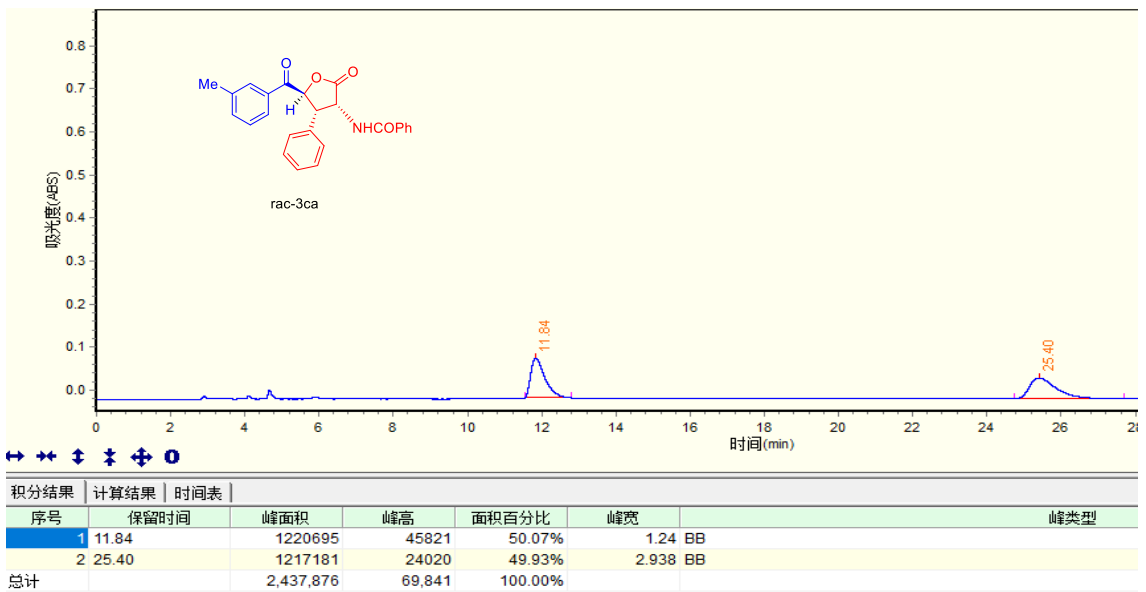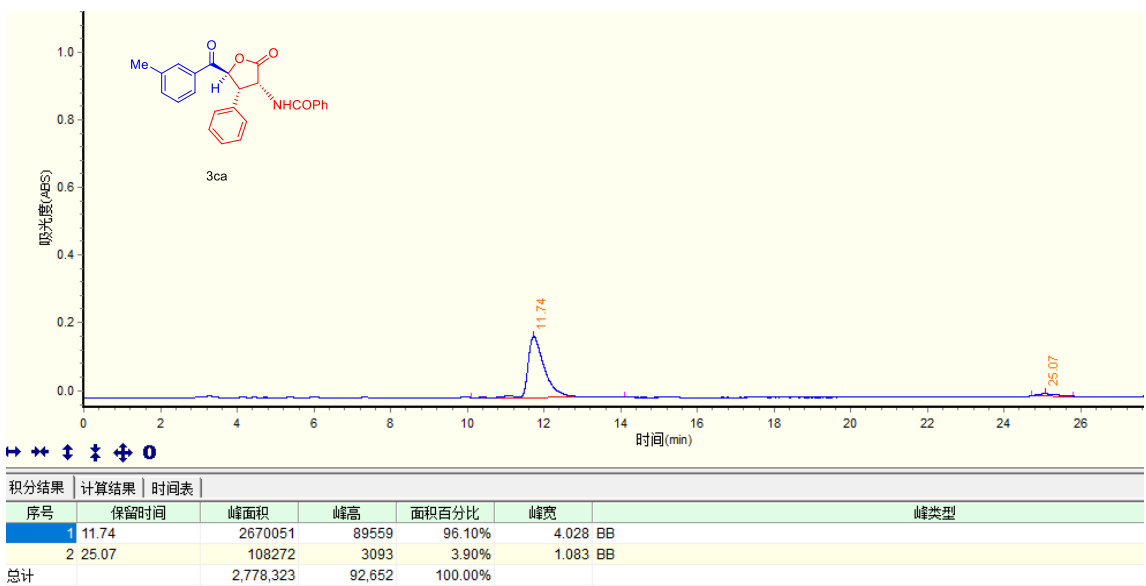

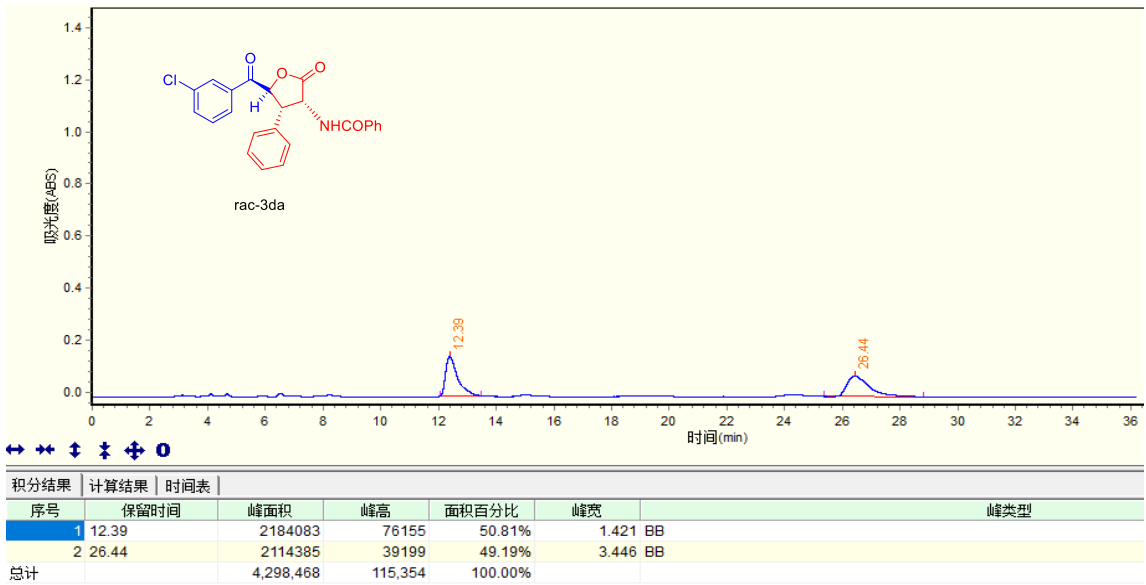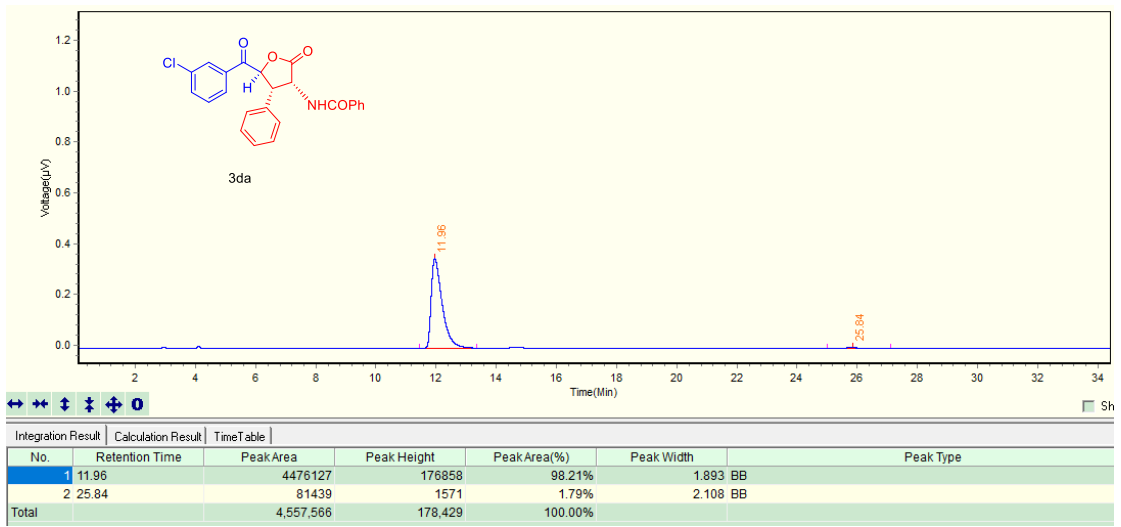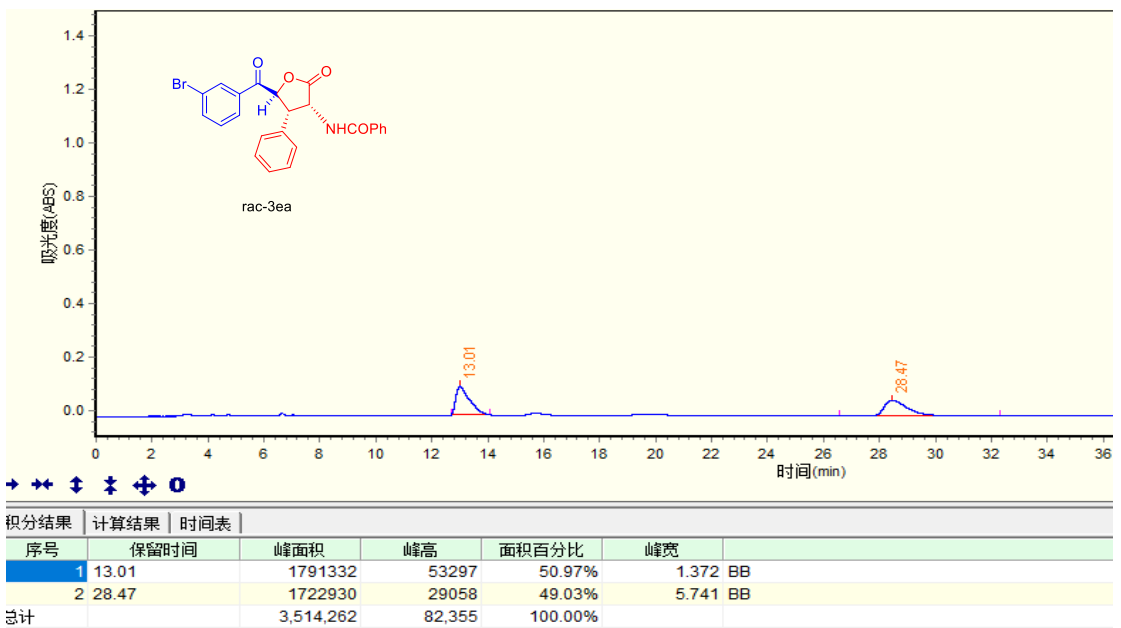

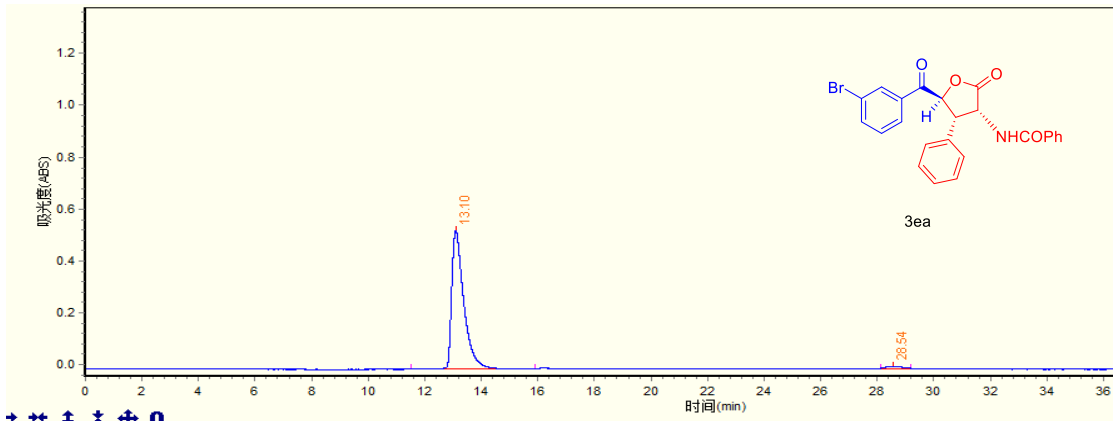

| 序号 | 保留时间  | 峰面积       | 峰高      | 面积百分比   | 峰宽    | 峰类型 |
|----|-------|-----------|---------|---------|-------|-----|
| 1  | 13.10 | 7899784   | 266278  | 98.31%  | 4.384 | BB  |
| 2  | 28.54 | 136197    | 3694    | 1.69%   | 1.063 | BB  |
| 总计 |       | 8,035,981 | 269,972 | 100.00% |       |     |

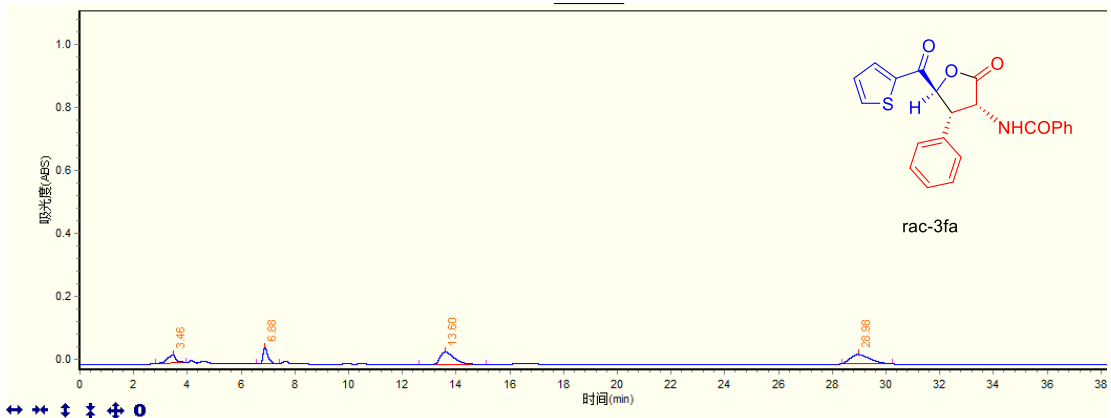

| 序号 | 保留时间  | 峰面积       | 峰高     | 面积百分比   | 峰宽    | 峰类型 |
|----|-------|-----------|--------|---------|-------|-----|
| 1  | 3.46  | 310535    | 13411  | 14.79%  | 1.133 | BB  |
| 2  | 6.88  | 316462    | 25068  | 15.07%  | 0.859 | BB  |
| 3  | 13.60 | 732353    | 19445  | 34.87%  | 2.5   | BB  |
| 4  | 28.98 | 740794    | 14555  | 35.27%  | 1.875 | BB  |
| 总计 |       | 2,100,144 | 72,479 | 100.00% |       |     |

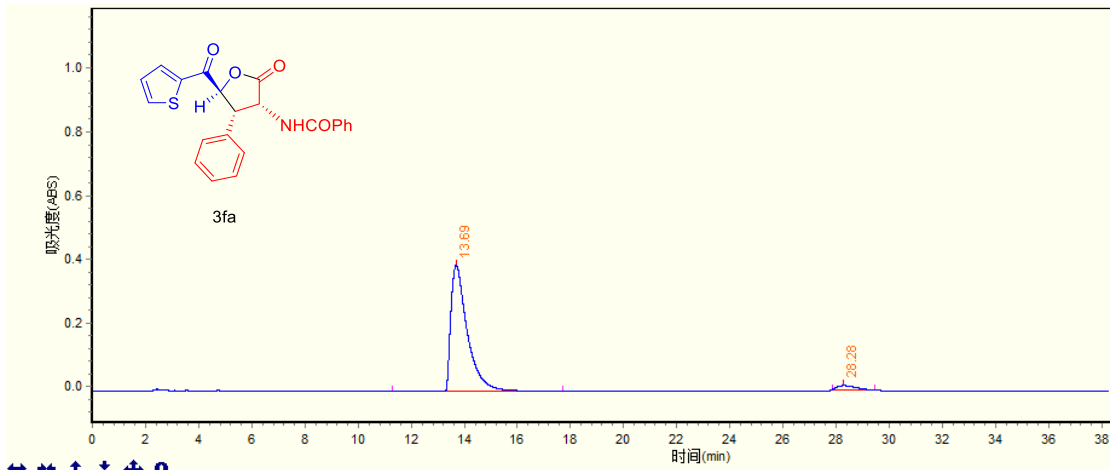

| 序号 | 保留时间  | 峰面积       | 峰高      | 面积百分比   | 峰宽    | 峰类型 |
|----|-------|-----------|---------|---------|-------|-----|
| 1  | 13.69 | 8481874   | 197464  | 96.49%  | 6.419 | BB  |
| 2  | 28.28 | 308528    | 6261    | 3.51%   | 1.593 | BB  |
| 总计 |       | 8,790,402 | 203,725 | 100.00% |       |     |

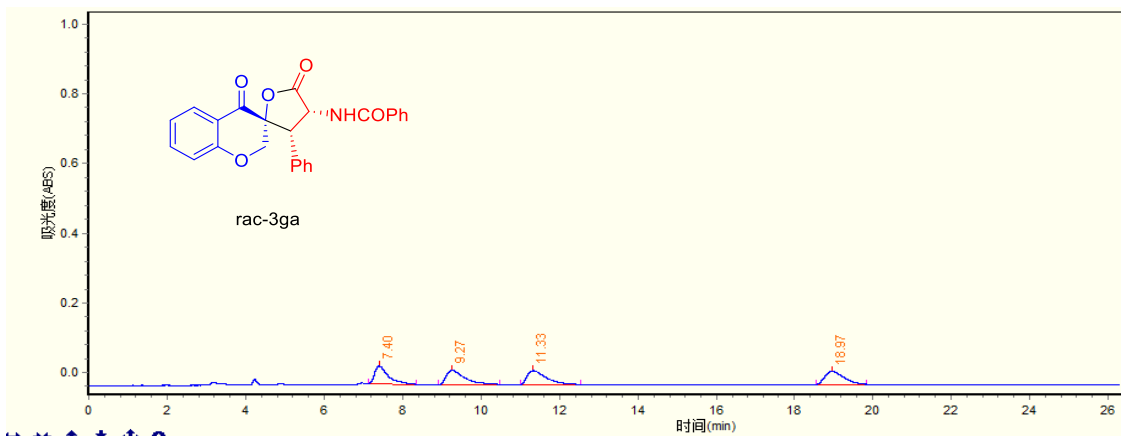

| 序号 | 保留时间  | 峰面积       | 峰高     | 面积百分比   | 峰宽    | 峰类型 |
|----|-------|-----------|--------|---------|-------|-----|
| 1  | 7.40  | 626896    | 25783  | 24.38%  | 1.22  | BB  |
| 2  | 9.27  | 650179    | 20442  | 25.29%  | 1.563 | BB  |
| 3  | 11.33 | 666977    | 19840  | 25.94%  | 1.533 | BB  |
| 4  | 18.97 | 626947    | 18524  | 24.39%  | 1.282 | BB  |
| 总计 |       | 2,570,999 | 84,589 | 100.00% |       |     |

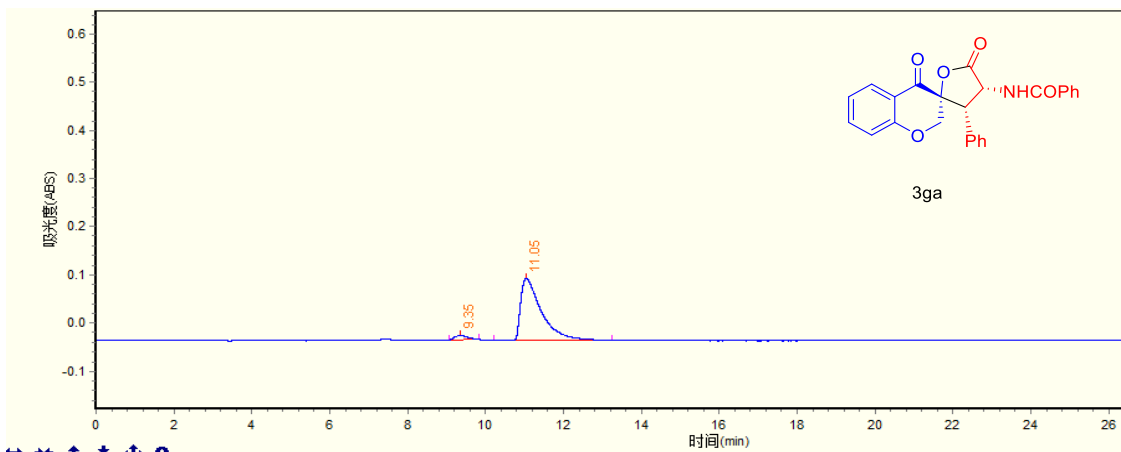

| 序号 | 保留时间  | 峰面积       | 峰高     | 面积百分比   | 峰宽    | 峰类型 |
|----|-------|-----------|--------|---------|-------|-----|
| 1  | 9.35  | 103722    | 4275   | 4.20%   | 0.766 | BB  |
| 2  | 11.05 | 2367492   | 64308  | 95.80%  | 3.032 | BB  |
| 总计 |       | 2,471,214 | 68,583 | 100.00% |       |     |

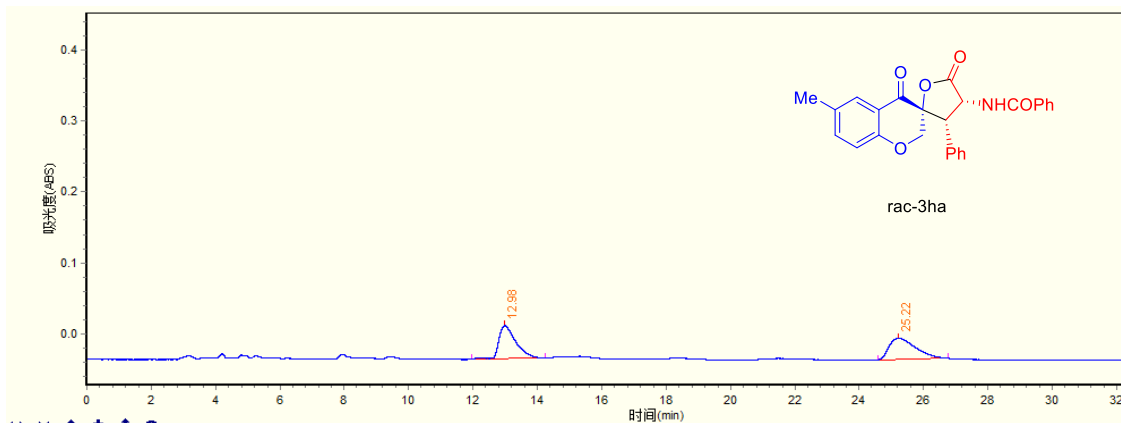

| 序号 | 保留时间  | 峰面积       | 峰高     | 面积百分比   | 峰宽    | 峰类型 |
|----|-------|-----------|--------|---------|-------|-----|
| 1  | 12.98 | 859244    | 23231  | 50.34%  | 2.271 | BB  |
| 2  | 25.22 | 847690    | 14901  | 49.66%  | 2.18  | BB  |
| 总计 |       | 1,706,934 | 38,132 | 100.00% |       |     |

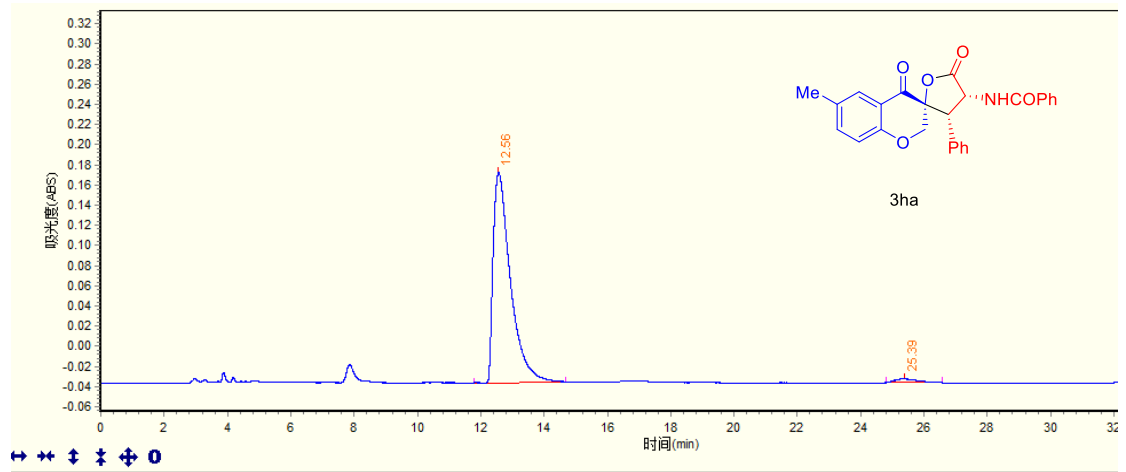

| 序号 | 保留时间  | 峰面积       | 峰高      | 面积百分比   | 峰宽    | 峰类型 |
|----|-------|-----------|---------|---------|-------|-----|
| 1  | 12.56 | 3937640   | 104054  | 97.76%  | 2.9   | BB  |
| 2  | 25.39 | 90190     | 1828    | 2.24%   | 1.772 | BB  |
| 总计 |       | 4,027,830 | 105,882 | 100.00% |       |     |

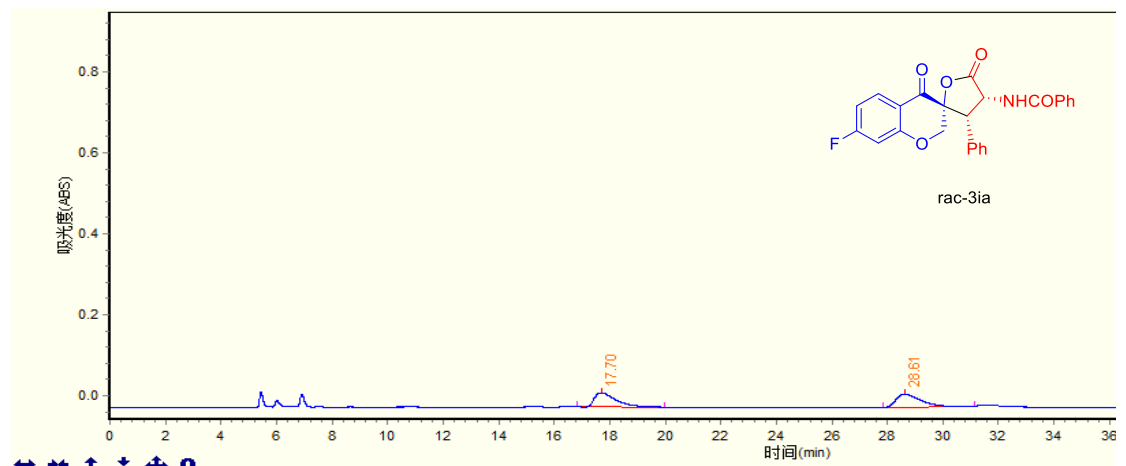

| 序号 | 保留时间  | 峰面积       | 峰高     | 面积百分比   | 峰宽    | 峰类型 |
|----|-------|-----------|--------|---------|-------|-----|
| 1  | 17.70 | 939142    | 17448  | 50.31%  | 3.148 | BB  |
| 2  | 28.61 | 927395    | 15762  | 49.69%  | 3.296 | BB  |
| 总计 |       | 1,866,537 | 33,210 | 100.00% |       |     |

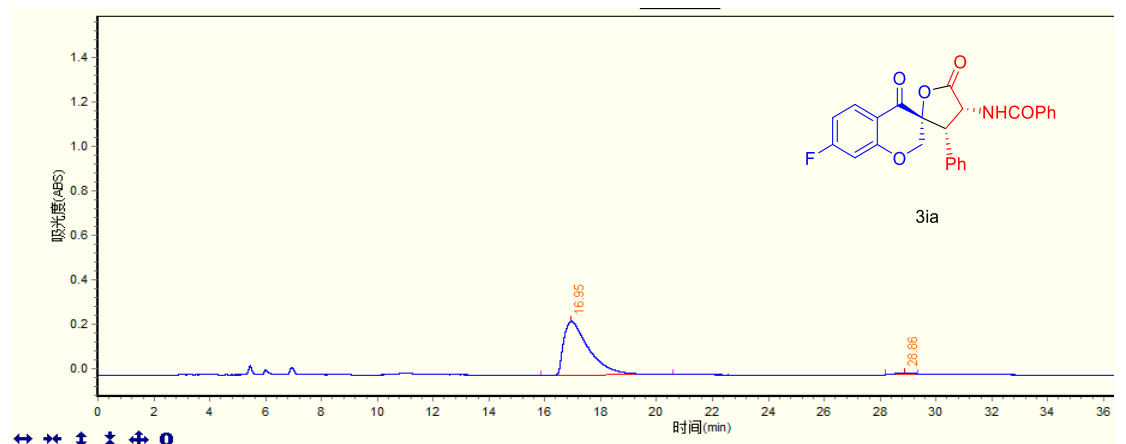

| 序号 | 保留时间  | 峰面积       | 峰高      | 面积百分比   | 峰宽    | 峰类型 |
|----|-------|-----------|---------|---------|-------|-----|
| 1  | 16.95 | 7537332   | 120307  | 98.54%  | 4.727 | BB  |
| 2  | 28.86 | 111784    | 2863    | 1.46%   | 1.16  | BB  |
| 总计 |       | 7,649,116 | 123,170 | 100.00% |       |     |



## Single-crystal X-ray diffraction of 3a (CCDC 2074877)

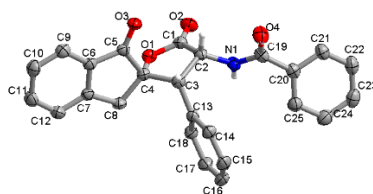

### Datablock: 202011247

---

|                        |                |                    |                |
|------------------------|----------------|--------------------|----------------|
| Bond precision:        | C-C = 0.0067 Å | Wavelength=1.54184 |                |
| Cell:                  | a=9.3096 (18)  | b=10.340 (3)       | c=10.3533 (17) |
|                        | alpha=90       | beta=91.294 (17)   | gamma=90       |
| Temperature:           | 293 K          |                    |                |
|                        | Calculated     | Reported           |                |
| Volume                 | 996.4 (4)      | 996.4 (4)          |                |
| Space group            | P 21           | P 1 21 1           |                |
| Hall group             | P 2yb          | P 2yb              |                |
| Moiety formula         | C25 H19 N O4   | C25 H19 N O4       |                |
| Sum formula            | C25 H19 N O4   | C25 H19 N O4       |                |
| Mr                     | 397.41         | 397.41             |                |
| Dx, g cm <sup>-3</sup> | 1.325          | 1.325              |                |
| Z                      | 2              | 2                  |                |
| Mu (mm <sup>-1</sup> ) | 0.732          | 0.732              |                |
| F000                   | 416.0          | 416.0              |                |
| F000'                  | 417.30         |                    |                |
| h,k,lmax               | 11,12,12       | 11,12,12           |                |
| Nref                   | 3559 [ 1888]   | 3218               |                |
| Tmin,Tmax              | 0.896,0.929    | 0.767,1.000        |                |
| Tmin'                  | 0.896          |                    |                |

Correction method= # Reported T Limits: Tmin=0.767 Tmax=1.000  
AbsCorr = MULTI-SCAN

Data completeness= 1.70/0.90      Theta(max)= 67.074

R(reflections)= 0.0453 ( 2641)      wR2(reflections)= 0.1220 ( 3218)

S = 1.110      Npar= 275

---

The following ALERTS were generated. Each ALERT has the format  
**test-name ALERT alert-type alert-level.**  
Click on the hyperlinks for more details of the test.

---

**Alert level C**

|                   |                                                  |         |      |
|-------------------|--------------------------------------------------|---------|------|
| PLAT089_ALERT_3_C | Poor Data / Parameter Ratio (Zmax < 18) .....    | 6.87    | Note |
| PLAT340_ALERT_3_C | Low Bond Precision on C-C Bonds .....            | 0.00667 | Ang. |
| PLAT915_ALERT_3_C | No Flack x Check Done: Low Friedel Pair Coverage | 80      | %    |

---

**Alert level G**

|                   |                                                         |        |        |
|-------------------|---------------------------------------------------------|--------|--------|
| PLAT012_ALERT_1_G | No _shelx_res_checksum Found in CIF .....               | Please | Check  |
| PLAT199_ALERT_1_G | Reported _cell_measurement_temperature .... (K)         | 293    | Check  |
| PLAT200_ALERT_1_G | Reported _diffrn_ambient_temperature .... (K)           | 293    | Check  |
| PLAT791_ALERT_4_G | Model has Chirality at C2 (Sohnke SpGr)                 | R      | Verify |
| PLAT791_ALERT_4_G | Model has Chirality at C3 (Sohnke SpGr)                 | S      | Verify |
| PLAT791_ALERT_4_G | Model has Chirality at C4 (Sohnke SpGr)                 | S      | Verify |
| PLAT909_ALERT_3_G | Percentage of I>2 $\sigma$ (I) Data at Theta(Max) Still | 54%    | Note   |
| PLAT933_ALERT_2_G | Number of OMIT Records in Embedded .res File ...        | 6      | Note   |
| PLAT941_ALERT_3_G | Average HKL Measurement Multiplicity .....              | 4.2    | Low    |
| PLAT978_ALERT_2_G | Number C-C Bonds with Positive Residual Density.        | 0      | Info   |

---

- 0 **ALERT level A** = Most likely a serious problem - resolve or explain  
0 **ALERT level B** = A potentially serious problem, consider carefully  
3 **ALERT level C** = Check. Ensure it is not caused by an omission or oversight  
10 **ALERT level G** = General information/check it is not something unexpected
- 3 **ALERT type 1** CIF construction/syntax error, inconsistent or missing data  
2 **ALERT type 2** Indicator that the structure model may be wrong or deficient  
5 **ALERT type 3** Indicator that the structure quality may be low  
3 **ALERT type 4** Improvement, methodology, query or suggestion  
0 **ALERT type 5** Informative message, check
- 

It is advisable to attempt to resolve as many as possible of the alerts in all categories. Often the minor alerts point to easily fixed oversights, errors and omissions in your CIF or refinement strategy, so attention to these fine details can be worthwhile. In order to resolve some of the more serious problems it may be necessary to carry out additional measurements or structure refinements. However, the purpose of your study may justify the reported deviations and the more serious of these should normally be commented upon in the discussion or experimental section of a paper or in the "special\_details" fields of the CIF. checkCIF was carefully designed to identify outliers and unusual parameters, but every test has its limitations and alerts that are not important in a particular case may appear. Conversely, the absence of alerts does not guarantee there are no aspects of the results needing attention. It is up to the individual to critically assess their own results and, if necessary, seek expert advice.

**Publication of your CIF in IUCr journals**

A basic structural check has been run on your CIF. These basic checks will be run on all CIFs submitted for publication in IUCr journals (*Acta Crystallographica*, *Journal of Applied Crystallography*, *Journal of Synchrotron Radiation*); however, if you intend to submit to *Acta Crystallographica Section C* or *E* or *IUCrData*, you should make sure that full publication checks are run on the final version of your CIF prior to submission.

**Publication of your CIF in other journals**

Please refer to the *Notes for Authors* of the relevant journal for any special instructions relating to CIF submission.

## Single-crystal X-ray diffraction of 3ha (CCDC 2092642)

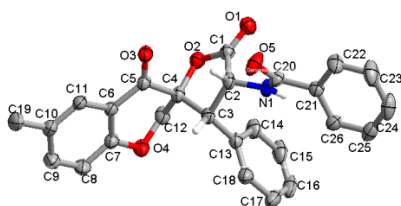

### Datablock: 202106179

---

Bond precision: C-C = 0.0050 Å      Wavelength=1.54184  
Cell:            a=10.8915(3)      b=13.7026(6)      c=14.8233(10)  
                  alpha=90            beta=90            gamma=90  
Temperature:    293 K

|                        | Calculated   | Reported     |
|------------------------|--------------|--------------|
| Volume                 | 2212.26(19)  | 2212.25(19)  |
| Space group            | P 21 21 21   | P 21 21 21   |
| Hall group             | P 2ac 2ab    | P 2ac 2ab    |
| Moiety formula         | C26 H21 N O5 | C26 H21 N O5 |
| Sum formula            | C26 H21 N O5 | C26 H21 N O5 |
| Mr                     | 427.44       | 427.44       |
| Dx, g cm <sup>-3</sup> | 1.283        | 1.283        |
| Z                      | 4            | 4            |
| Mu (mm <sup>-1</sup> ) | 0.731        | 0.731        |
| F000                   | 896.0        | 896.0        |
| F000'                  | 898.87       |              |
| h,k,lmax               | 13,16,18     | 13,16,17     |
| Nref                   | 4280 [ 2432] | 4175         |
| Tmin,Tmax              | 0.900,0.930  | 0.944,1.000  |
| Tmin'                  | 0.896        |              |

Correction method= # Reported T Limits: Tmin=0.944 Tmax=1.000  
AbsCorr = MULTI-SCAN

Data completeness= 1.72/0.98      Theta(max)= 70.932  
R(reflections)= 0.0437( 3651)      wR2(reflections)= 0.1149( 4175)  
S = 1.046                              Npar= 294

---

The following ALERTS were generated. Each ALERT has the format  
**test-name\_ALERT\_alert-type\_alert-level.**  
Click on the hyperlinks for more details of the test.

---

**Alert level C**

|                   |                                                  |         |       |
|-------------------|--------------------------------------------------|---------|-------|
| PLAT241_ALERT_2_C | High 'MainMol' Ueq as Compared to Neighbors of   | C23     | Check |
| PLAT340_ALERT_3_C | Low Bond Precision on C-C Bonds .....            | 0.00504 | Ang.  |
| PLAT918_ALERT_3_C | Reflection(s) with I(obs) much Smaller I(calc) . | 1       | Check |

---

**Alert level G**

|                   |                                                  |             |        |
|-------------------|--------------------------------------------------|-------------|--------|
| PLAT005_ALERT_5_G | No Embedded Refinement Details Found in the CIF  | Please Do ! |        |
| PLAT199_ALERT_1_G | Reported _cell_measurement_temperature .... (K)  | 293         | Check  |
| PLAT200_ALERT_1_G | Reported _diffn_ambient_temperature .... (K)     | 293         | Check  |
| PLAT791_ALERT_4_G | Model has Chirality at C2 (Sohnke SpGr)          | R           | Verify |
| PLAT791_ALERT_4_G | Model has Chirality at C3 (Sohnke SpGr)          | S           | Verify |
| PLAT791_ALERT_4_G | Model has Chirality at C4 (Sohnke SpGr)          | R           | Verify |
| PLAT912_ALERT_4_G | Missing # of PCF Reflections Above STh/L= 0.600  | 32          | Note   |
| PLAT978_ALERT_2_G | Number C-C Bonds with Positive Residual Density. | 0           | Info   |

---

0 **ALERT level A** = Most likely a serious problem - resolve or explain  
0 **ALERT level B** = A potentially serious problem, consider carefully  
3 **ALERT level C** = Check. Ensure it is not caused by an omission or oversight  
8 **ALERT level G** = General information/check it is not something unexpected

2 ALERT type 1 CIF construction/syntax error, inconsistent or missing data  
2 ALERT type 2 Indicator that the structure model may be wrong or deficient  
2 ALERT type 3 Indicator that the structure quality may be low  
4 ALERT type 4 Improvement, methodology, query or suggestion  
1 ALERT type 5 Informative message, check

---

It is advisable to attempt to resolve as many as possible of the alerts in all categories. Often the minor alerts point to easily fixed oversights, errors and omissions in your CIF or refinement strategy, so attention to these fine details can be worthwhile. In order to resolve some of the more serious problems it may be necessary to carry out additional measurements or structure refinements. However, the purpose of your study may justify the reported deviations and the more serious of these should normally be commented upon in the discussion or experimental section of a paper or in the "special\_details" fields of the CIF. checkCIF was carefully designed to identify outliers and unusual parameters, but every test has its limitations and alerts that are not important in a particular case may appear. Conversely, the absence of alerts does not guarantee there are no aspects of the results needing attention. It is up to the individual to critically assess their own results and, if necessary, seek expert advice.

#### Publication of your CIF in IUCr journals

A basic structural check has been run on your CIF. These basic checks will be run on all CIFs submitted for publication in IUCr journals (*Acta Crystallographica*, *Journal of Applied Crystallography*, *Journal of Synchrotron Radiation*); however, if you intend to submit to *Acta Crystallographica Section C* or *E* or *IUCrData*, you should make sure that full publication checks are run on the final version of your CIF prior to submission.

#### Publication of your CIF in other journals

Please refer to the *Notes for Authors* of the relevant journal for any special instructions relating to CIF submission.

## Single-crystal X-ray diffraction of 3ia (CCDC 2097633)

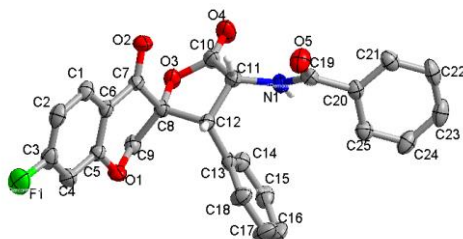

### Datablock: 202106190

---

Bond precision: C-C = 0.0054 Å                      Wavelength=1.54184

Cell:                      a=9.9904 (8)              b=9.9960 (6)              c=10.8047 (8)  
                                    alpha=90              beta=104.900 (8)              gamma=90

Temperature:              293 K

|                        | Calculated     | Reported       |
|------------------------|----------------|----------------|
| Volume                 | 1042.72 (14)   | 1042.72 (14)   |
| Space group            | P 21           | P 1 21 1       |
| Hall group             | P 2yb          | P 2yb          |
| Moiety formula         | C25 H18 F N O5 | C25 H18 F N O5 |
| Sum formula            | C25 H18 F N O5 | C25 H18 F N O5 |
| Mr                     | 431.40         | 431.40         |
| Dx, g cm <sup>-3</sup> | 1.374          | 1.374          |
| Z                      | 2              | 2              |
| Mu (mm <sup>-1</sup> ) | 0.854          | 0.854          |
| F000                   | 448.0          | 448.0          |
| F000'                  | 449.55         |                |
| h,k,lmax               | 12,12,13       | 12,12,13       |
| Nref                   | 4018 [ 2133]   | 3908           |
| Tmin,Tmax              | 0.875,0.918    | 0.923,1.000    |
| Tmin'                  | 0.872          |                |

Correction method= # Reported T Limits: Tmin=0.923 Tmax=1.000  
AbsCorr = MULTI-SCAN

Data completeness= 1.83/0.97                      Theta(max)= 70.764

R(reflections)= 0.0390 ( 3380)                      wR2(reflections)= 0.1005 ( 3908)

S = 1.057                                              Npar= 293

---



---

| ● Alert level C   |                                               |         |              |
|-------------------|-----------------------------------------------|---------|--------------|
| PLAT089_ALERT_3_C | Poor Data / Parameter Ratio (Zmax < 18) ..... | 7.20    | Note         |
| PLAT340_ALERT_3_C | Low Bond Precision on C-C Bonds .....         | 0.00538 | Ang.         |
| PLAT420_ALERT_2_C | D-H Bond Without Acceptor N1 --H1 .           |         | Please Check |

---

| ● Alert level G   |                                                  |     |              |
|-------------------|--------------------------------------------------|-----|--------------|
| PLAT012_ALERT_1_G | No _shelx_res_checksum Found in CIF .....        |     | Please Check |
| PLAT199_ALERT_1_G | Reported _cell_measurement_temperature .....     | 293 | Check        |
| PLAT200_ALERT_1_G | Reported _diffrn_ambient_temperature .....       | 293 | Check        |
| PLAT791_ALERT_4_G | Model has Chirality at C8 (Sohnke SpGr)          |     | R Verify     |
| PLAT791_ALERT_4_G | Model has Chirality at C11 (Sohnke SpGr)         |     | R Verify     |
| PLAT791_ALERT_4_G | Model has Chirality at C12 (Sohnke SpGr)         |     | S Verify     |
| PLAT912_ALERT_4_G | Missing # of PCF Reflections Above STh/L= 0.600  | 21  | Note         |
| PLAT941_ALERT_3_G | Average HKL Measurement Multiplicity .....       | 3.7 | Low          |
| PLAT978_ALERT_2_G | Number C-C Bonds with Positive Residual Density. | 2   | Info         |

---

- 0 **ALERT level A** = Most likely a serious problem - resolve or explain  
0 **ALERT level B** = A potentially serious problem, consider carefully  
3 **ALERT level C** = Check. Ensure it is not caused by an omission or oversight  
9 **ALERT level G** = General information/check it is not something unexpected
- 3 ALERT type 1 CIF construction/syntax error, inconsistent or missing data  
2 ALERT type 2 Indicator that the structure model may be wrong or deficient  
3 ALERT type 3 Indicator that the structure quality may be low  
4 ALERT type 4 Improvement, methodology, query or suggestion  
0 ALERT type 5 Informative message, check
- 

It is advisable to attempt to resolve as many as possible of the alerts in all categories. Often the minor alerts point to easily fixed oversights, errors and omissions in your CIF or refinement strategy, so attention to these fine details can be worthwhile. In order to resolve some of the more serious problems it may be necessary to carry out additional measurements or structure refinements. However, the purpose of your study may justify the reported deviations and the more serious of these should normally be commented upon in the discussion or experimental section of a paper or in the "special\_details" fields of the CIF. checkCIF was carefully designed to identify outliers and unusual parameters, but every test has its limitations and alerts that are not important in a particular case may appear. Conversely, the absence of alerts does not guarantee there are no aspects of the results needing attention. It is up to the individual to critically assess their own results and, if necessary, seek expert advice.

#### Publication of your CIF in IUCr journals

A basic structural check has been run on your CIF. These basic checks will be run on all CIFs submitted for publication in IUCr journals (*Acta Crystallographica*, *Journal of Applied Crystallography*, *Journal of Synchrotron Radiation*); however, if you intend to submit to *Acta Crystallographica Section C* or *E* or *IUCrData*, you should make sure that full publication checks are run on the final version of your CIF prior to submission.

#### Publication of your CIF in other journals

Please refer to the *Notes for Authors* of the relevant journal for any special instructions relating to CIF submission.

## Single-crystal X-ray diffraction of rac-3aa (CCDC 2097681)

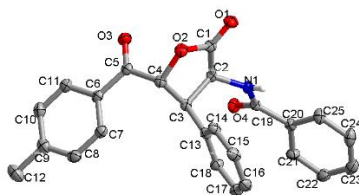

### Datablock: 20210717b4-1

---

|                        |                                            |                          |                           |
|------------------------|--------------------------------------------|--------------------------|---------------------------|
| Bond precision:        | C-C = 0.0022 Å                             | Wavelength=1.54184       |                           |
| Cell:                  | a=14.9905 (2)<br>alpha=90                  | b=10.3667 (1)<br>beta=90 | c=25.5652 (3)<br>gamma=90 |
| Temperature:           | 200 K                                      |                          |                           |
|                        | Calculated                                 | Reported                 |                           |
| Volume                 | 3972.88 (8)                                | 3972.88 (8)              |                           |
| Space group            | P b c a                                    | P b c a                  |                           |
| Hall group             | -P 2ac 2ab                                 | -P 2ac 2ab               |                           |
| Moiety formula         | C25 H21 N O4                               | C25 H21 N O4             |                           |
| Sum formula            | C25 H21 N O4                               | C25 H21 N O4             |                           |
| Mr                     | 399.43                                     | 399.43                   |                           |
| Dx, g cm <sup>-3</sup> | 1.336                                      | 1.336                    |                           |
| Z                      | 8                                          | 8                        |                           |
| Mu (mm <sup>-1</sup> ) | 0.735                                      | 0.735                    |                           |
| F000                   | 1680.0                                     | 1680.0                   |                           |
| F000'                  | 1685.22                                    |                          |                           |
| h,k,lmax               | 18,12,31                                   | 18,12,31                 |                           |
| Nref                   | 3776                                       | 3765                     |                           |
| Tmin,Tmax              | 0.969,0.978                                | 0.849,1.000              |                           |
| Tmin'                  | 0.960                                      |                          |                           |
| Correction method=     | # Reported T Limits: Tmin=0.849 Tmax=1.000 |                          |                           |
| AbsCorr =              | MULTI-SCAN                                 |                          |                           |
| Data completeness=     | 0.997                                      | Theta(max)=              | 70.066                    |
| R(reflections)=        | 0.0385 ( 3052)                             | wR2(reflections)=        | 0.1053 ( 3765)            |
| S =                    | 1.035                                      | Npar=                    | 272                       |

---

The following ALERTS were generated. Each ALERT has the format  
**test-name\_ALERT\_alert-type\_alert-level**.  
Click on the hyperlinks for more details of the test.

---

**Alert level G**

|                   |                                             |         |          |
|-------------------|---------------------------------------------|---------|----------|
| PLAT007_ALERT_5_G | Number of Unrefined Donor-H Atoms .....     | 1       | Report   |
| PLAT142_ALERT_4_G | s.u. on b - Axis Small or Missing .....     | 0.00010 | Ang.     |
| PLAT720_ALERT_4_G | Number of Unusual/Non-Standard Labels ..... | 51      | Note     |
| PLAT793_ALERT_4_G | Model has Chirality at C007 (Centro SPGR)   |         | S Verify |
| PLAT793_ALERT_4_G | Model has Chirality at C008 (Centro SPGR)   |         | R Verify |
| PLAT793_ALERT_4_G | Model has Chirality at C00B (Centro SPGR)   |         | R Verify |
| PLAT941_ALERT_3_G | Average HKL Measurement Multiplicity .....  | 3.2     | Low      |

---

0 **ALERT level A** = Most likely a serious problem - resolve or explain  
0 **ALERT level B** = A potentially serious problem, consider carefully  
0 **ALERT level C** = Check. Ensure it is not caused by an omission or oversight  
7 **ALERT level G** = General information/check it is not something unexpected

0 ALERT type 1 CIF construction/syntax error, inconsistent or missing data  
0 ALERT type 2 Indicator that the structure model may be wrong or deficient  
1 ALERT type 3 Indicator that the structure quality may be low  
5 ALERT type 4 Improvement, methodology, query or suggestion  
1 ALERT type 5 Informative message, check

---

It is advisable to attempt to resolve as many as possible of the alerts in all categories. Often the minor alerts point to easily fixed oversights, errors and omissions in your CIF or refinement strategy, so attention to these fine details can be worthwhile. In order to resolve some of the more serious problems it may be necessary to carry out additional measurements or structure refinements. However, the purpose of your study may justify the reported deviations and the more serious of these should normally be commented upon in the discussion or experimental section of a paper or in the "special\_details" fields of the CIF. checkCIF was carefully designed to identify outliers and unusual parameters, but every test has its limitations and alerts that are not important in a particular case may appear. Conversely, the absence of alerts does not guarantee there are no aspects of the results needing attention. It is up to the individual to critically assess their own results and, if necessary, seek expert advice.

**Publication of your CIF in IUCr journals**

A basic structural check has been run on your CIF. These basic checks will be run on all CIFs submitted for publication in IUCr journals (*Acta Crystallographica*, *Journal of Applied Crystallography*, *Journal of Synchrotron Radiation*); however, if you intend to submit to *Acta Crystallographica Section C* or *E* or *IUCrData*, you should make sure that full publication checks are run on the final version of your CIF prior to submission.

**Publication of your CIF in other journals**

Please refer to the *Notes for Authors* of the relevant journal for any special instructions relating to CIF submission.
